# Supplementary material
Source: HighWire-hosted journal article supplement (https://www.cmaj.ca/highwire/filestream/148944/field_highwire_adjunct_files/0/220960-res-1-at.pdf)
Supplement: 220960-res-1-at.pdf [file 220960-res-1-at.pdf]

# Supplements

18/4/2023

**Efficacy and Safety of Therapeutic  
Interventions in acute pulmonary embolism:  
Systematic review and network meta-analysis**

|                                                                                                                                       |    |
|---------------------------------------------------------------------------------------------------------------------------------------|----|
| Syntaxes Used in Database Searches: EMBASE .....                                                                                      | 2  |
| Syntaxes Used in Database Searches: PUBMED .....                                                                                      | 8  |
| Syntaxes Used in Database Searches: Cochrane .....                                                                                    | 19 |
| Syntaxes Used in Database Searches: Clinical trials .....                                                                             | 20 |
| Figure S1: In hospital mortality main graph .....                                                                                     | 21 |
| Figure S2: Transfusion main graph .....                                                                                               | 22 |
| Figure S3: GI main graph .....                                                                                                        | 23 |
| Table S1: results of primary and secondary outcomes: .....                                                                            | 24 |
| Figure S4: Combined network meta-analysis primary and secondary outcomes. ....                                                        | 25 |
| Figure S5: All-cause mortality vs RCT vs NON RCT sensitivity analysis presented in forest plots. ....                                 | 26 |
| Figure S6: Major bleeding vs RCT vs NON RCT sensitivity analysis presented in forest plots. ....                                      | 27 |
| Figure S7: ICH vs RCT vs NON RCT sensitivity analysis presented in forest plots.....                                                  | 28 |
| Figure S8: Minor bleeding main and sensitivity forest plots.....                                                                      | 29 |
| Figure S9: RCT and NON-RCT netgraphs .....                                                                                            | 30 |
| Figure S10: Sensitivity analysis without “unclear” studies: .....                                                                     | 31 |
| Figure S11: Sensitivity analysis with excluded studies: .....                                                                         | 32 |
| Figure S12: Combined primary outcomes for “intermediate-high” subgroup analysis and p-score.....                                      | 33 |
| Figure S13: Netgraphs for “intermediate-high” subgroup.....                                                                           | 34 |
| Figure S14: Funnel plots .....                                                                                                        | 35 |
| Figure S15: Mortality node splitting - direct and indirect evidence in network meta-analysis .....                                    | 38 |
| Figure S16: Major bleeding node splitting - direct and indirect evidence in network meta-analysis.....                                | 39 |
| Figure S17: ICH node splitting - direct and indirect evidence in network meta-analysis .....                                          | 40 |
| Figure S18: Minor bleeding node splitting - direct and indirect evidence in network meta-analysis.....                                | 41 |
| Figure S19: Transfusion node splitting - direct and indirect evidence in network meta-analysis .....                                  | 42 |
| Figure S20: GI node splitting - direct and indirect evidence in network meta-analysis.....                                            | 43 |
| Figure S21: Mortality pairwise forest plot.....                                                                                       | 44 |
| Figure S22: Major bleeding pairwise forest plot.....                                                                                  | 45 |
| Figure S23: ICH pairwise forest plot.....                                                                                             | 46 |
| Figure S24: Minor bleeding pairwise forest plot .....                                                                                 | 47 |
| Figure S25: Transfusion pairwise forest plot .....                                                                                    | 48 |
| Figure S26: GI pairwise forest plot .....                                                                                             | 49 |
| Table S2: summary key characteristics of treatment comparisons .....                                                                  | 50 |
| Figure S27: P-score ranking for main and secondary outcomes. ....                                                                     | 51 |
| Figure S28: Risk of bias assessment for randomized control studies, evaluated by the Cochrane Collaboration's Risk of Bias Tool ..... | 52 |
| Table S3: Risk of bias and quality of nonrandomized studies, evaluated by the Newcastle-Ottawa Scale (NOS) ..                         | 54 |
| Figure S28: GRADE assessment: .....                                                                                                   | 56 |
| Table S4: Reasons for studies exclusion .....                                                                                         | 58 |
| Table S5: Bleeding definitions.....                                                                                                   | 60 |
| Table S6: Mortality Outcomes in each study .....                                                                                      | 62 |
| Reference:.....                                                                                                                       | 64 |

## Syntaxes Used in Database Searches: EMBASE

| No. | Query                                                                                                                                                                                                                                                                                                                                                                                                                                                                                                                                                                                                                                                                                                                                                                                                                                                                                                                                                                                                                                                                                                                                                                                                                                                                                                                                                                                                                                                                                                                                                                                                                                                                                                                                                                                                                                                                                                                                                                                                                                                                                                                                                                                                                                                                                                                                                                                                                                                                                                                                                                                                                                                                                                                                                                                                                                                                                                         | Results |
|-----|---------------------------------------------------------------------------------------------------------------------------------------------------------------------------------------------------------------------------------------------------------------------------------------------------------------------------------------------------------------------------------------------------------------------------------------------------------------------------------------------------------------------------------------------------------------------------------------------------------------------------------------------------------------------------------------------------------------------------------------------------------------------------------------------------------------------------------------------------------------------------------------------------------------------------------------------------------------------------------------------------------------------------------------------------------------------------------------------------------------------------------------------------------------------------------------------------------------------------------------------------------------------------------------------------------------------------------------------------------------------------------------------------------------------------------------------------------------------------------------------------------------------------------------------------------------------------------------------------------------------------------------------------------------------------------------------------------------------------------------------------------------------------------------------------------------------------------------------------------------------------------------------------------------------------------------------------------------------------------------------------------------------------------------------------------------------------------------------------------------------------------------------------------------------------------------------------------------------------------------------------------------------------------------------------------------------------------------------------------------------------------------------------------------------------------------------------------------------------------------------------------------------------------------------------------------------------------------------------------------------------------------------------------------------------------------------------------------------------------------------------------------------------------------------------------------------------------------------------------------------------------------------------------------|---------|
| #18 | <p>((('pulmonary thromboembolism':ti,ab,kw OR 'pulmonary artery thromboembolism':ti,ab,kw OR 'massive pulmonary embolism':ti,ab,kw OR 'submassive pulmonary embolism':ti,ab,kw OR 'acute pulmonary embolism':ti,ab,kw OR 'pulmonary embolism':ti,ab,kw OR 'bronchial vascular hypertrophy':ti,ab,kw OR 'intrapulmonary shunt':ti,ab,kw OR 'pulmonary artery filling defect':ti,ab,kw OR 'lung embolism':ti,ab,kw OR 'lung embolization':ti,ab,kw OR 'lung embolus':ti,ab,kw OR 'lung emboly':ti,ab,kw OR 'lung microembolism':ti,ab,kw OR 'lung microembolization':ti,ab,kw OR 'lung microembolus':ti,ab,kw OR 'lung thromboembolism':ti,ab,kw OR 'pulmonary embolization':ti,ab,kw OR 'pulmonary embolus':ti,ab,kw OR 'pulmonary microembolism':ti,ab,kw OR 'pulmonary thromboembolic disease':ti,ab,kw) OR ('lung embolism'/exp OR 'massive pulmonary embolism'/exp OR 'submassive pulmonary embolism'/exp OR 'acute pulmonary embolism'/exp OR 'pulmonary shunt'/exp)) AND (((embolectomy:ti,ab,kw OR 'percutaneous thrombectomy':ti,ab,kw OR 'percutaneous coronary intervention':ti,ab,kw OR 'catheter directed thrombolysis':ti,ab,kw OR 'catheter directed thrombolytic therapy':ti,ab,kw OR cdt:ti,ab,kw OR 'catheter based thrombectomy':ti,ab,kw OR 'catheter directed thrombectomy':ti,ab,kw OR 'endovascular embolectomy':ti,ab,kw OR 'endovascular thrombectomy':ti,ab,kw OR 'mechanical thrombolysis':ti,ab,kw OR 'mechanical clot disruption':ti,ab,kw OR 'atherectomy':ti,ab,kw OR 'atheroma resection':ti,ab,kw OR 'percutaneous transluminal angioplasty':ti,ab,kw OR 'percutaneous transluminal':ti,ab,kw OR 'transluminal artery dilatation':ti,ab,kw OR 'transluminal angioplasty':ti,ab,kw) OR ('embolectomy'/exp OR 'interventional cardiovascular procedure'/de OR 'atherectomy'/exp OR 'percutaneous coronary intervention'/exp OR 'percutaneous transluminal angioplasty'/exp OR 'catheter directed thrombolysis'/exp OR 'percutaneous thrombectomy'/exp)) OR (('antithrombogenic agent':ti,ab,kw OR 'antithrombic drug':ti,ab,kw OR 'fibrinoly*':ti,ab,kw OR 'thromboly*':ti,ab,kw) OR ('fibrinolytic therapy'/exp OR 'fibrinolytic agent'/exp)))) AND (('crossover procedure':de OR 'double-blind procedure':de OR 'randomized controlled trial':de OR 'single-blind procedure':de OR random*:de,ab,ti OR factorial*:de,ab,ti OR crossover*:de,ab,ti OR ((cross NEXT/1 over*):de,ab,ti) OR placebo*:de,ab,ti OR ((doubl* NEAR/1 blind*):de,ab,ti) OR ((singl* NEAR/1 blind*):de,ab,ti) OR assign*:de,ab,ti OR allocat*:de,ab,ti OR volunteer*:de,ab,ti) OR ('cohort analysis'/exp OR 'analysis, cohort':ti,ab OR 'cohort analysis':ti,ab OR 'cohort fertility':ti,ab OR 'cohort life cycle':ti,ab OR 'cohort studies':ti,ab OR 'cohort study':ti,ab OR 'fertility, cohort':ti,ab OR cohort:ti,ab) OR ('case control study'/exp OR 'case control study':ti,ab OR 'case-control</p> | 2005    |

|     |                                                                                                                                                                                                                                                                                                                                                                                                                                                                                                                                                                                                                                                                                                                                                                                                                                                                                                                                                                                                                                                                                                                                                                                                                                                                                                                                                                                                                                                                                                                                                                                                                                                                                                                                                                                                                                                                                                                                                                                                                                                                                                                                                                                                                                                                                                                                                                                                                                                                                                                                                                                                                                                                                                                                                                                                                                                                                                         |         |
|-----|---------------------------------------------------------------------------------------------------------------------------------------------------------------------------------------------------------------------------------------------------------------------------------------------------------------------------------------------------------------------------------------------------------------------------------------------------------------------------------------------------------------------------------------------------------------------------------------------------------------------------------------------------------------------------------------------------------------------------------------------------------------------------------------------------------------------------------------------------------------------------------------------------------------------------------------------------------------------------------------------------------------------------------------------------------------------------------------------------------------------------------------------------------------------------------------------------------------------------------------------------------------------------------------------------------------------------------------------------------------------------------------------------------------------------------------------------------------------------------------------------------------------------------------------------------------------------------------------------------------------------------------------------------------------------------------------------------------------------------------------------------------------------------------------------------------------------------------------------------------------------------------------------------------------------------------------------------------------------------------------------------------------------------------------------------------------------------------------------------------------------------------------------------------------------------------------------------------------------------------------------------------------------------------------------------------------------------------------------------------------------------------------------------------------------------------------------------------------------------------------------------------------------------------------------------------------------------------------------------------------------------------------------------------------------------------------------------------------------------------------------------------------------------------------------------------------------------------------------------------------------------------------------------|---------|
|     | studies':ti,ab OR 'case-control study':ti,ab OR 'control study, case':ti,ab OR 'matched case control':ti,ab OR 'matched case control studies':ti,ab OR 'matched case control study':ti,ab OR 'case control':ti,ab))) NOT 'review'/exp                                                                                                                                                                                                                                                                                                                                                                                                                                                                                                                                                                                                                                                                                                                                                                                                                                                                                                                                                                                                                                                                                                                                                                                                                                                                                                                                                                                                                                                                                                                                                                                                                                                                                                                                                                                                                                                                                                                                                                                                                                                                                                                                                                                                                                                                                                                                                                                                                                                                                                                                                                                                                                                                   |         |
| #17 | 'review'/exp                                                                                                                                                                                                                                                                                                                                                                                                                                                                                                                                                                                                                                                                                                                                                                                                                                                                                                                                                                                                                                                                                                                                                                                                                                                                                                                                                                                                                                                                                                                                                                                                                                                                                                                                                                                                                                                                                                                                                                                                                                                                                                                                                                                                                                                                                                                                                                                                                                                                                                                                                                                                                                                                                                                                                                                                                                                                                            | 2645279 |
| #16 | (((('pulmonary thromboembolism':ti,ab,kw OR 'pulmonary artery thromboembolism':ti,ab,kw OR 'massive pulmonary embolism':ti,ab,kw OR 'submassive pulmonary embolism':ti,ab,kw OR 'acute pulmonary embolism':ti,ab,kw OR 'pulmonary embolism':ti,ab,kw OR 'bronchial vascular hypertrophy':ti,ab,kw OR 'intrapulmonary shunt':ti,ab,kw OR 'pulmonary artery filling defect':ti,ab,kw OR 'lung embolism':ti,ab,kw OR 'lung embolization':ti,ab,kw OR 'lung embolus':ti,ab,kw OR 'lung emboly':ti,ab,kw OR 'lung microembolism':ti,ab,kw OR 'lung microembolization':ti,ab,kw OR 'lung microembolus':ti,ab,kw OR 'lung thromboembolism':ti,ab,kw OR 'pulmonary embolization':ti,ab,kw OR 'pulmonary embolus':ti,ab,kw OR 'pulmonary microembolism':ti,ab,kw OR 'pulmonary thromboembolic disease':ti,ab,kw) OR ('lung embolism'/exp OR 'massive pulmonary embolism'/exp OR 'submassive pulmonary embolism'/exp OR 'acute pulmonary embolism'/exp OR 'pulmonary shunt'/exp)) AND (((embolectomy:ti,ab,kw OR 'percutaneous thrombectomy':ti,ab,kw OR 'percutaneous coronary intervention':ti,ab,kw OR 'catheter directed thrombolysis':ti,ab,kw OR 'catheter directed thrombolytic therapy':ti,ab,kw OR cdt:ti,ab,kw OR 'catheter based thrombectomy':ti,ab,kw OR 'catheter directed thrombectomy':ti,ab,kw OR 'endovascular embolectomy':ti,ab,kw OR 'endovascular thrombectomy':ti,ab,kw OR 'mechanical thrombolysis':ti,ab,kw OR 'mechanical clot disruption':ti,ab,kw OR 'atherectomy':ti,ab,kw OR 'atheroma resection':ti,ab,kw OR 'percutaneous transluminal angioplasty':ti,ab,kw OR 'percutaneous transluminal':ti,ab,kw OR 'transluminal artery dilatation':ti,ab,kw OR 'transluminal angioplasty':ti,ab,kw) OR ('embolectomy'/exp OR 'interventional cardiovascular procedure'/de OR 'atherectomy'/exp OR 'percutaneous coronary intervention'/exp OR 'percutaneous transluminal angioplasty'/exp OR 'catheter directed thrombolysis'/exp OR 'percutaneous thrombectomy'/exp)) OR (('antithrombogenic agent':ti,ab,kw OR 'antithrombic drug':ti,ab,kw OR 'fibrinoly*':ti,ab,kw OR 'thromboly*':ti,ab,kw) OR ('fibrinolytic therapy'/exp OR 'fibrinolytic agent'/exp)))) AND (('crossover procedure':de OR 'double-blind procedure':de OR 'randomized controlled trial':de OR 'single-blind procedure':de OR random*:de,ab,ti OR factorial*:de,ab,ti OR crossover*:de,ab,ti OR ((cross NEXT/1 over*):de,ab,ti) OR placebo*:de,ab,ti OR ((doubl* NEAR/1 blind*):de,ab,ti) OR ((singl* NEAR/1 blind*):de,ab,ti) OR assign*:de,ab,ti OR allocat*:de,ab,ti OR volunteer*:de,ab,ti) OR ('cohort analysis'/exp OR 'analysis, cohort':ti,ab OR 'cohort analysis':ti,ab OR 'cohort fertility':ti,ab OR 'cohort life cycle':ti,ab OR 'cohort studies':ti,ab OR 'cohort study':ti,ab OR 'fertility, cohort':ti,ab OR cohort:ti,ab) OR ('case control study'/exp OR 'case control study':ti,ab OR 'case-control | 2641    |

|     |                                                                                                                                                                                                                                                                                                                                                                                                                                                                                                                                                                                                                                                                                                                                                                                                                                                                                                                                                                                                       |         |
|-----|-------------------------------------------------------------------------------------------------------------------------------------------------------------------------------------------------------------------------------------------------------------------------------------------------------------------------------------------------------------------------------------------------------------------------------------------------------------------------------------------------------------------------------------------------------------------------------------------------------------------------------------------------------------------------------------------------------------------------------------------------------------------------------------------------------------------------------------------------------------------------------------------------------------------------------------------------------------------------------------------------------|---------|
|     | studies':ti,ab OR 'case-control study':ti,ab OR 'control study, case':ti,ab OR 'matched case control':ti,ab OR 'matched case control studies':ti,ab OR 'matched case control study':ti,ab OR 'case control':ti,ab))                                                                                                                                                                                                                                                                                                                                                                                                                                                                                                                                                                                                                                                                                                                                                                                   |         |
| #15 | ('crossover procedure':de OR 'double-blind procedure':de OR 'randomized controlled trial':de OR 'single-blind procedure':de OR random*:de,ab,ti OR factorial*:de,ab,ti OR crossover*:de,ab,ti OR ((cross NEXT/1 over*):de,ab,ti) OR placebo*:de,ab,ti OR ((doubl* NEAR/1 blind*):de,ab,ti) OR ((singl* NEAR/1 blind*):de,ab,ti) OR assign*:de,ab,ti OR allocat*:de,ab,ti OR volunteer*:de,ab,ti) OR ('cohort analysis'/exp OR 'analysis, cohort':ti,ab OR 'cohort analysis':ti,ab OR 'cohort fertility':ti,ab OR 'cohort life cycle':ti,ab OR 'cohort studies':ti,ab OR 'cohort study':ti,ab OR 'fertility, cohort':ti,ab OR cohort:ti,ab) OR ('case control study'/exp OR 'case control study':ti,ab OR 'case-control studies':ti,ab OR 'case-control study':ti,ab OR 'control study, case':ti,ab OR 'matched case control':ti,ab OR 'matched case control studies':ti,ab OR 'matched case control study':ti,ab OR 'case control':ti,ab)                                                             | 3602004 |
| #14 | 'case control study'/exp OR 'case control study':ti,ab OR 'case-control studies':ti,ab OR 'case-control study':ti,ab OR 'control study, case':ti,ab OR 'matched case control':ti,ab OR 'matched case control studies':ti,ab OR 'matched case control study':ti,ab OR 'case control':ti,ab                                                                                                                                                                                                                                                                                                                                                                                                                                                                                                                                                                                                                                                                                                             | 225545  |
| #13 | 'cohort analysis'/exp OR 'analysis, cohort':ti,ab OR 'cohort analysis':ti,ab OR 'cohort fertility':ti,ab OR 'cohort life cycle':ti,ab OR 'cohort studies':ti,ab OR 'cohort study':ti,ab OR 'fertility, cohort':ti,ab OR cohort:ti,ab                                                                                                                                                                                                                                                                                                                                                                                                                                                                                                                                                                                                                                                                                                                                                                  | 1015303 |
| #12 | 'crossover procedure':de OR 'double-blind procedure':de OR 'randomized controlled trial':de OR 'single-blind procedure':de OR random*:de,ab,ti OR factorial*:de,ab,ti OR crossover*:de,ab,ti OR ((cross NEXT/1 over*):de,ab,ti) OR placebo*:de,ab,ti OR ((doubl* NEAR/1 blind*):de,ab,ti) OR ((singl* NEAR/1 blind*):de,ab,ti) OR assign*:de,ab,ti OR allocat*:de,ab,ti OR volunteer*:de,ab,ti                                                                                                                                                                                                                                                                                                                                                                                                                                                                                                                                                                                                        | 2543752 |
| #11 | ((('pulmonary thromboembolism':ti,ab,kw OR 'pulmonary artery thromboembolism':ti,ab,kw OR 'massive pulmonary embolism':ti,ab,kw OR 'submassive pulmonary embolism':ti,ab,kw OR 'acute pulmonary embolism':ti,ab,kw OR 'pulmonary embolism':ti,ab,kw OR 'bronchial vascular hypertrophy':ti,ab,kw OR 'intrapulmonary shunt':ti,ab,kw OR 'pulmonary artery filling defect':ti,ab,kw OR 'lung embolism':ti,ab,kw OR 'lung embolization':ti,ab,kw OR 'lung embolus':ti,ab,kw OR 'lung emboly':ti,ab,kw OR 'lung microembolism':ti,ab,kw OR 'lung microembolization':ti,ab,kw OR 'lung microembolus':ti,ab,kw OR 'lung thromboembolism':ti,ab,kw OR 'pulmonary embolization':ti,ab,kw OR 'pulmonary embolus':ti,ab,kw OR 'pulmonary microembolism':ti,ab,kw OR 'pulmonary thromboembolic disease':ti,ab,kw) OR ('lung embolism'/exp OR 'massive pulmonary embolism'/exp OR 'submassive pulmonary embolism'/exp OR 'acute pulmonary embolism'/exp OR 'pulmonary shunt'/exp)) AND (((embolectomy:ti,ab,kw OR | 17694   |

|     |                                                                                                                                                                                                                                                                                                                                                                                                                                                                                                                                                                                                                                                                                                                                                                                                                                                                                                                                                                                                                                                                                                                                                                                              |        |
|-----|----------------------------------------------------------------------------------------------------------------------------------------------------------------------------------------------------------------------------------------------------------------------------------------------------------------------------------------------------------------------------------------------------------------------------------------------------------------------------------------------------------------------------------------------------------------------------------------------------------------------------------------------------------------------------------------------------------------------------------------------------------------------------------------------------------------------------------------------------------------------------------------------------------------------------------------------------------------------------------------------------------------------------------------------------------------------------------------------------------------------------------------------------------------------------------------------|--------|
|     | 'percutaneous thrombectomy':ti,ab,kw OR 'percutaneous coronary intervention':ti,ab,kw OR 'catheter directed thrombolysis':ti,ab,kw OR 'catheter directed thrombolytic therapy':ti,ab,kw OR cdt:ti,ab,kw OR 'catheter based thrombectomy':ti,ab,kw OR 'catheter directed thrombectomy':ti,ab,kw OR 'endovascular embolectomy':ti,ab,kw OR 'endovascular thrombectomy':ti,ab,kw OR 'mechanical thrombolysis':ti,ab,kw OR 'mechanical clot disruption':ti,ab,kw OR 'atherectomy':ti,ab,kw OR 'atheroma resection':ti,ab,kw OR 'percutaneous transluminal angioplasty':ti,ab,kw OR 'percutaneous transluminal':ti,ab,kw OR 'transluminal artery dilatation':ti,ab,kw OR 'transluminal angioplasty':ti,ab,kw) OR ('embolectomy'/exp OR 'interventional cardiovascular procedure'/de OR 'atherectomy'/exp OR 'percutaneous coronary intervention'/exp OR 'percutaneous transluminal angioplasty'/exp OR 'catheter directed thrombolysis'/exp OR 'percutaneous thrombectomy'/exp)) OR (('antithrombogenic agent':ti,ab,kw OR 'antithrombic drug':ti,ab,kw OR 'fibrinoly*':ti,ab,kw OR 'thromboly*':ti,ab,kw) OR ('fibrinolytic therapy'/exp OR 'fibrinolytic agent'/exp)))                          |        |
| #10 | ((embolectomy:ti,ab,kw OR 'percutaneous thrombectomy':ti,ab,kw OR 'percutaneous coronary intervention':ti,ab,kw OR 'catheter directed thrombolysis':ti,ab,kw OR 'catheter directed thrombolytic therapy':ti,ab,kw OR cdt:ti,ab,kw OR 'catheter based thrombectomy':ti,ab,kw OR 'catheter directed thrombectomy':ti,ab,kw OR 'endovascular embolectomy':ti,ab,kw OR 'endovascular thrombectomy':ti,ab,kw OR 'mechanical thrombolysis':ti,ab,kw OR 'mechanical clot disruption':ti,ab,kw OR 'atherectomy':ti,ab,kw OR 'atheroma resection':ti,ab,kw OR 'percutaneous transluminal angioplasty':ti,ab,kw OR 'percutaneous transluminal':ti,ab,kw OR 'transluminal artery dilatation':ti,ab,kw OR 'transluminal angioplasty':ti,ab,kw) OR ('embolectomy'/exp OR 'interventional cardiovascular procedure'/de OR 'atherectomy'/exp OR 'percutaneous coronary intervention'/exp OR 'percutaneous transluminal angioplasty'/exp OR 'catheter directed thrombolysis'/exp OR 'percutaneous thrombectomy'/exp)) OR (('antithrombogenic agent':ti,ab,kw OR 'antithrombic drug':ti,ab,kw OR 'fibrinoly*':ti,ab,kw OR 'thromboly*':ti,ab,kw) OR ('fibrinolytic therapy'/exp OR 'fibrinolytic agent'/exp)) | 328959 |
| #9  | ('antithrombogenic agent':ti,ab,kw OR 'antithrombic drug':ti,ab,kw OR 'fibrinoly*':ti,ab,kw OR 'thromboly*':ti,ab,kw) OR ('fibrinolytic therapy'/exp OR 'fibrinolytic agent'/exp)                                                                                                                                                                                                                                                                                                                                                                                                                                                                                                                                                                                                                                                                                                                                                                                                                                                                                                                                                                                                            | 189777 |
| #8  | 'fibrinolytic therapy'/exp OR 'fibrinolytic agent'/exp                                                                                                                                                                                                                                                                                                                                                                                                                                                                                                                                                                                                                                                                                                                                                                                                                                                                                                                                                                                                                                                                                                                                       | 145903 |
| #7  | 'antithrombogenic agent':ti,ab,kw OR 'antithrombic drug':ti,ab,kw OR 'fibrinoly*':ti,ab,kw OR 'thromboly*':ti,ab,kw                                                                                                                                                                                                                                                                                                                                                                                                                                                                                                                                                                                                                                                                                                                                                                                                                                                                                                                                                                                                                                                                          | 99473  |
| #6  | (embolectomy:ti,ab,kw OR 'percutaneous thrombectomy':ti,ab,kw OR 'percutaneous coronary intervention':ti,ab,kw OR 'catheter directed thrombolysis':ti,ab,kw OR 'catheter directed thrombolytic                                                                                                                                                                                                                                                                                                                                                                                                                                                                                                                                                                                                                                                                                                                                                                                                                                                                                                                                                                                               | 162146 |

|    |                                                                                                                                                                                                                                                                                                                                                                                                                                                                                                                                                                                                                                                                                                                                                                                                                                                                                                                                                                     |        |
|----|---------------------------------------------------------------------------------------------------------------------------------------------------------------------------------------------------------------------------------------------------------------------------------------------------------------------------------------------------------------------------------------------------------------------------------------------------------------------------------------------------------------------------------------------------------------------------------------------------------------------------------------------------------------------------------------------------------------------------------------------------------------------------------------------------------------------------------------------------------------------------------------------------------------------------------------------------------------------|--------|
|    | therapy':ti,ab,kw OR cdt:ti,ab,kw OR 'catheter based thrombectomy':ti,ab,kw OR 'catheter directed thrombectomy':ti,ab,kw OR 'endovascular embolectomy':ti,ab,kw OR 'endovascular thrombectomy':ti,ab,kw OR 'mechanical thrombolysis':ti,ab,kw OR 'mechanical clot disruption':ti,ab,kw OR atherectomy:ti,ab,kw OR 'atheroma resection':ti,ab,kw OR 'percutaneous transluminal angioplasty':ti,ab,kw OR 'percutaneous transluminal':ti,ab,kw OR 'transluminal artery dilatation':ti,ab,kw OR 'transluminal angioplasty':ti,ab,kw) OR ('embolectomy'/exp OR 'interventional cardiovascular procedure'/de OR 'atherectomy'/exp OR 'percutaneous coronary intervention'/exp OR 'percutaneous transluminal angioplasty'/exp OR 'catheter directed thrombolysis'/exp OR 'percutaneous thrombectomy'/exp)                                                                                                                                                                  |        |
| #5 | 'embolectomy'/exp OR 'interventional cardiovascular procedure'/de OR 'atherectomy'/exp OR 'percutaneous coronary intervention'/exp OR 'percutaneous transluminal angioplasty'/exp OR 'catheter directed thrombolysis'/exp OR 'percutaneous thrombectomy'/exp                                                                                                                                                                                                                                                                                                                                                                                                                                                                                                                                                                                                                                                                                                        | 146994 |
| #4 | embolectomy:ti,ab,kw OR 'percutaneous thrombectomy':ti,ab,kw OR 'percutaneous coronary intervention':ti,ab,kw OR 'catheter directed thrombolysis':ti,ab,kw OR 'catheter directed thrombolytic therapy':ti,ab,kw OR cdt:ti,ab,kw OR 'catheter based thrombectomy':ti,ab,kw OR 'catheter directed thrombectomy':ti,ab,kw OR 'endovascular embolectomy':ti,ab,kw OR 'endovascular thrombectomy':ti,ab,kw OR 'mechanical thrombolysis':ti,ab,kw OR 'mechanical clot disruption':ti,ab,kw OR atherectomy:ti,ab,kw OR 'atheroma resection':ti,ab,kw OR 'percutaneous transluminal angioplasty':ti,ab,kw OR 'percutaneous transluminal':ti,ab,kw OR 'transluminal artery dilatation':ti,ab,kw OR 'transluminal angioplasty':ti,ab,kw                                                                                                                                                                                                                                       | 87886  |
| #3 | ('pulmonary thromboembolism':ti,ab,kw OR 'pulmonary artery thromboembolism':ti,ab,kw OR 'massive pulmonary embolism':ti,ab,kw OR 'submassive pulmonary embolism':ti,ab,kw OR 'acute pulmonary embolism':ti,ab,kw OR 'pulmonary embolism':ti,ab,kw OR 'bronchial vascular hypertrophy':ti,ab,kw OR 'intrapulmonary shunt':ti,ab,kw OR 'pulmonary artery filling defect':ti,ab,kw OR 'lung embolism':ti,ab,kw OR 'lung embolization':ti,ab,kw OR 'lung embolus':ti,ab,kw OR 'lung emboly':ti,ab,kw OR 'lung microembolism':ti,ab,kw OR 'lung microembolization':ti,ab,kw OR 'lung microembolus':ti,ab,kw OR 'lung thromboembolism':ti,ab,kw OR 'pulmonary embolization':ti,ab,kw OR 'pulmonary embolus':ti,ab,kw OR 'pulmonary microembolism':ti,ab,kw OR 'pulmonary thromboembolic disease':ti,ab,kw) OR ('lung embolism'/exp OR 'massive pulmonary embolism'/exp OR 'submassive pulmonary embolism'/exp OR 'acute pulmonary embolism'/exp OR 'pulmonary shunt'/exp) | 107805 |

|    |                                                                                                                                                                                                                                                                                                                                                                                                                                                                                                                                                                                                                                                                                                                                                                                                    |       |
|----|----------------------------------------------------------------------------------------------------------------------------------------------------------------------------------------------------------------------------------------------------------------------------------------------------------------------------------------------------------------------------------------------------------------------------------------------------------------------------------------------------------------------------------------------------------------------------------------------------------------------------------------------------------------------------------------------------------------------------------------------------------------------------------------------------|-------|
| #2 | 'lung embolism'/exp OR 'massive pulmonary embolism'/exp OR 'submassive pulmonary embolism'/exp OR 'acute pulmonary embolism'/exp OR 'pulmonary shunt'/exp                                                                                                                                                                                                                                                                                                                                                                                                                                                                                                                                                                                                                                          | 98045 |
| #1 | 'pulmonary thromboembolism':ti,ab,kw OR 'pulmonary artery thromboembolism':ti,ab,kw OR 'massive pulmonary embolism':ti,ab,kw OR 'submassive pulmonary embolism':ti,ab,kw OR 'acute pulmonary embolism':ti,ab,kw OR 'pulmonary embolism':ti,ab,kw OR 'bronchial vascular hypertrophy':ti,ab,kw OR 'intrapulmonary shunt':ti,ab,kw OR 'pulmonary artery filling defect':ti,ab,kw OR 'lung embolism':ti,ab,kw OR 'lung embolization':ti,ab,kw OR 'lung embolus':ti,ab,kw OR 'lung emboly':ti,ab,kw OR 'lung microembolism':ti,ab,kw OR 'lung microembolization':ti,ab,kw OR 'lung microembolus':ti,ab,kw OR 'lung thromboembolism':ti,ab,kw OR 'pulmonary embolization':ti,ab,kw OR 'pulmonary embolus':ti,ab,kw OR 'pulmonary microembolism':ti,ab,kw OR 'pulmonary thromboembolic disease':ti,ab,kw | 62420 |



## Syntaxes Used in Database Searches: PUBMED

| Search number | Query       | Search Details                                                                                                                                                                                                                                                                                                                                                                                                                                                                                                                                                                                                                                                                                                                                                                                                                                                                                                                                                                                                                                                                                                                                                                                                                                                                                                                                                                                                                                                                               | Results |
|---------------|-------------|----------------------------------------------------------------------------------------------------------------------------------------------------------------------------------------------------------------------------------------------------------------------------------------------------------------------------------------------------------------------------------------------------------------------------------------------------------------------------------------------------------------------------------------------------------------------------------------------------------------------------------------------------------------------------------------------------------------------------------------------------------------------------------------------------------------------------------------------------------------------------------------------------------------------------------------------------------------------------------------------------------------------------------------------------------------------------------------------------------------------------------------------------------------------------------------------------------------------------------------------------------------------------------------------------------------------------------------------------------------------------------------------------------------------------------------------------------------------------------------------|---------|
| 20            | #18 NOT #19 | <p>((((((((((((((((((((("Pulmonary Thromboembolism"[Title/Abstract] OR "pulmonary artery thromboembolism"[Title/Abstract]) OR "Massive Pulmonary Embolism"[Title/Abstract]) OR "Submassive Pulmonary Embolism"[Title/Abstract]) OR "Acute pulmonary embolism"[Title/Abstract]) OR "Pulmonary Embolism"[Title/Abstract]) ) OR "intrapulmonary shunt"[Title/Abstract]) OR "pulmonary artery filling defect"[Title/Abstract]) OR "lung embolism"[Title/Abstract]) OR "lung embolization"[Title/Abstract]) OR "lung embolus"[Title/Abstract]) ) OR "lung microembolism"[Title/Abstract]) OR "lung microembolization"[Title/Abstract]) ) OR "lung thromboembolism"[Title/Abstract]) OR "pulmonary embolization"[Title/Abstract]) OR "pulmonary embolus"[Title/Abstract]) OR "pulmonary microembolism"[Title/Abstract]) OR "Pulmonary thromboembolic disease"[Title/Abstract]) AND "Pulmonary Embolism"[MeSH Terms]) AND</p> <p>((((((((((((((((((((("Embolectomy"[Title/Abstract] OR "percutaneous thrombectomy"[Title/Abstract]) OR "Percutaneous Coronary Intervention"[Title/Abstract]) OR "catheter directed thrombolysis"[Title/Abstract]) OR "catheter directed thrombolytic therapy"[Title/Abstract]) OR "CDT"[Title/Abstract]) OR "catheter based thrombectomy"[Title/Abstract]) OR "catheter directed thrombectomy"[Title/Abstract]) OR "endovascular embolectomy"[Title/Abstract]) OR "endovascular thrombectomy"[Title/Abstract]) OR "Mechanical Thrombolysis"[Title/Abstract]) OR</p> | 1,359   |

|    |                             |                                                                                                                                                                                                                                                                                                                                                                                                                                                                                                                                                                                                                                                                                                                                                                                                                                                                                                                                                                                                                                                                                                                                                                                                                                                                                                                                                                                                                                                                                                                                                                                                                                                                                                                                                                                                                                                    |           |
|----|-----------------------------|----------------------------------------------------------------------------------------------------------------------------------------------------------------------------------------------------------------------------------------------------------------------------------------------------------------------------------------------------------------------------------------------------------------------------------------------------------------------------------------------------------------------------------------------------------------------------------------------------------------------------------------------------------------------------------------------------------------------------------------------------------------------------------------------------------------------------------------------------------------------------------------------------------------------------------------------------------------------------------------------------------------------------------------------------------------------------------------------------------------------------------------------------------------------------------------------------------------------------------------------------------------------------------------------------------------------------------------------------------------------------------------------------------------------------------------------------------------------------------------------------------------------------------------------------------------------------------------------------------------------------------------------------------------------------------------------------------------------------------------------------------------------------------------------------------------------------------------------------|-----------|
|    |                             | <p>"mechanical clot disruption"[Title/Abstract]) OR<br/> "Atherectomy"[Title/Abstract]) OR<br/> ((((("plaque, atherosclerotic"[MeSH Terms] OR ("plaque"[All Fields] AND "atherosclerotic"[All Fields])) OR<br/> "atherosclerotic plaque"[All Fields]) OR<br/> "atheroma"[All Fields]) OR<br/> "atheromas"[All Fields]) AND<br/> "resection"[Title/Abstract])) OR<br/> "percutaneous transluminal angioplasty"[Title/Abstract]) OR<br/> "percutaneous transluminal"[Title/Abstract]) OR<br/> (("transluminal"[All Fields] OR "transluminally"[All Fields]) AND "artery dilatation"[Title/Abstract])) OR<br/> "transluminal angioplasty"[Title/Abstract]) OR<br/> ((((("Mechanical Thrombolysis"[MeSH Terms] OR "Endovascular Procedures"[MeSH Terms:noexp]) OR<br/> "Angioplasty"[MeSH Terms:noexp]) OR<br/> "Atherectomy"[MeSH Terms]) OR<br/> "Percutaneous Coronary Intervention"[MeSH Terms:noexp]) OR<br/> "atherectomy, coronary"[MeSH Terms])) OR<br/> ((((("antithrombogenic agent"[Title/Abstract] OR<br/> "Antithrombic Drug"[Title/Abstract]) OR<br/> "fibrinoly*"[Title/Abstract]) OR<br/> "thromboly*"[Title/Abstract]) OR<br/> ("Fibrinolytic Agents"[MeSH Terms] OR<br/> "Fibrinolytic Agents"[Pharmacological Action])))<br/> AND (((((((("randomized controlled trial"[Publication Type] OR<br/> "controlled clinical trial"[Publication Type]) OR<br/> "randomized"[Title/Abstract]) OR<br/> "placebo"[Title/Abstract]) OR<br/> "clinical trials as topic"[MeSH Terms:noexp]) OR<br/> "randomly"[Title/Abstract]) OR<br/> "trial"[Title]) NOT ("animals"[MeSH Terms] NOT ("humans"[MeSH Terms] AND "animals"[MeSH Terms])))) OR<br/> "Cohort Studies"[MeSH Terms]) OR<br/> "cohort"[Title/Abstract]) OR<br/> "case-control studies"[MeSH Terms]) OR<br/> "case control"[Title/Abstract])) NOT<br/> "Review"[Publication Type]</p> |           |
| 19 | "Review" [Publication Type] | "Review"[Publication Type]                                                                                                                                                                                                                                                                                                                                                                                                                                                                                                                                                                                                                                                                                                                                                                                                                                                                                                                                                                                                                                                                                                                                                                                                                                                                                                                                                                                                                                                                                                                                                                                                                                                                                                                                                                                                                         | 2,641,047 |

|    |             |                                                                                                                                                                                                                                                                                                                                                                                                                                                                                                                                                                                                                                                                                                                                                                                                                                                                                                                                                                                                                                                                                                                                                                                                                                                                                                                                                                                                                                                                                                                                                                                          |       |
|----|-------------|------------------------------------------------------------------------------------------------------------------------------------------------------------------------------------------------------------------------------------------------------------------------------------------------------------------------------------------------------------------------------------------------------------------------------------------------------------------------------------------------------------------------------------------------------------------------------------------------------------------------------------------------------------------------------------------------------------------------------------------------------------------------------------------------------------------------------------------------------------------------------------------------------------------------------------------------------------------------------------------------------------------------------------------------------------------------------------------------------------------------------------------------------------------------------------------------------------------------------------------------------------------------------------------------------------------------------------------------------------------------------------------------------------------------------------------------------------------------------------------------------------------------------------------------------------------------------------------|-------|
| 18 | #11 AND #17 | ((((((((((((((((("Pulmonary Thromboembolism"[Title/Abstract] OR "pulmonary artery thromboembolism"[Title/Abstract]) OR "Massive Pulmonary Embolism"[Title/Abstract]) OR "Submassive Pulmonary Embolism"[Title/Abstract]) OR "Acute pulmonary embolism"[Title/Abstract]) OR "Pulmonary Embolism"[Title/Abstract]) ) OR "intrapulmonary shunt"[Title/Abstract]) OR "pulmonary artery filling defect"[Title/Abstract]) OR "lung embolism"[Title/Abstract]) OR "lung embolization"[Title/Abstract]) OR "lung embolus"[Title/Abstract]) ) OR "lung microembolism"[Title/Abstract]) OR "lung microembolization"[Title/Abstract]) ) OR "lung thromboembolism"[Title/Abstract]) OR "pulmonary embolization"[Title/Abstract]) OR "pulmonary embolus"[Title/Abstract]) OR "pulmonary microembolism"[Title/Abstract]) OR "Pulmonary thromboembolic disease"[Title/Abstract]) AND "Pulmonary Embolism"[MeSH Terms]) AND (((((((((((((((("Embolectomy"[Title/Abstract] OR "percutaneous thrombectomy"[Title/Abstract]) OR "Percutaneous Coronary Intervention"[Title/Abstract]) OR "catheter directed thrombolysis"[Title/Abstract]) OR "catheter directed thrombolytic therapy"[Title/Abstract]) OR "CDT"[Title/Abstract]) OR "catheter based thrombectomy"[Title/Abstract]) OR "catheter directed thrombectomy"[Title/Abstract]) OR "endovascular embolectomy"[Title/Abstract]) OR "endovascular thrombectomy"[Title/Abstract]) OR "Mechanical Thrombolysis"[Title/Abstract]) OR "mechanical clot disruption"[Title/Abstract]) OR "Atherectomy"[Title/Abstract]) OR ("plaque, atherosclerotic"[MeSH | 1,545 |
|----|-------------|------------------------------------------------------------------------------------------------------------------------------------------------------------------------------------------------------------------------------------------------------------------------------------------------------------------------------------------------------------------------------------------------------------------------------------------------------------------------------------------------------------------------------------------------------------------------------------------------------------------------------------------------------------------------------------------------------------------------------------------------------------------------------------------------------------------------------------------------------------------------------------------------------------------------------------------------------------------------------------------------------------------------------------------------------------------------------------------------------------------------------------------------------------------------------------------------------------------------------------------------------------------------------------------------------------------------------------------------------------------------------------------------------------------------------------------------------------------------------------------------------------------------------------------------------------------------------------------|-------|

|    |                                 |                                                                                                                                                                                                                                                                                                                                                                                                                                                                                                                                                                                                                                                                                                                                                                                                                                                                                                                                                                                                                                                                                                                                                                                                                                                                                                                                                                                                                                                                                                                     |           |
|----|---------------------------------|---------------------------------------------------------------------------------------------------------------------------------------------------------------------------------------------------------------------------------------------------------------------------------------------------------------------------------------------------------------------------------------------------------------------------------------------------------------------------------------------------------------------------------------------------------------------------------------------------------------------------------------------------------------------------------------------------------------------------------------------------------------------------------------------------------------------------------------------------------------------------------------------------------------------------------------------------------------------------------------------------------------------------------------------------------------------------------------------------------------------------------------------------------------------------------------------------------------------------------------------------------------------------------------------------------------------------------------------------------------------------------------------------------------------------------------------------------------------------------------------------------------------|-----------|
|    |                                 | <p>Terms] OR ("plaque"[All Fields] AND "atherosclerotic"[All Fields])) OR "atherosclerotic plaque"[All Fields]) OR "atheroma"[All Fields]) OR "atheromas"[All Fields]) AND "resection"[Title/Abstract])) OR "percutaneous transluminal angioplasty"[Title/Abstract]) OR "percutaneous transluminal"[Title/Abstract]) OR (("transluminal"[All Fields] OR "transluminally"[All Fields]) AND "artery dilatation"[Title/Abstract])) OR "transluminal angioplasty"[Title/Abstract]) OR (((("Mechanical Thrombolysis"[MeSH Terms] OR "Endovascular Procedures"[MeSH Terms:noexp]) OR "Angioplasty"[MeSH Terms:noexp]) OR "Atherectomy"[MeSH Terms]) OR "Percutaneous Coronary Intervention"[MeSH Terms:noexp]) OR "atherectomy, coronary"[MeSH Terms])) OR (((("antithrombogenic agent"[Title/Abstract] OR "Antithrombic Drug"[Title/Abstract]) OR "fibrinoly*"[Title/Abstract]) OR "thromboly*"[Title/Abstract]) OR ("Fibrinolytic Agents"[MeSH Terms] OR "Fibrinolytic Agents"[Pharmacological Action]))) AND (((((((("randomized controlled trial"[Publication Type] OR "controlled clinical trial"[Publication Type]) OR "randomized"[Title/Abstract]) OR "placebo"[Title/Abstract]) OR "clinical trials as topic"[MeSH Terms:noexp]) OR "randomly"[Title/Abstract]) OR "trial"[Title]) NOT ("animals"[MeSH Terms] NOT ("humans"[MeSH Terms] AND "animals"[MeSH Terms]))) OR "Cohort Studies"[MeSH Terms]) OR "cohort"[Title/Abstract]) OR "case-control studies"[MeSH Terms]) OR "case control"[Title/Abstract])</p> |           |
| 17 | #12 OR #13 OR #14 OR #15 OR #16 | <p>((((((((("randomized controlled trial"[Publication Type] OR "controlled clinical trial"[Publication Type]) OR "randomized"[Title/Abstract]) OR "placebo"[Title/Abstract]) OR "clinical trials as topic"[MeSH Terms:noexp])</p>                                                                                                                                                                                                                                                                                                                                                                                                                                                                                                                                                                                                                                                                                                                                                                                                                                                                                                                                                                                                                                                                                                                                                                                                                                                                                   | 3,393,722 |

|    |                                                                                                                                                                                                                                     |                                                                                                                                                                                                                                                                                                                                                                                                                                                                                                                                                                                                                                                                                                                                                                  |           |
|----|-------------------------------------------------------------------------------------------------------------------------------------------------------------------------------------------------------------------------------------|------------------------------------------------------------------------------------------------------------------------------------------------------------------------------------------------------------------------------------------------------------------------------------------------------------------------------------------------------------------------------------------------------------------------------------------------------------------------------------------------------------------------------------------------------------------------------------------------------------------------------------------------------------------------------------------------------------------------------------------------------------------|-----------|
|    |                                                                                                                                                                                                                                     | OR "randomly"[Title/Abstract] OR "trial"[Title] NOT ("animals"[MeSH Terms] NOT ("humans"[MeSH Terms] AND "animals"[MeSH Terms]))) OR "Cohort Studies"[MeSH Terms] OR "cohort"[Title/Abstract] OR "case-control studies"[MeSH Terms] OR "case control"[Title/Abstract]                                                                                                                                                                                                                                                                                                                                                                                                                                                                                            |           |
| 16 | "case control"[Title/Abstract]                                                                                                                                                                                                      | "case control"[Title/Abstract]                                                                                                                                                                                                                                                                                                                                                                                                                                                                                                                                                                                                                                                                                                                                   | 124,307   |
| 15 | "Case-Control Studies"[Mesh]                                                                                                                                                                                                        | "case-control studies"[MeSH Terms]                                                                                                                                                                                                                                                                                                                                                                                                                                                                                                                                                                                                                                                                                                                               | 1,073,197 |
| 14 | cohort[Title/Abstract]                                                                                                                                                                                                              | "cohort"[Title/Abstract]                                                                                                                                                                                                                                                                                                                                                                                                                                                                                                                                                                                                                                                                                                                                         | 524,138   |
| 13 | "Cohort Studies"[Mesh]                                                                                                                                                                                                              | "Cohort Studies"[MeSH Terms]                                                                                                                                                                                                                                                                                                                                                                                                                                                                                                                                                                                                                                                                                                                                     | 1,983,481 |
| 12 | (randomized controlled trial[pt] OR controlled clinical trial[pt] OR randomized[tiab] OR placebo[tiab] OR clinical trials as topic[mesh:noexp] OR randomly[tiab] OR trial[ti] NOT (animals [mh] NOT (humans [mh] AND animals[mh]))) | (((((("randomized controlled trial"[Publication Type] OR "controlled clinical trial"[Publication Type]) OR "randomized"[Title/Abstract] OR "placebo"[Title/Abstract] OR "clinical trials as topic"[MeSH Terms:noexp]) OR "randomly"[Title/Abstract] OR "trial"[Title] NOT ("animals"[MeSH Terms] NOT ("humans"[MeSH Terms] AND "animals"[MeSH Terms]))))                                                                                                                                                                                                                                                                                                                                                                                                         | 1,188,338 |
| 11 | #3 AND #10                                                                                                                                                                                                                          | ((((((((((((((((((("Pulmonary Thromboembolism"[Title/Abstract] OR "pulmonary artery thromboembolism"[Title/Abstract] OR "Massive Pulmonary Embolism"[Title/Abstract] OR "Submassive Pulmonary Embolism"[Title/Abstract] OR "Acute pulmonary embolism"[Title/Abstract] OR "Pulmonary Embolism"[Title/Abstract]) ) OR "intrapulmonary shunt"[Title/Abstract] OR "pulmonary artery filling defect"[Title/Abstract] OR "lung embolism"[Title/Abstract] OR "lung embolization"[Title/Abstract] OR "lung embolus"[Title/Abstract]) ) OR "lung microembolism"[Title/Abstract] OR "lung microembolization"[Title/Abstract]) ) OR "lung thromboembolism"[Title/Abstract] OR "pulmonary embolization"[Title/Abstract] OR "pulmonary embolus"[Title/Abstract] OR "pulmonary | 5,386     |

|  |  |                                                                                                                                                                                                                                                                                                                                                                                                                                                                                                                                                                                                                                                                                                                                                                                                                                                                                                                                                                                                                                                                                                                                                                                                                                                                                                                                                                                                                                                                                                                                                                                                                                                                           |
|--|--|---------------------------------------------------------------------------------------------------------------------------------------------------------------------------------------------------------------------------------------------------------------------------------------------------------------------------------------------------------------------------------------------------------------------------------------------------------------------------------------------------------------------------------------------------------------------------------------------------------------------------------------------------------------------------------------------------------------------------------------------------------------------------------------------------------------------------------------------------------------------------------------------------------------------------------------------------------------------------------------------------------------------------------------------------------------------------------------------------------------------------------------------------------------------------------------------------------------------------------------------------------------------------------------------------------------------------------------------------------------------------------------------------------------------------------------------------------------------------------------------------------------------------------------------------------------------------------------------------------------------------------------------------------------------------|
|  |  | <p>microembolism"[Title/Abstract]) OR<br/> "Pulmonary thromboembolic disease"[Title/Abstract]) AND<br/> "Pulmonary Embolism"[MeSH Terms]) AND<br/> ((((((((((((("Embolectomy"[Title/Abstract] OR "percutaneous thrombectomy"[Title/Abstract]) OR "Percutaneous Coronary Intervention"[Title/Abstract]) OR "catheter directed thrombolysis"[Title/Abstract]) OR "catheter directed thrombolytic therapy"[Title/Abstract]) OR "CDT"[Title/Abstract]) OR "catheter based thrombectomy"[Title/Abstract]) OR "catheter directed thrombectomy"[Title/Abstract]) OR "endovascular embolectomy"[Title/Abstract]) OR "endovascular thrombectomy"[Title/Abstract]) OR "Mechanical Thrombolysis"[Title/Abstract]) OR "mechanical clot disruption"[Title/Abstract]) OR "Atherectomy"[Title/Abstract]) OR (((("plaque, atherosclerotic"[MeSH Terms] OR ("plaque"[All Fields] AND "atherosclerotic"[All Fields])) OR "atherosclerotic plaque"[All Fields]) OR "atheroma"[All Fields]) OR "atheromas"[All Fields]) AND "resection"[Title/Abstract])) OR "percutaneous transluminal angioplasty"[Title/Abstract]) OR "percutaneous transluminal"[Title/Abstract]) OR ("transluminal"[All Fields] OR "transluminally"[All Fields]) AND "artery dilatation"[Title/Abstract])) OR "transluminal angioplasty"[Title/Abstract]) OR (((("Mechanical Thrombolysis"[MeSH Terms] OR "Endovascular Procedures"[MeSH Terms:noexp]) OR "Angioplasty"[MeSH Terms:noexp]) OR "Atherectomy"[MeSH Terms]) OR "Percutaneous Coronary Intervention"[MeSH Terms:noexp]) OR "atherectomy, coronary"[MeSH Terms])) OR (((("antithrombogenic agent"[Title/Abstract] OR "Antithrombic Drug"[Title/Abstract])</p> |
|--|--|---------------------------------------------------------------------------------------------------------------------------------------------------------------------------------------------------------------------------------------------------------------------------------------------------------------------------------------------------------------------------------------------------------------------------------------------------------------------------------------------------------------------------------------------------------------------------------------------------------------------------------------------------------------------------------------------------------------------------------------------------------------------------------------------------------------------------------------------------------------------------------------------------------------------------------------------------------------------------------------------------------------------------------------------------------------------------------------------------------------------------------------------------------------------------------------------------------------------------------------------------------------------------------------------------------------------------------------------------------------------------------------------------------------------------------------------------------------------------------------------------------------------------------------------------------------------------------------------------------------------------------------------------------------------------|

|    |          |                                                                                                                                                                                                                                                                                                                                                                                                                                                                                                                                                                                                                                                                                                                                                                                                                                                                                                                                                                                                                                                                                                                                                                                                                                                                                                                                                                                                                                                                                                                     |         |
|----|----------|---------------------------------------------------------------------------------------------------------------------------------------------------------------------------------------------------------------------------------------------------------------------------------------------------------------------------------------------------------------------------------------------------------------------------------------------------------------------------------------------------------------------------------------------------------------------------------------------------------------------------------------------------------------------------------------------------------------------------------------------------------------------------------------------------------------------------------------------------------------------------------------------------------------------------------------------------------------------------------------------------------------------------------------------------------------------------------------------------------------------------------------------------------------------------------------------------------------------------------------------------------------------------------------------------------------------------------------------------------------------------------------------------------------------------------------------------------------------------------------------------------------------|---------|
|    |          | OR "fibrinoly*"[Title/Abstract]) OR "thromboly*"[Title/Abstract]) OR ("Fibrinolytic Agents"[MeSH Terms] OR "Fibrinolytic Agents"[Pharmacological Action]))))                                                                                                                                                                                                                                                                                                                                                                                                                                                                                                                                                                                                                                                                                                                                                                                                                                                                                                                                                                                                                                                                                                                                                                                                                                                                                                                                                        |         |
| 10 | #6 OR #9 | ((((((((((((("Embolectomy"[Title/Abstract] OR "percutaneous thrombectomy"[Title/Abstract]) OR "Percutaneous Coronary Intervention"[Title/Abstract]) OR "catheter directed thrombolysis"[Title/Abstract]) OR "catheter directed thrombolytic therapy"[Title/Abstract]) OR "CDT"[Title/Abstract]) OR "catheter based thrombectomy"[Title/Abstract]) OR "catheter directed thrombectomy"[Title/Abstract]) OR "endovascular embolectomy"[Title/Abstract]) OR "endovascular thrombectomy"[Title/Abstract]) OR "Mechanical Thrombolysis"[Title/Abstract]) OR "mechanical clot disruption"[Title/Abstract]) OR "Atherectomy"[Title/Abstract]) OR (((("plaque, atherosclerotic"[MeSH Terms] OR ("plaque"[All Fields] AND "atherosclerotic"[All Fields])) OR "atherosclerotic plaque"[All Fields]) OR "atheroma"[All Fields]) OR "atheromas"[All Fields]) AND "resection"[Title/Abstract])) OR "percutaneous transluminal angioplasty"[Title/Abstract]) OR "percutaneous transluminal"[Title/Abstract]) OR (("transluminal"[All Fields] OR "transluminally"[All Fields]) AND "artery dilatation"[Title/Abstract])) OR "transluminal angioplasty"[Title/Abstract]) OR (((("Mechanical Thrombolysis"[MeSH Terms] OR "Endovascular Procedures"[MeSH Terms:noexp]) OR "Angioplasty"[MeSH Terms:noexp]) OR "Atherectomy"[MeSH Terms]) OR "Percutaneous Coronary Intervention"[MeSH Terms:noexp]) OR "atherectomy, coronary"[MeSH Terms])) OR (((("antithrombogenic agent"[Title/Abstract] OR "Antithrombic Drug"[Title/Abstract]) | 284,213 |

|   |                                                                                                                                             |                                                                                                                                                                                                                                                                                                                                                                                                                                                                                                                                                                                                                                                                                                                                                                                                                                                                                         |         |
|---|---------------------------------------------------------------------------------------------------------------------------------------------|-----------------------------------------------------------------------------------------------------------------------------------------------------------------------------------------------------------------------------------------------------------------------------------------------------------------------------------------------------------------------------------------------------------------------------------------------------------------------------------------------------------------------------------------------------------------------------------------------------------------------------------------------------------------------------------------------------------------------------------------------------------------------------------------------------------------------------------------------------------------------------------------|---------|
|   |                                                                                                                                             | OR "fibrinoly*"[Title/Abstract]) OR "thromboly*"[Title/Abstract]) OR ("Fibrinolytic Agents"[MeSH Terms] OR "Fibrinolytic Agents"[Pharmacological Action]))                                                                                                                                                                                                                                                                                                                                                                                                                                                                                                                                                                                                                                                                                                                              |         |
| 9 | #7 OR #8                                                                                                                                    | "antithrombogenic agent"[Title/Abstract] OR "Antithrombic Drug"[Title/Abstract] OR "fibrinoly*"[Title/Abstract] OR "thromboly*"[Title/Abstract] OR "Fibrinolytic Agents"[MeSH Terms] OR "Fibrinolytic Agents"[Pharmacological Action]                                                                                                                                                                                                                                                                                                                                                                                                                                                                                                                                                                                                                                                   | 211,598 |
| 8 | ("Fibrinolytic Agents"[Mesh]) OR "Fibrinolytic Agents"[Pharmacological Action]                                                              | "Fibrinolytic Agents"[MeSH Terms] OR "Fibrinolytic Agents"[Pharmacological Action]                                                                                                                                                                                                                                                                                                                                                                                                                                                                                                                                                                                                                                                                                                                                                                                                      | 170,314 |
| 7 | "antithrombogenic agent"[Title/Abstract] OR "Antithrombic Drug"[Title/Abstract] OR fibrinoly*[Title/Abstract] OR thromboly*[Title/Abstract] | "antithrombogenic agent"[Title/Abstract] OR "Antithrombic Drug"[Title/Abstract] OR "fibrinoly*"[Title/Abstract] OR "thromboly*"[Title/Abstract]                                                                                                                                                                                                                                                                                                                                                                                                                                                                                                                                                                                                                                                                                                                                         | 68,961  |
| 6 | #4 OR #5                                                                                                                                    | ((((((((((((((("Embolectomy"[Title/Abstract] OR "percutaneous thrombectomy"[Title/Abstract]) OR "Percutaneous Coronary Intervention"[Title/Abstract]) OR "catheter directed thrombolysis"[Title/Abstract]) OR "catheter directed thrombolytic therapy"[Title/Abstract]) OR "CDT"[Title/Abstract]) OR "catheter based thrombectomy"[Title/Abstract]) OR "catheter directed thrombectomy"[Title/Abstract]) OR "endovascular embolectomy"[Title/Abstract]) OR "endovascular thrombectomy"[Title/Abstract]) OR "Mechanical Thrombolysis"[Title/Abstract]) OR "mechanical clot disruption"[Title/Abstract]) OR "Atherectomy"[Title/Abstract]) OR (((("plaque, atherosclerotic"[MeSH Terms] OR ("plaque"[All Fields] AND "atherosclerotic"[All Fields])) OR "atherosclerotic plaque"[All Fields]) OR "atheroma"[All Fields]) OR "atheromas"[All Fields]) AND "resection"[Title/Abstract])) OR | 85,716  |



|   |                                                                                                                                                                                                                                                                                                                                                                                                                                                                                                                            |                                                                                                                                                                                                                                                                                                                                                                                                                                                                                                                                                                                                                                                                                |        |
|---|----------------------------------------------------------------------------------------------------------------------------------------------------------------------------------------------------------------------------------------------------------------------------------------------------------------------------------------------------------------------------------------------------------------------------------------------------------------------------------------------------------------------------|--------------------------------------------------------------------------------------------------------------------------------------------------------------------------------------------------------------------------------------------------------------------------------------------------------------------------------------------------------------------------------------------------------------------------------------------------------------------------------------------------------------------------------------------------------------------------------------------------------------------------------------------------------------------------------|--------|
|   |                                                                                                                                                                                                                                                                                                                                                                                                                                                                                                                            | "percutaneous transluminal angioplasty"[Title/Abstract]) OR "percutaneous transluminal"[Title/Abstract]) OR (("transluminal"[All Fields] OR "transluminally"[All Fields]) AND "artery dilatation"[Title/Abstract])) OR "transluminal angioplasty"[Title/Abstract]) OR (((("Mechanical Thrombolysis"[MeSH Terms] OR "Endovascular Procedures"[MeSH Terms:noexp]) OR "Angioplasty"[MeSH Terms:noexp]) OR "Atherectomy"[MeSH Terms]) OR "Percutaneous Coronary Intervention"[MeSH Terms:noexp]) OR "atherectomy, coronary"[MeSH Terms])                                                                                                                                           |        |
| 5 | ((("Mechanical Thrombolysis"[Mesh]) OR "Endovascular Procedures"[Mesh:NoExp]) OR "Angioplasty"[Mesh:NoExp]) OR "Atherectomy"[Mesh]) OR "Percutaneous Coronary Intervention"[Mesh:NoExp]) OR "Atherectomy, Coronary"[Mesh]                                                                                                                                                                                                                                                                                                  | "Mechanical Thrombolysis"[MeSH Terms] OR "Endovascular Procedures"[MeSH Terms:noexp] OR "Angioplasty"[MeSH Terms:noexp] OR "Atherectomy"[MeSH Terms] OR "Percutaneous Coronary Intervention"[MeSH Terms:noexp] OR "atherectomy, coronary"[MeSH Terms]                                                                                                                                                                                                                                                                                                                                                                                                                          | 45,246 |
| 4 | (Embolectomy[Title/Abstract] OR percutaneous thrombectomy[Title/Abstract] OR percutaneous coronary intervention[Title/Abstract] OR catheter directed thrombolysis[Title/Abstract] OR catheter directed thrombolytic therapy[Title/Abstract] OR CDT[Title/Abstract] OR catheter based thrombectomy[Title/Abstract] OR catheter directed thrombectomy[Title/Abstract] OR endovascular embolectomy[Title/Abstract] OR endovascular thrombectomy[Title/Abstract] OR Mechanical Thrombolysis[Title/Abstract] OR Mechanical Clot | ((((((((((((((("Embolectomy"[Title/Abstract] OR "percutaneous thrombectomy"[Title/Abstract]) OR "percutaneous coronary intervention"[Title/Abstract]) OR "catheter directed thrombolysis"[Title/Abstract]) OR "catheter directed thrombolytic therapy"[Title/Abstract]) OR "CDT"[Title/Abstract]) OR "catheter based thrombectomy"[Title/Abstract]) OR "catheter directed thrombectomy"[Title/Abstract]) OR "endovascular embolectomy"[Title/Abstract]) OR "endovascular thrombectomy"[Title/Abstract]) OR "mechanical thrombolysis"[Title/Abstract]) OR "mechanical clot disruption"[Title/Abstract]) OR "atherectomy"[Title/Abstract]) OR (((("plaque, atherosclerotic"[MeSH | 54,993 |

|   |                                                                                                                                                                                                                                                                                                     |                                                                                                                                                                                                                                                                                                                                                                                                                                                                                                                                                                                                                                                                                                                                                                                                                                                                                |        |
|---|-----------------------------------------------------------------------------------------------------------------------------------------------------------------------------------------------------------------------------------------------------------------------------------------------------|--------------------------------------------------------------------------------------------------------------------------------------------------------------------------------------------------------------------------------------------------------------------------------------------------------------------------------------------------------------------------------------------------------------------------------------------------------------------------------------------------------------------------------------------------------------------------------------------------------------------------------------------------------------------------------------------------------------------------------------------------------------------------------------------------------------------------------------------------------------------------------|--------|
|   | Disruption[Title/Abstract] OR atherectomy[Title/Abstract] OR atheroma resection[Title/Abstract] OR percutaneous transluminal angioplasty[Title/Abstract] OR percutaneous transluminal[Title/Abstract] OR transluminal artery dilatation[Title/Abstract] OR transluminal angioplasty[Title/Abstract] | Terms] OR ("plaque"[All Fields] AND "atherosclerotic"[All Fields])) OR "atherosclerotic plaque"[All Fields]) OR "atheroma"[All Fields]) OR "atheromas"[All Fields]) AND "resection"[Title/Abstract])) OR "percutaneous transluminal angioplasty"[Title/Abstract] OR "percutaneous transluminal"[Title/Abstract]) OR (("transluminal"[All Fields] OR "transluminally"[All Fields]) AND "artery dilatation"[Title/Abstract])) OR "transluminal angioplasty"[Title/Abstract]                                                                                                                                                                                                                                                                                                                                                                                                      |        |
| 3 | #1 AND #2                                                                                                                                                                                                                                                                                           | (((((("Pulmonary Thromboembolism"[Title/Abstract] OR "pulmonary artery thromboembolism"[Title/Abstract] OR "Massive Pulmonary Embolism"[Title/Abstract] OR "Submassive Pulmonary Embolism"[Title/Abstract] OR "Acute pulmonary embolism"[Title/Abstract] OR "Pulmonary Embolism"[Title/Abstract] ) OR "intrapulmonary shunt"[Title/Abstract]) OR "pulmonary artery filling defect"[Title/Abstract]) OR "lung embolism"[Title/Abstract]) OR "lung embolization"[Title/Abstract] OR "lung embolus"[Title/Abstract] ) OR "lung microembolism"[Title/Abstract] OR "lung microembolization"[Title/Abstract] ) OR "lung thromboembolism"[Title/Abstract] OR "pulmonary embolization"[Title/Abstract] OR "pulmonary embolus"[Title/Abstract] OR "pulmonary microembolism"[Title/Abstract] OR "Pulmonary thromboembolic disease"[Title/Abstract]) AND "Pulmonary Embolism"[MeSH Terms] | 23,456 |
| 2 | "Pulmonary Embolism"[Mesh]                                                                                                                                                                                                                                                                          | "Pulmonary Embolism"[MeSH Terms]                                                                                                                                                                                                                                                                                                                                                                                                                                                                                                                                                                                                                                                                                                                                                                                                                                               | 38,498 |
| 1 | ("Pulmonary Thromboembolism"[Title/Abstract] OR "pulmonary artery thromboembolism"[Title/Abstract] OR "Massive                                                                                                                                                                                      | "Pulmonary Thromboembolism"[Title/Abstract] OR "pulmonary artery thromboembolism"[Title/Abstract] OR "Massive Pulmonary Embolism"[Title/Abstract] OR                                                                                                                                                                                                                                                                                                                                                                                                                                                                                                                                                                                                                                                                                                                           | 40,306 |

|  |                                                                                                                                                                                                                                                                                                                                                                                                                                                                                                                                                                                                                                                                                                                                                                                                                                                 |                                                                                                                                                                                                                                                                                                                                                                                                                                                                                                                                                                                                                                                                              |  |
|--|-------------------------------------------------------------------------------------------------------------------------------------------------------------------------------------------------------------------------------------------------------------------------------------------------------------------------------------------------------------------------------------------------------------------------------------------------------------------------------------------------------------------------------------------------------------------------------------------------------------------------------------------------------------------------------------------------------------------------------------------------------------------------------------------------------------------------------------------------|------------------------------------------------------------------------------------------------------------------------------------------------------------------------------------------------------------------------------------------------------------------------------------------------------------------------------------------------------------------------------------------------------------------------------------------------------------------------------------------------------------------------------------------------------------------------------------------------------------------------------------------------------------------------------|--|
|  | <p>Pulmonary Embolism"[Title/Abstract] OR "Submassive Pulmonary Embolism"[Title/Abstract] OR "Acute pulmonary embolism"[Title/Abstract] OR "pulmonary embolism"[Title/Abstract] OR "bronchial vascular hypertrophy"[Title/Abstract] OR "intrapulmonary shunt"[Title/Abstract] OR "pulmonary artery filling defect"[Title/Abstract] OR "lung embolism"[Title/Abstract] OR "lung embolization"[Title/Abstract] OR "lung embolus"[Title/Abstract] OR "lung emboly"[Title/Abstract] OR "lung microembolism"[Title/Abstract] OR "lung microembolization"[Title/Abstract] OR "lung microembolus"[Title/Abstract] OR "lung thromboembolism"[Title/Abstract] OR "pulmonary embolization"[Title/Abstract] OR "pulmonary embolus"[Title/Abstract] OR "pulmonary microembolism"[Title/Abstract] OR "Pulmonary thromboembolic disease"[Title/Abstract])</p> | <p>"Submassive Pulmonary Embolism"[Title/Abstract] OR "Acute pulmonary embolism"[Title/Abstract] OR "pulmonary embolism"[Title/Abstract] OR "intrapulmonary shunt"[Title/Abstract] OR "pulmonary artery filling defect"[Title/Abstract] OR "lung embolism"[Title/Abstract] OR "lung embolization"[Title/Abstract] OR "lung embolus "[Title/Abstract] OR "lung microembolism"[Title/Abstract] OR "lung microembolization"[Title/Abstract] OR "lung thromboembolism"[Title/Abstract] OR "pulmonary embolization"[Title/Abstract] OR "pulmonary embolus"[Title/Abstract] OR "pulmonary microembolism"[Title/Abstract] OR "Pulmonary thromboembolic disease"[Title/Abstract]</p> |  |
|--|-------------------------------------------------------------------------------------------------------------------------------------------------------------------------------------------------------------------------------------------------------------------------------------------------------------------------------------------------------------------------------------------------------------------------------------------------------------------------------------------------------------------------------------------------------------------------------------------------------------------------------------------------------------------------------------------------------------------------------------------------------------------------------------------------------------------------------------------------|------------------------------------------------------------------------------------------------------------------------------------------------------------------------------------------------------------------------------------------------------------------------------------------------------------------------------------------------------------------------------------------------------------------------------------------------------------------------------------------------------------------------------------------------------------------------------------------------------------------------------------------------------------------------------|--|

## Syntaxes Used in Database Searches: Cochrane

| ID  | Search                                                                                                                                                                                                                                                                                                                                                                                                                                                                                                                                                                                                      | Hits  |
|-----|-------------------------------------------------------------------------------------------------------------------------------------------------------------------------------------------------------------------------------------------------------------------------------------------------------------------------------------------------------------------------------------------------------------------------------------------------------------------------------------------------------------------------------------------------------------------------------------------------------------|-------|
| #1  | (pulmonary thromboembolism OR pulmonary artery thromboembolism OR massive pulmonary embolism OR submassive pulmonary embolism OR acute pulmonary embolism OR pulmonary embolism OR bronchial vascular hypertrophy OR intrapulmonary shunt OR pulmonary artery filling defect OR lung embolism OR lung embolization OR lung embolus OR lung emboly OR lung microembolism OR lung microembolization OR lung microembolus OR lung thromboembolism OR pulmonary embolization OR pulmonary embolus OR pulmonary microembolism OR pulmonary thromboembolic disease):ti,ab,kw (Word variations have been searched) | 5992  |
| #2  | MeSH descriptor: [Pulmonary Embolism] explode all trees                                                                                                                                                                                                                                                                                                                                                                                                                                                                                                                                                     | 1005  |
| #3  | #1 OR #2                                                                                                                                                                                                                                                                                                                                                                                                                                                                                                                                                                                                    | 5992  |
| #4  | (Embolectomy OR percutaneous thrombectomy OR percutaneous coronary intervention OR catheter directed thrombolysis OR catheter directed thrombolytic therapy OR CDT OR catheter based thrombectomy OR catheter directed thrombectomy OR endovascular embolectomy OR endovascular thrombectomy OR Mechanical Thrombolysis OR Mechanical Clot Disruption OR atherectomy OR atheroma resection OR percutaneous transluminal angioplasty OR percutaneous transluminal OR transluminal artery dilatation OR transluminal angioplasty):ti,ab,kw (Word variations have been searched)                               | 14838 |
| #5  | MeSH descriptor: [Mechanical Thrombolysis] explode all trees                                                                                                                                                                                                                                                                                                                                                                                                                                                                                                                                                | 31    |
| #6  | MeSH descriptor: [Endovascular Procedures] this term only                                                                                                                                                                                                                                                                                                                                                                                                                                                                                                                                                   | 398   |
| #7  | MeSH descriptor: [Angioplasty] this term only                                                                                                                                                                                                                                                                                                                                                                                                                                                                                                                                                               | 284   |
| #8  | MeSH descriptor: [Atherectomy] explode all trees                                                                                                                                                                                                                                                                                                                                                                                                                                                                                                                                                            | 142   |
| #9  | MeSH descriptor: [Percutaneous Coronary Intervention] this term only                                                                                                                                                                                                                                                                                                                                                                                                                                                                                                                                        | 1910  |
| #10 | MeSH descriptor: [Atherectomy, Coronary] this term only                                                                                                                                                                                                                                                                                                                                                                                                                                                                                                                                                     | 118   |
| #11 | #5 OR #6 OR #7 OR #8 OR #9 OR #10                                                                                                                                                                                                                                                                                                                                                                                                                                                                                                                                                                           | 2742  |
| #12 | #4 OR #11                                                                                                                                                                                                                                                                                                                                                                                                                                                                                                                                                                                                   | 15364 |
| #13 | (fibrinoly* OR thromboly* OR antithrombogenic agent OR Antithrombic Drug):ti,ab,kw (Word variations have been searched)                                                                                                                                                                                                                                                                                                                                                                                                                                                                                     | 11078 |
| #14 | MeSH descriptor: [Fibrinolytic Agents] explode all trees                                                                                                                                                                                                                                                                                                                                                                                                                                                                                                                                                    | 2160  |
| #15 | #13 OR #14                                                                                                                                                                                                                                                                                                                                                                                                                                                                                                                                                                                                  | 11078 |
| #16 | #12 OR #15                                                                                                                                                                                                                                                                                                                                                                                                                                                                                                                                                                                                  | 24205 |
| #17 | #3 AND #16                                                                                                                                                                                                                                                                                                                                                                                                                                                                                                                                                                                                  | 543   |

## Syntaxes Used in Database Searches: Clinical trials

| Terms                     | Search Results* | Entire Database** |
|---------------------------|-----------------|-------------------|
| Synonyms                  |                 |                   |
| Pulmonary Embolism        | 123 studies     | 520 studies       |
| Pulmonary embolus         | 7 studies       | 20 studies        |
| Blood Clots in the Lung   | 2 studies       | 3 studies         |
| lung embolism             | --              | 3 studies         |
| Pulmonary artery embolism | --              | 2 studies         |
| Embolism                  | 123 studies     | 2,124 studies     |
| Embolus                   | 7 studies       | 59 studies        |
| Pulmonary                 | 123 studies     | 23,241 studies    |
| Lungs                     | 101 studies     | 21,489 studies    |
| Pulmo                     | --              | 2 studies         |
| Fibrinolytic              | 110 studies     | 2,197 studies     |
| Thrombolytic Therapies    | 9 studies       | 54 studies        |
| thrombolytic              | 120 studies     | 2,343 studies     |
| Fibrinolytic Agents       | 107 studies     | 2,123 studies     |
| thrombolysis              | 25 studies      | 280 studies       |
| Antithrombotic Agent      | 1 studies       | 19 studies        |
| Fibrinolytic Drugs        | --              | 3 studies         |
| Fibrinolysis              | 4 studies       | 115 studies       |
| thrombolysis              | 34 studies      | 355 studies       |
| thrombolytic              | 15 studies      | 123 studies       |

Figure SI: In hospital mortality main graph

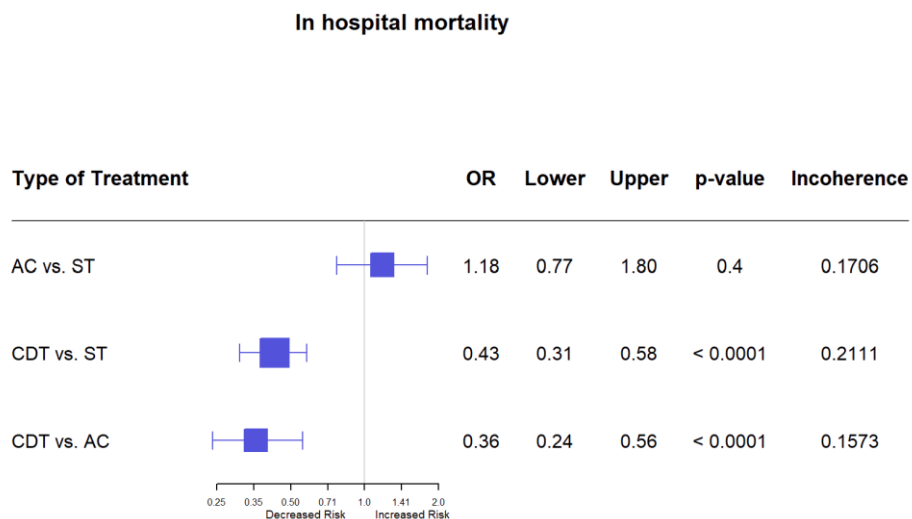

Quantifying heterogeneity / inconsistency:  
 $\tau^2 = 0.1328$ ;  $\tau = 0.3644$ ;  $I^2 = 46.1\%$  [17.8%; 64.7%]

Figure S2: Transfusion main graph

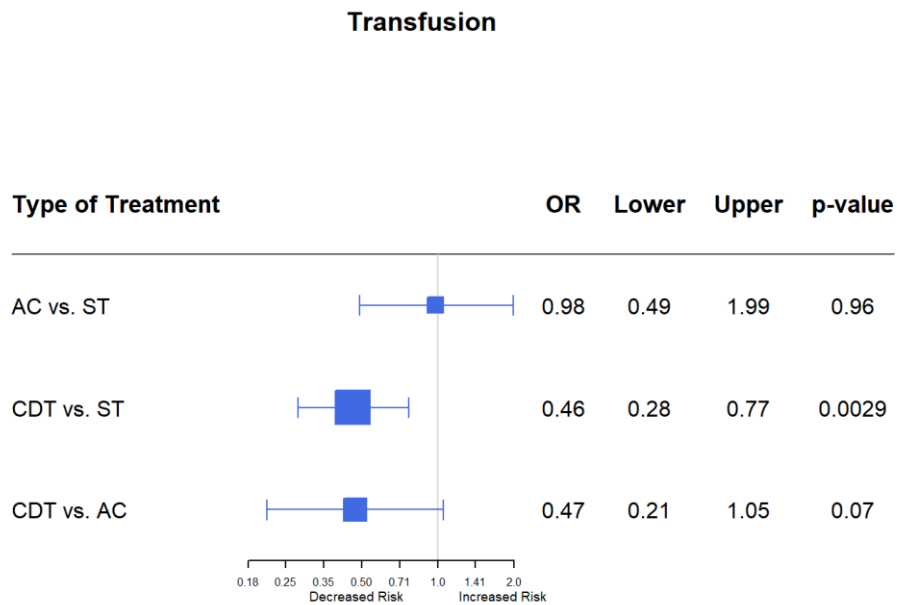

Quantifying heterogeneity / inconsistency:  
 $\tau^2 = 0.1647$ ;  $\tau = 0.4058$ ;  $I^2 = 35.1\%$  [0.0%; 65.0%]

Figure S3: GI main graph

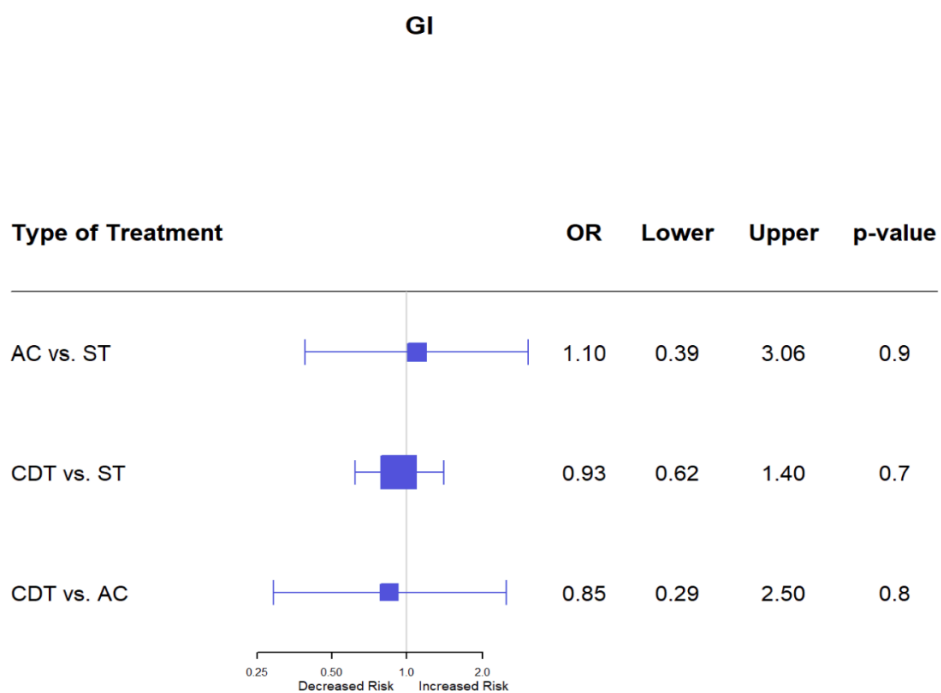

Quantifying heterogeneity / inconsistency:  
 $\tau^2 = 0.2017$ ;  $\tau = 0.4491$ ;  $I^2 = 71.7\%$  [46.2%; 85.1%]



Table S1: results of primary and secondary outcomes:

| OR (95%CI)       | Mortality                | ICH                      | Major bleeding           | Minor bleeding           | GI bleeding       | Blood transfusion        |
|------------------|--------------------------|--------------------------|--------------------------|--------------------------|-------------------|--------------------------|
| <b>AC vs ST</b>  | 1.20 [0.83; 1.73]        | <b>0.33 [0.17; 0.63]</b> | <b>0.49 [0.36; 0.67]</b> | <b>0.35 [0.24; 0.52]</b> | 1.10 [0.39; 3.06] | 0.98 [0.49; 1.99]        |
| <b>CDT vs ST</b> | <b>0.42 [0.31; 0.57]</b> | <b>0.44 [0.29; 0.64]</b> | <b>0.61 [0.53; 0.70]</b> | 1.11 [0.66; 1.86]        | 0.93 [0.62; 1.40] | <b>0.46 [0.28; 0.77]</b> |
| <b>CDT vs AC</b> | <b>0.35 [0.24; 0.51]</b> | 1.33 [0.63; 2.79]        | 1.24 [0.88; 1.75]        | 3.14 [1.73; 5.68]        | 0.85 [0.29; 2.50] | 0.47 [0.21; 1.05]        |

Figure S4: Combined network meta-analysis primary and secondary outcomes.

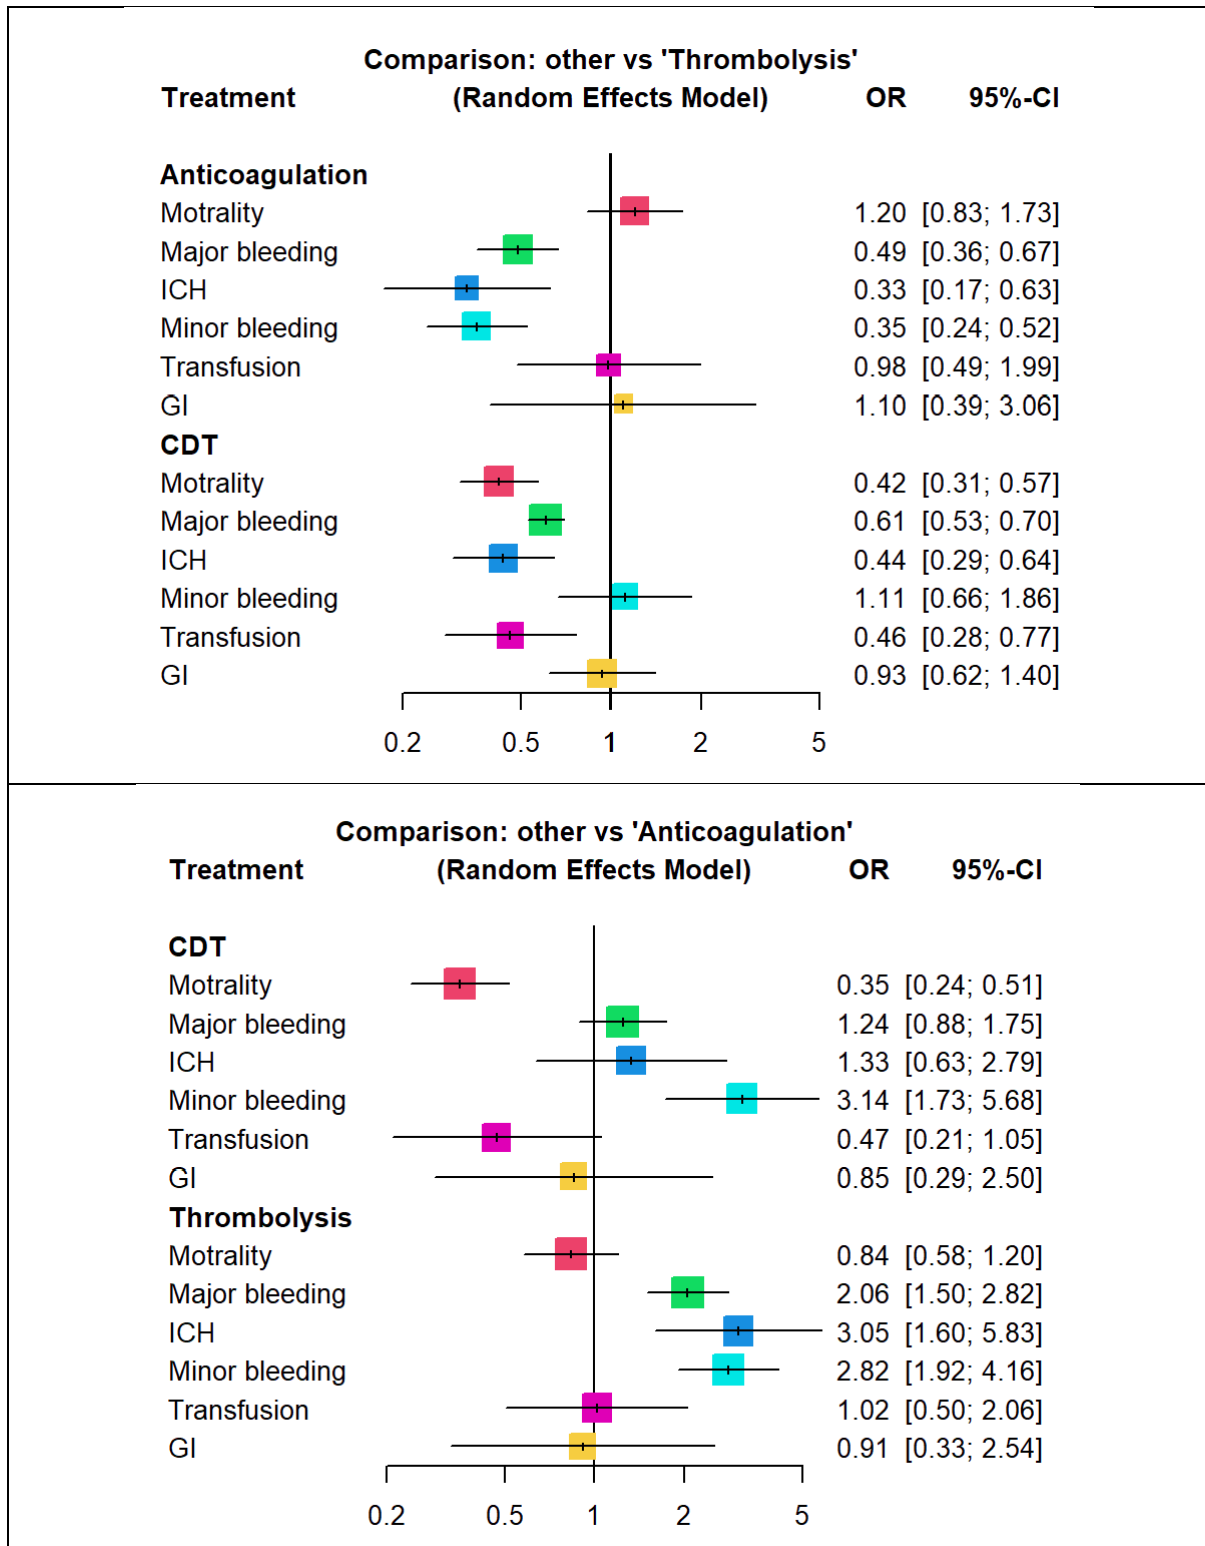

Figure S5: All-cause mortality vs RCT vs NON RCT sensitivity analysis presented in forest plots.

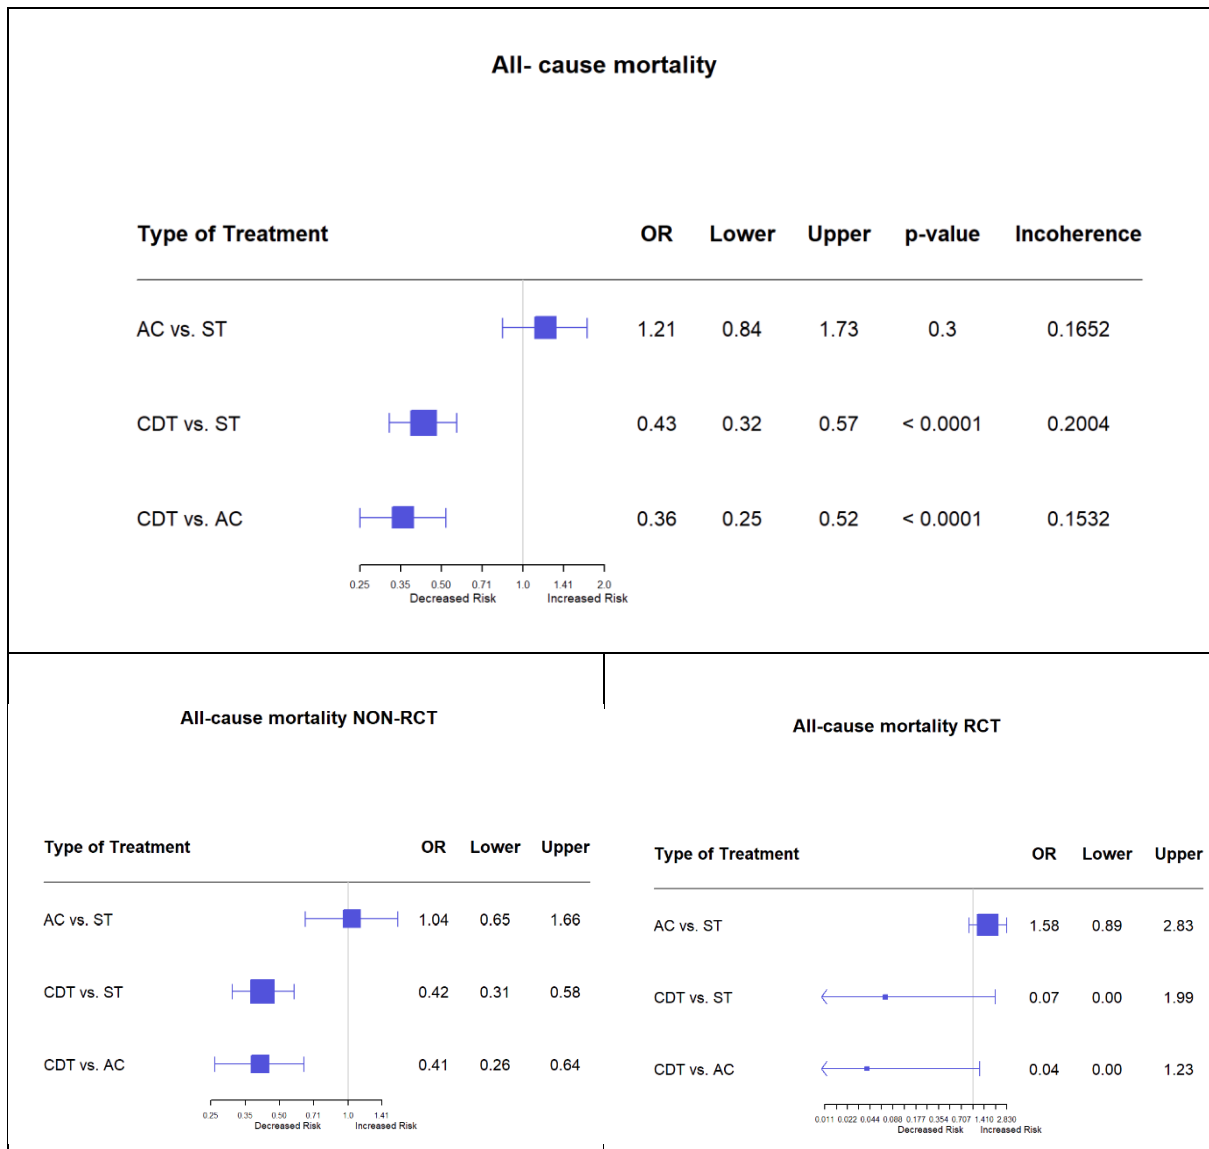

Figure S6: Major bleeding vs RCT vs NON RCT sensitivity analysis presented in forest plots.

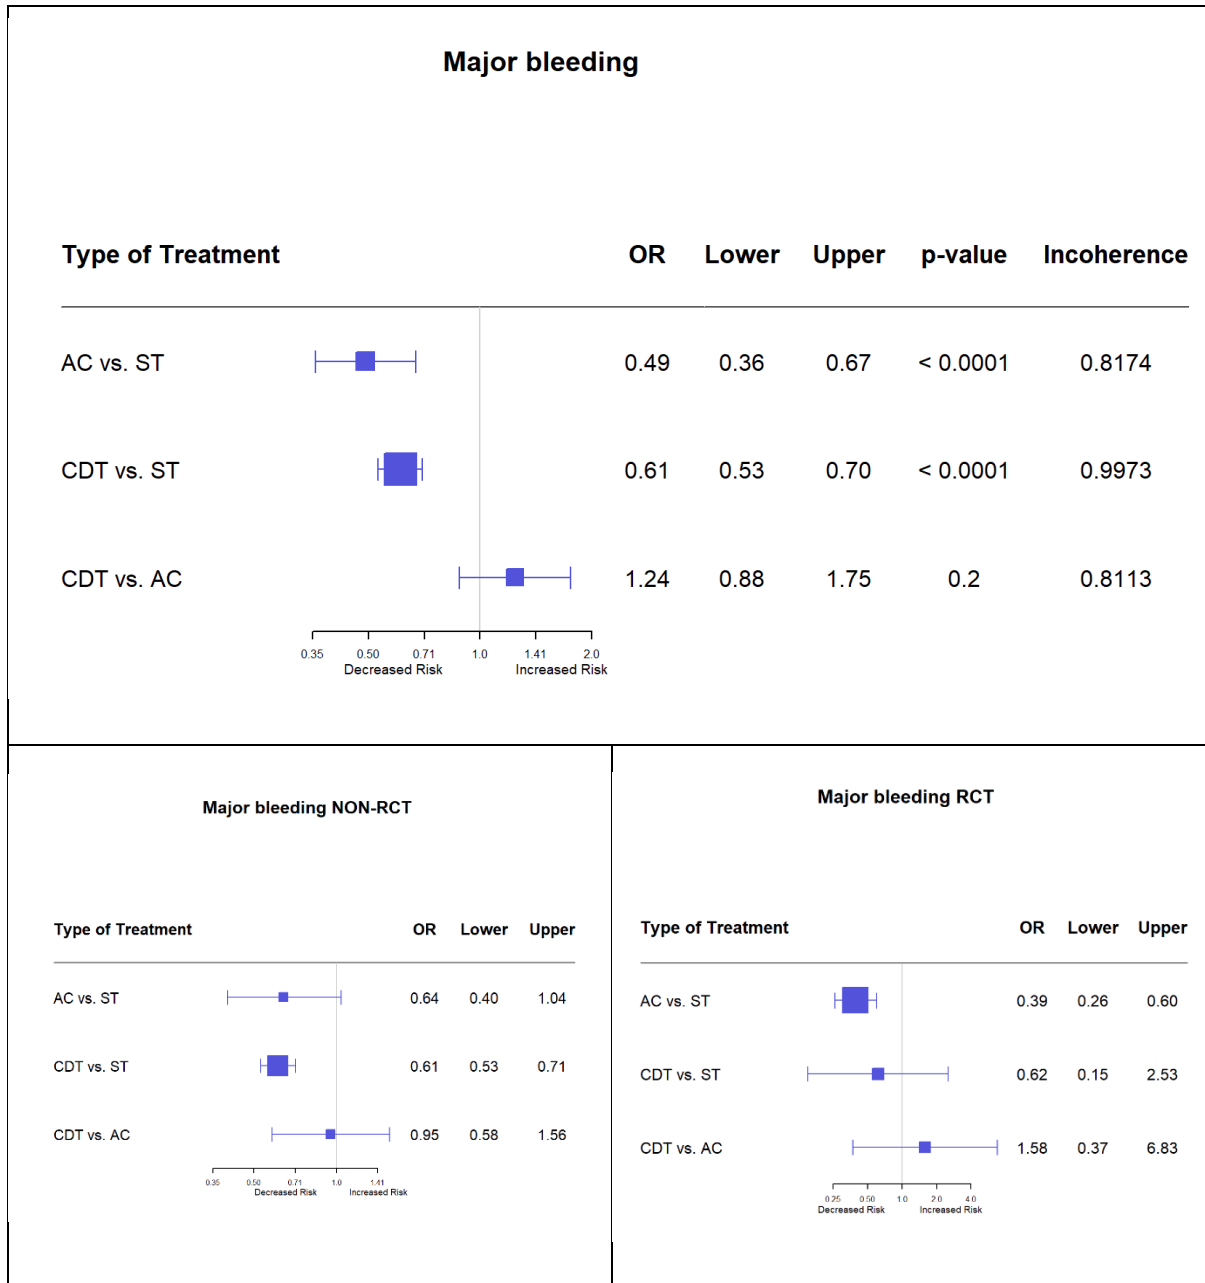

Figure S7: ICH vs RCT vs NON RCT sensitivity analysis presented in forest plots.

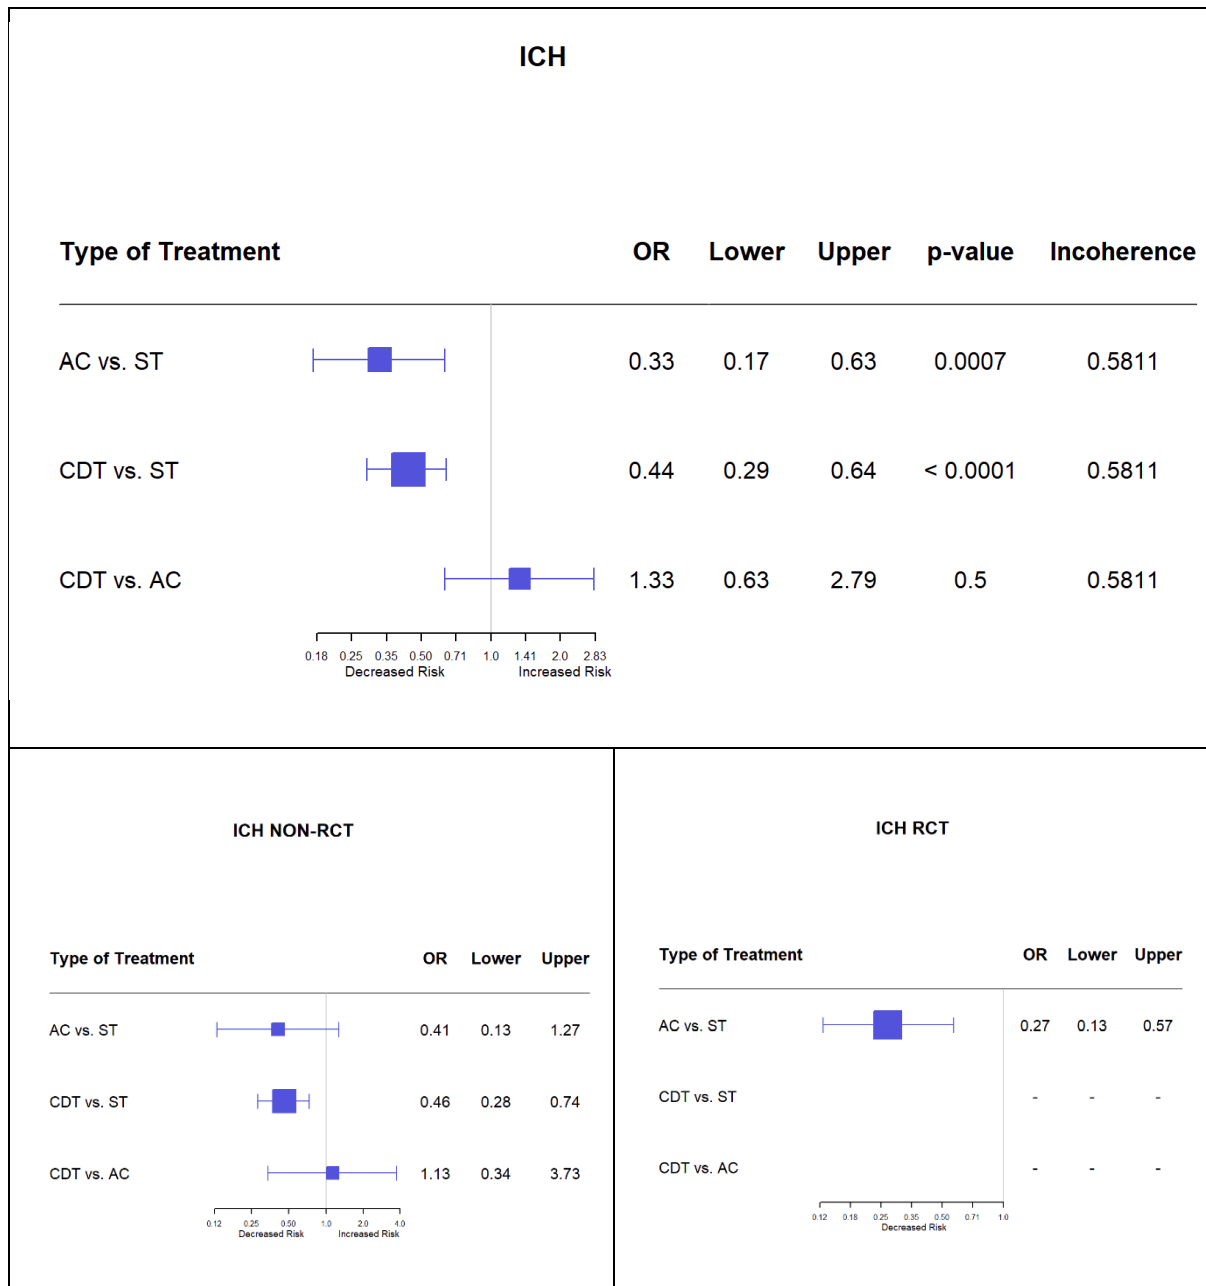

Figure S8: Minor bleeding main and sensitivity forest plots

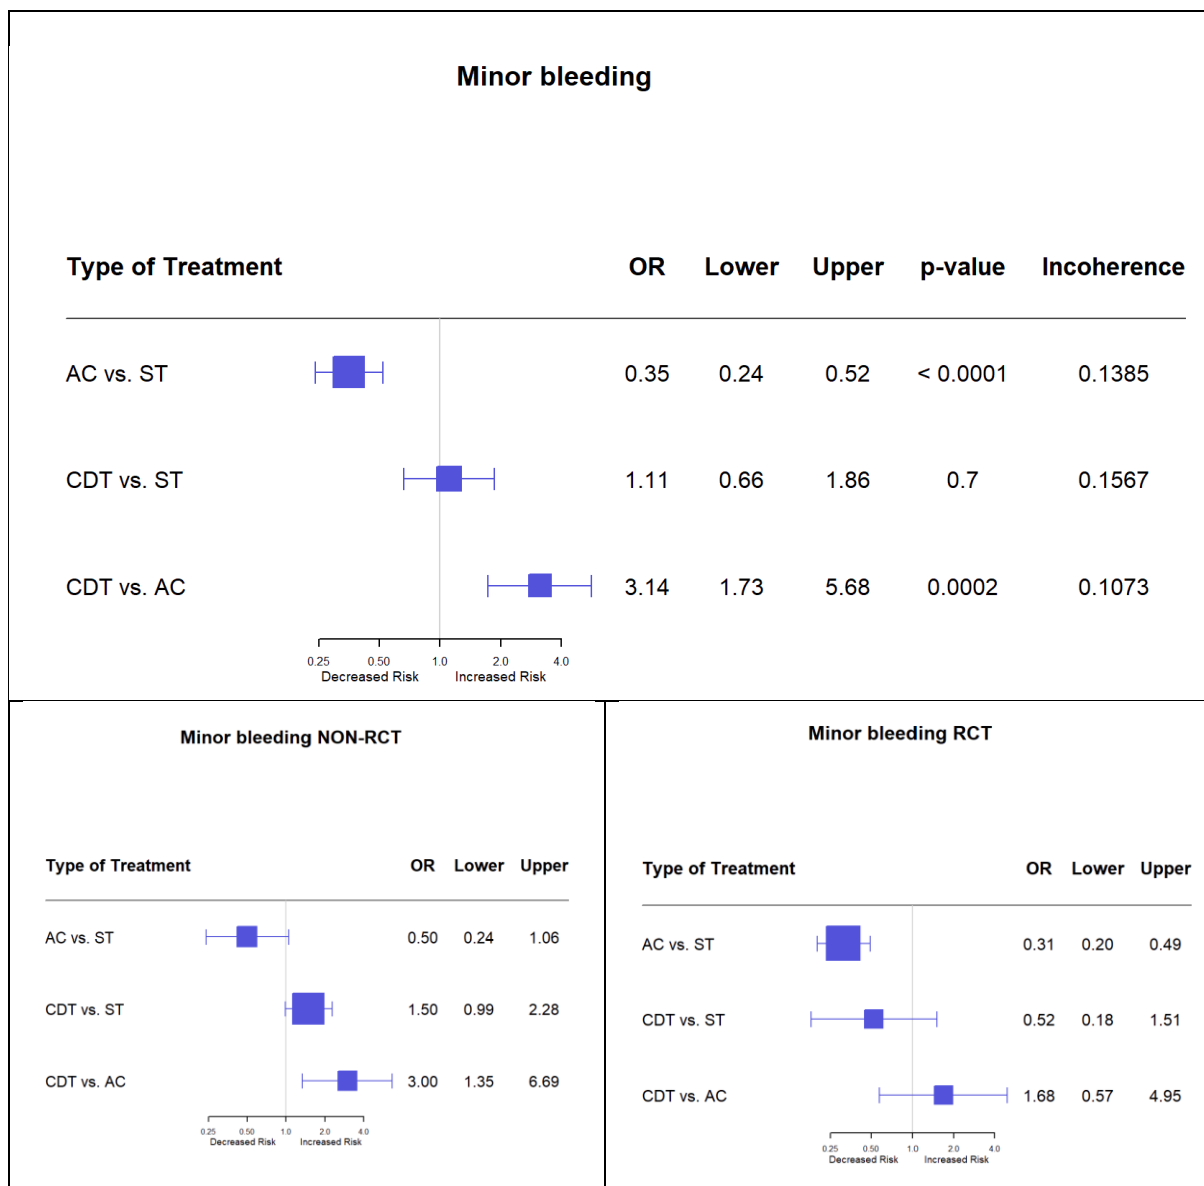

Figure S9: RCT and NON-RCT netgraphs

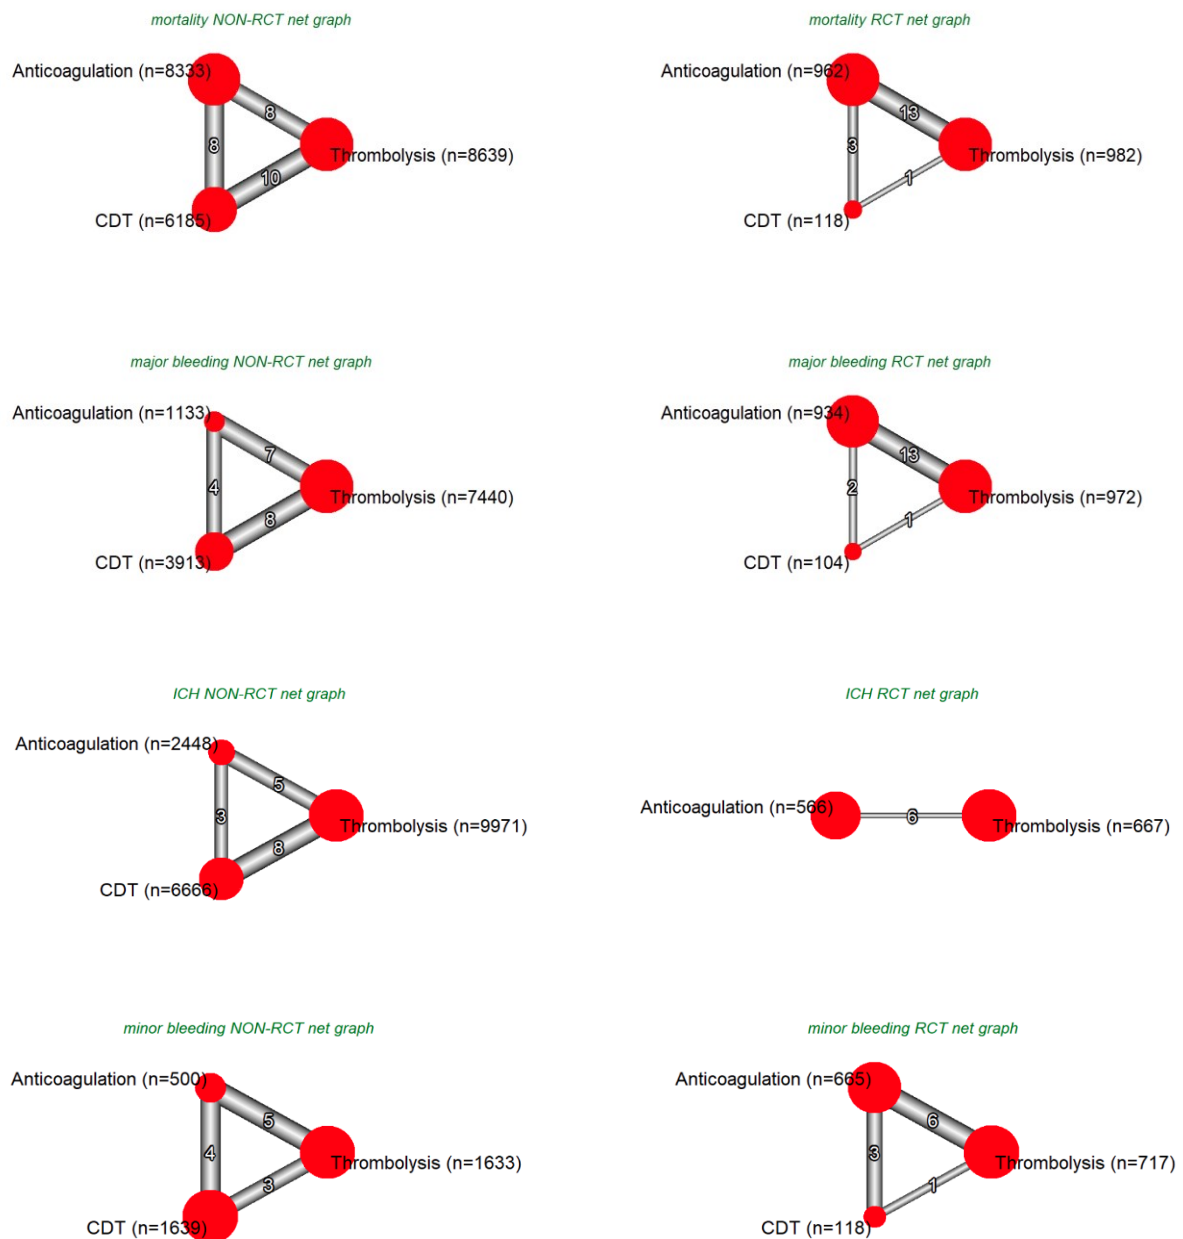

Figure S10: Sensitivity analysis without “unclear” studies:

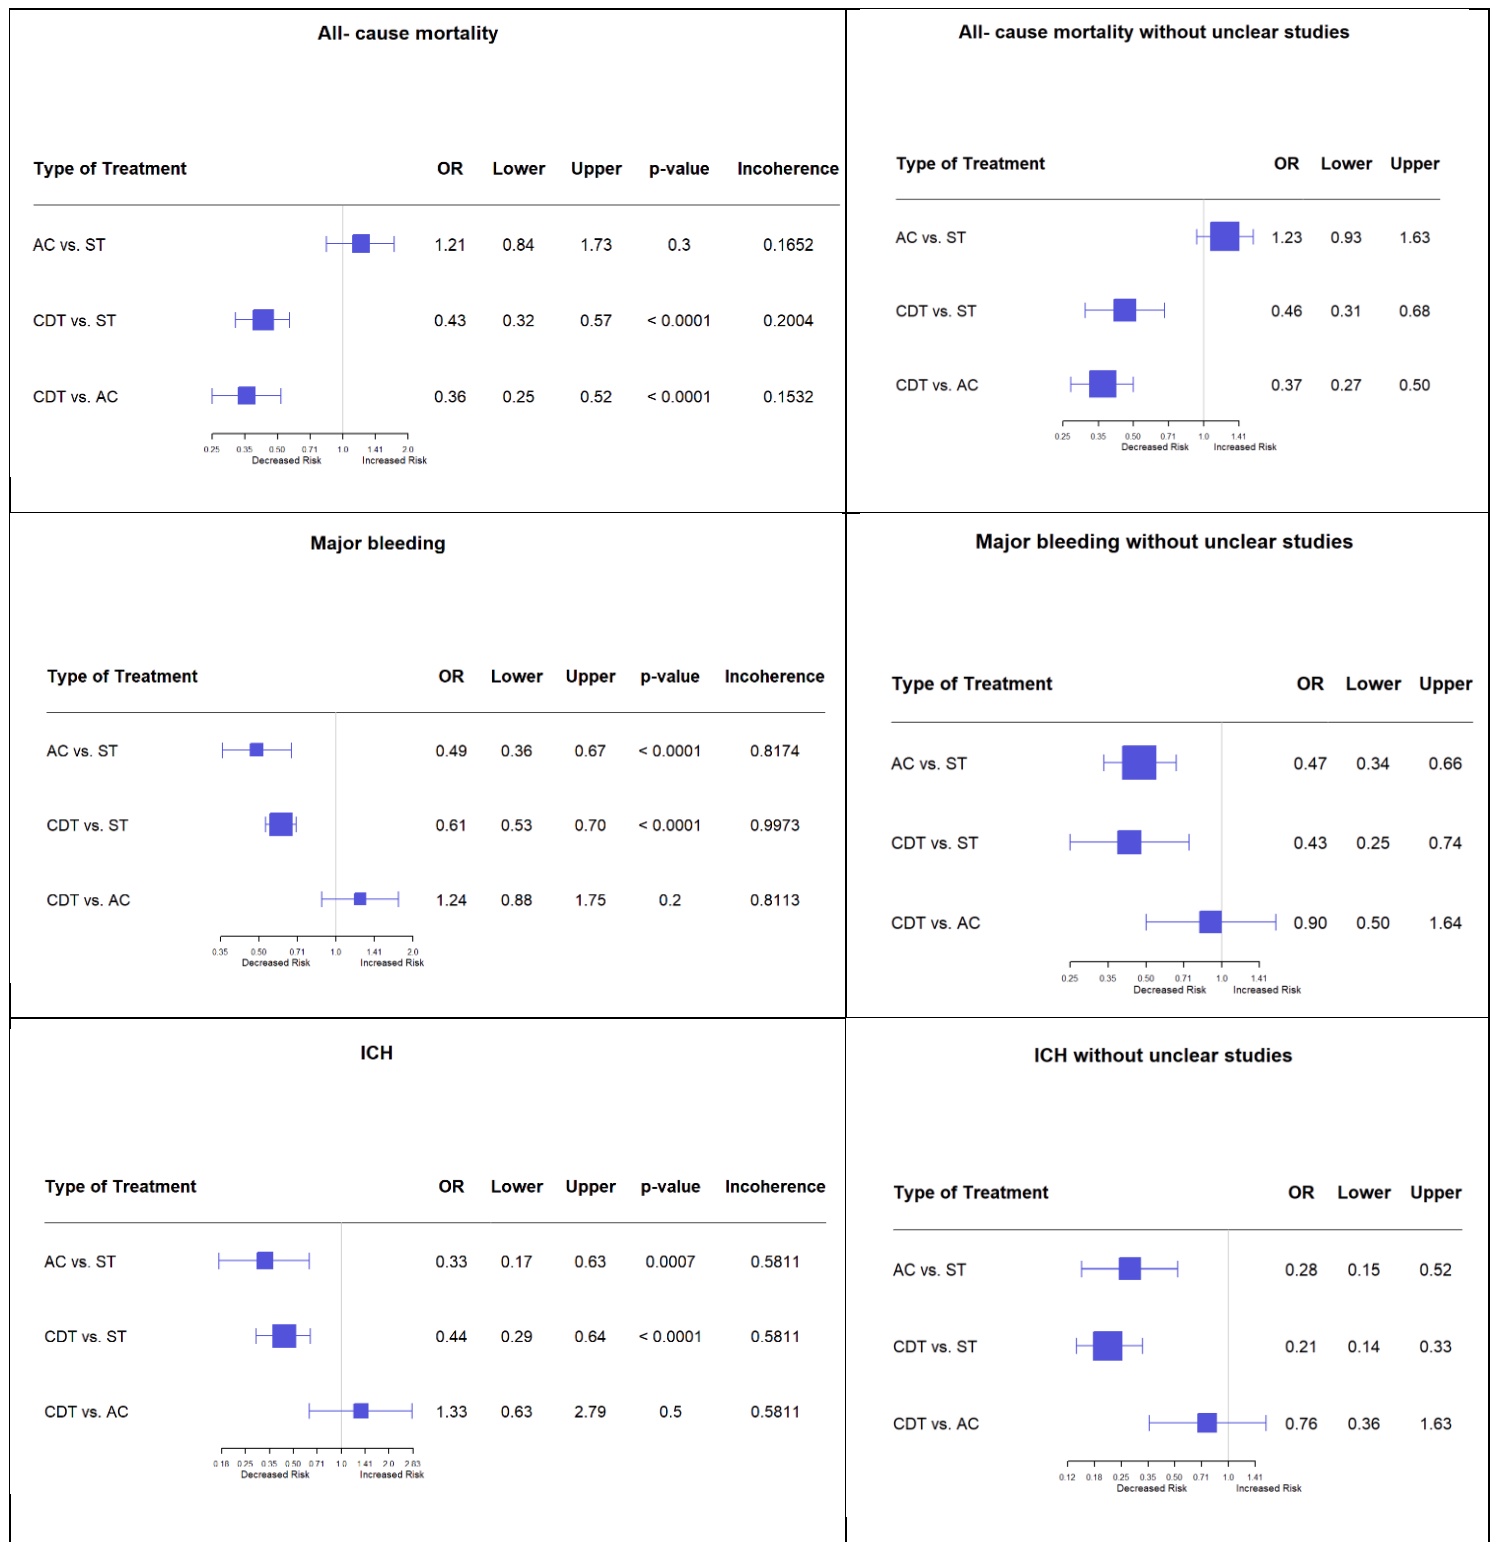



Figure SI I: Sensitivity analysis with excluded studies:

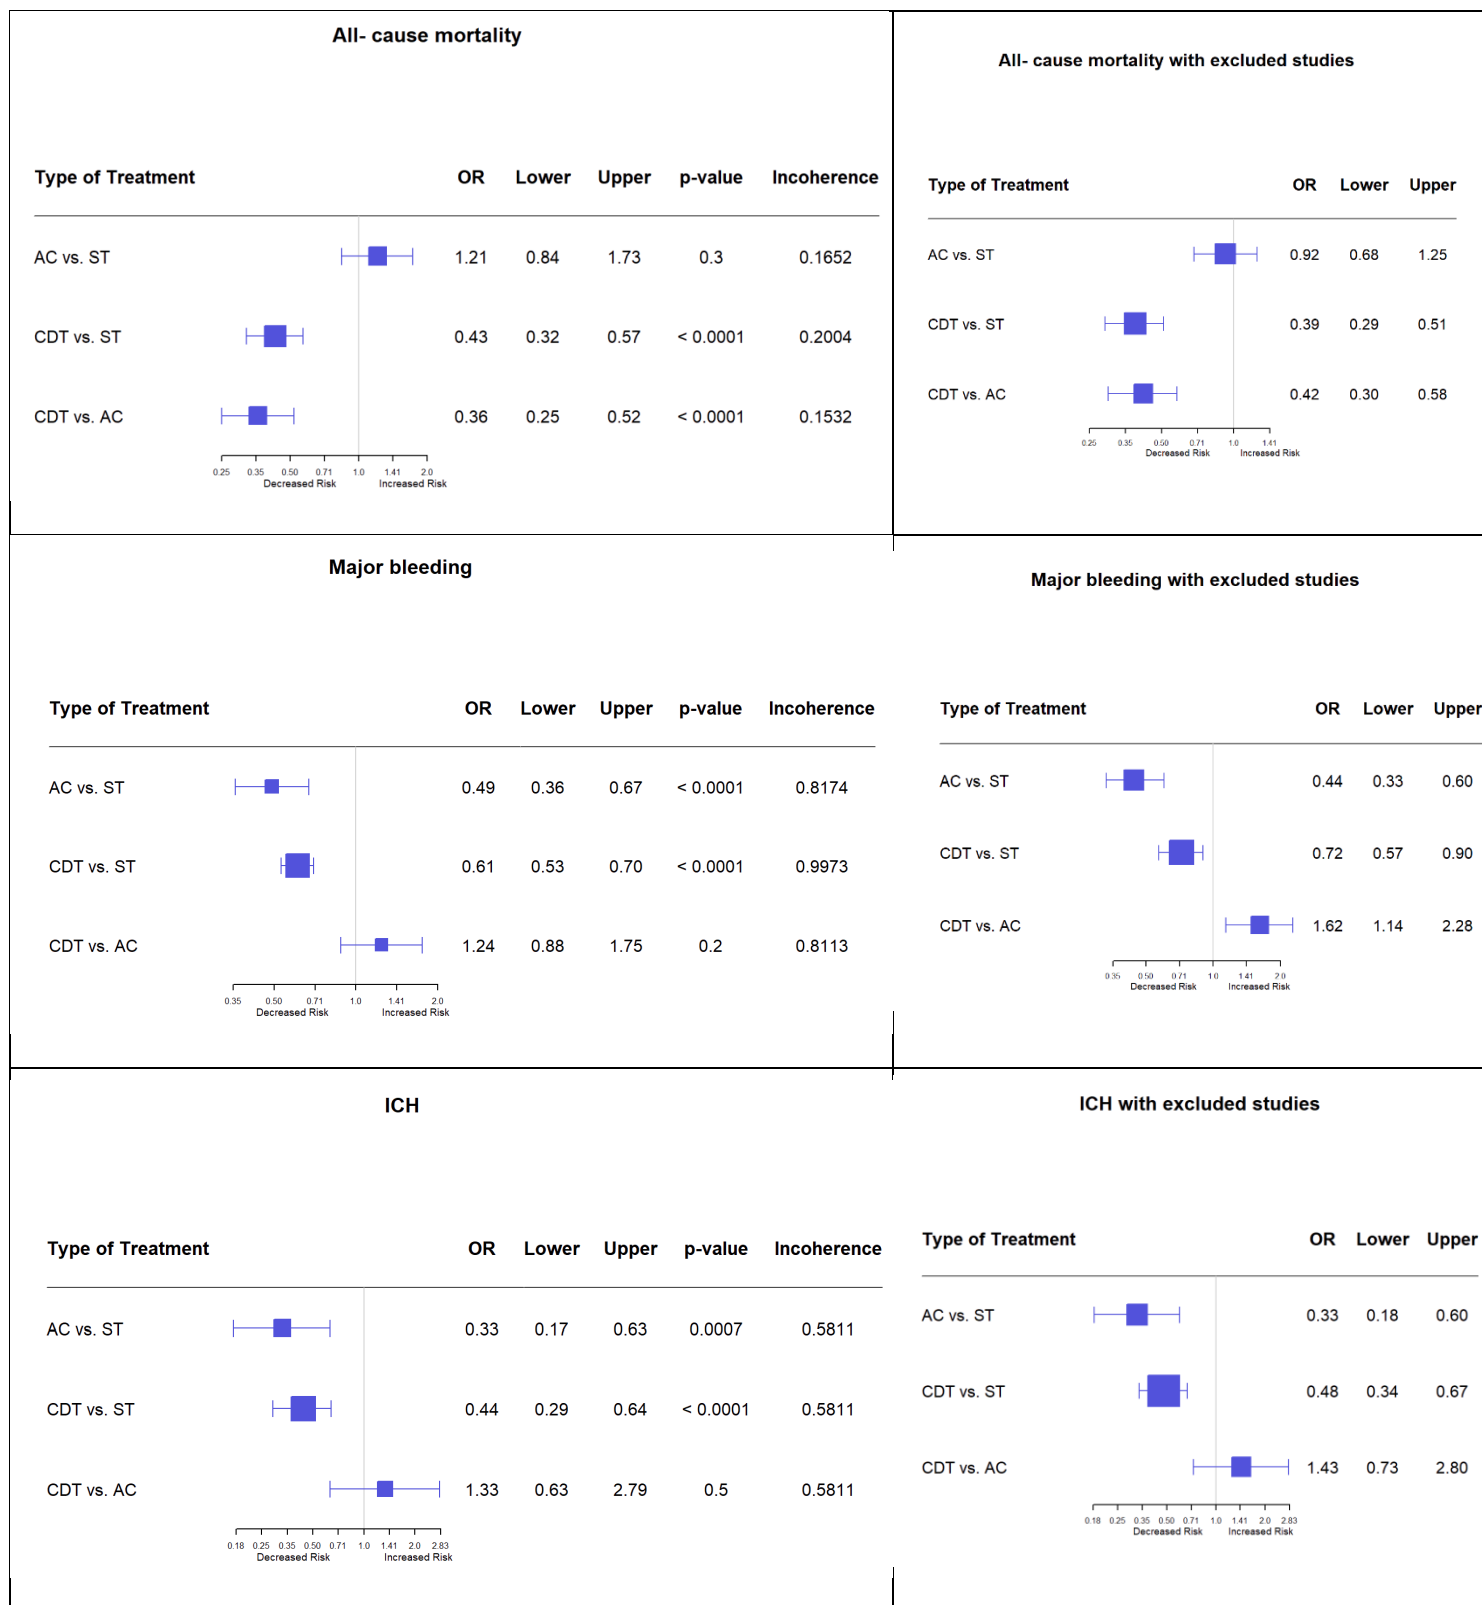

Figure S12: Combined primary outcomes for “intermediate-high” subgroup analysis and p-score.

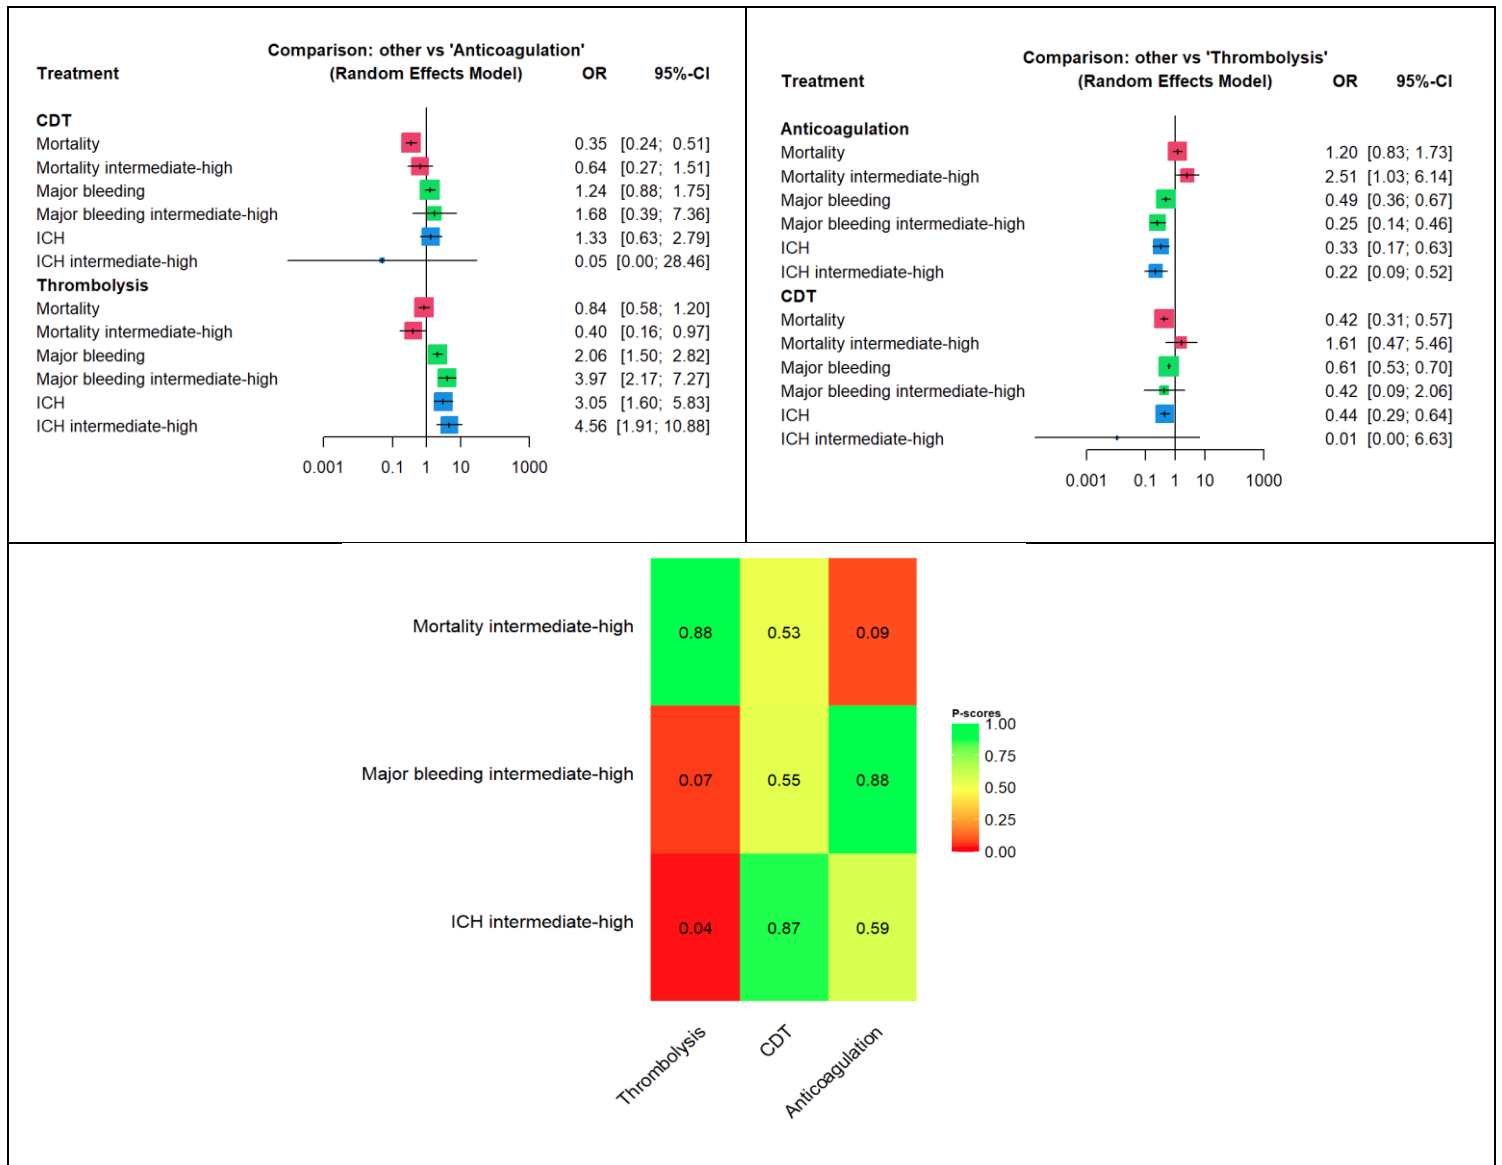

Figure S13: Netgraphs for “intermediate-high” subgroup

*All- cause mortality for “intermediate-high” net graph*

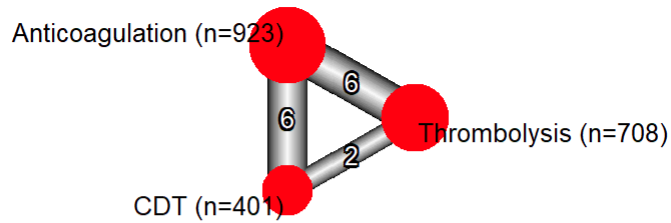

*Major bleeding for “intermediate-high” net graph*

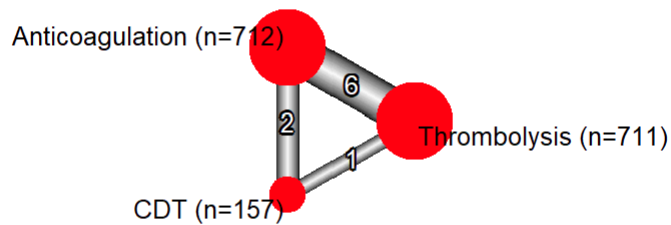

*ICH for “intermediate-high” net graph*

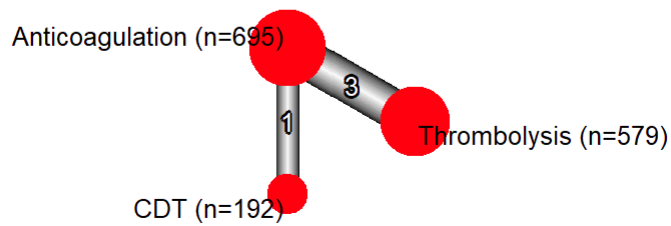

Figure SI4: Funnel plots

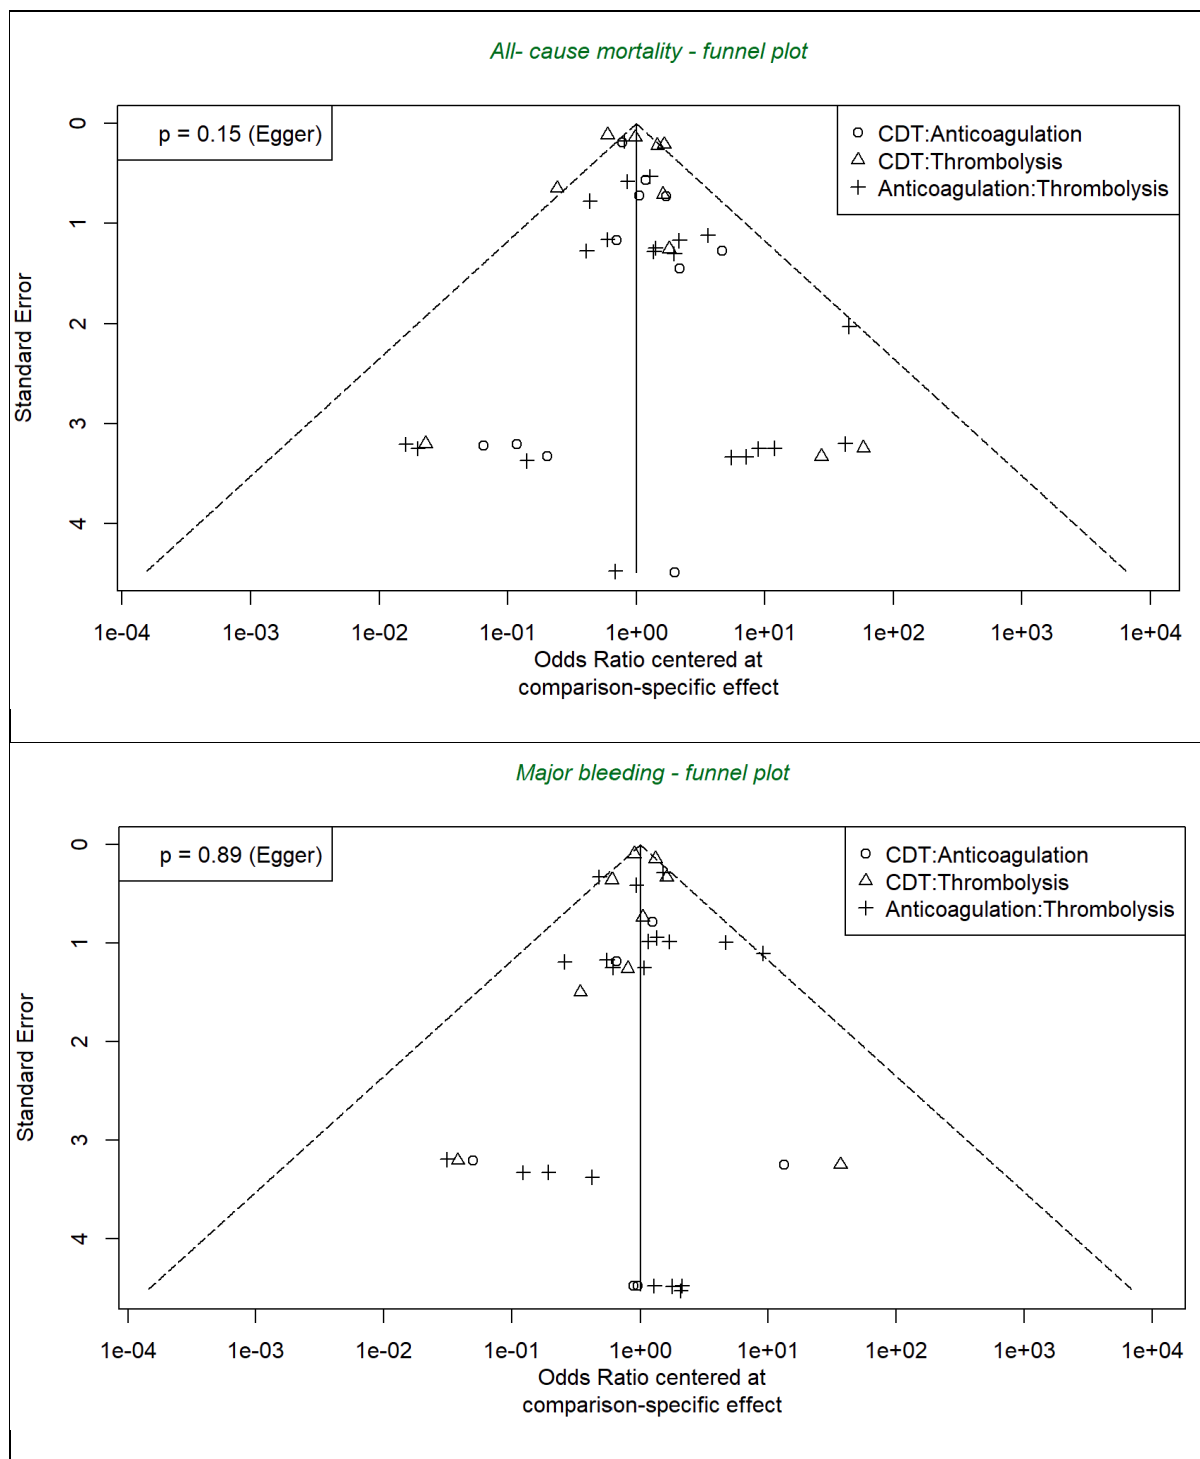

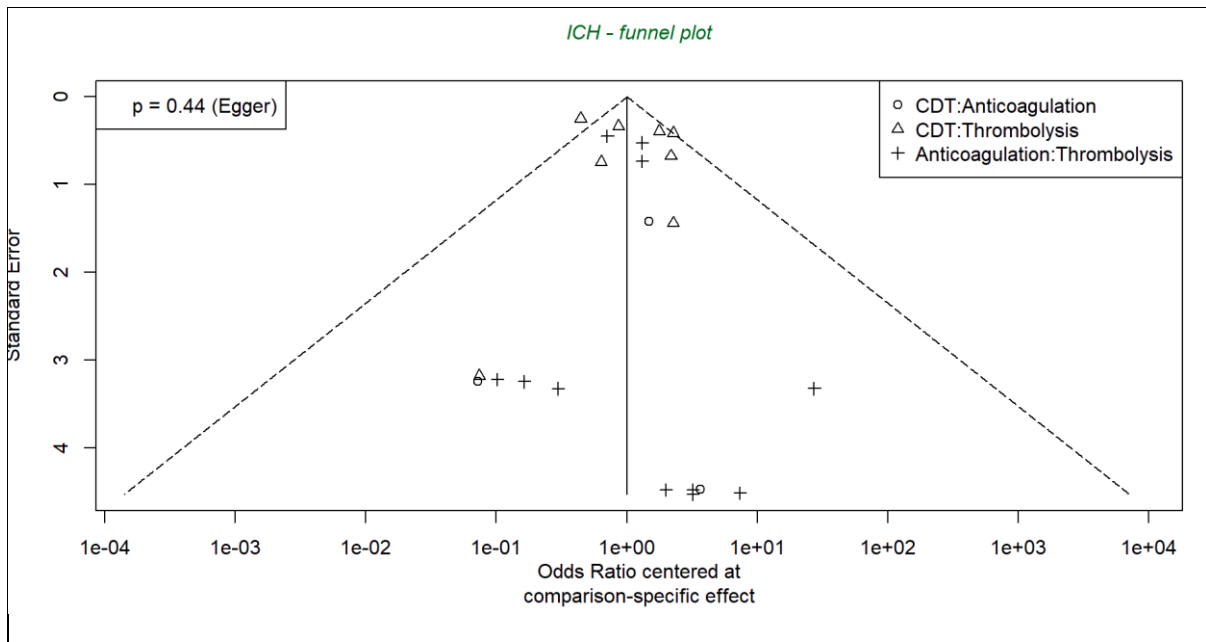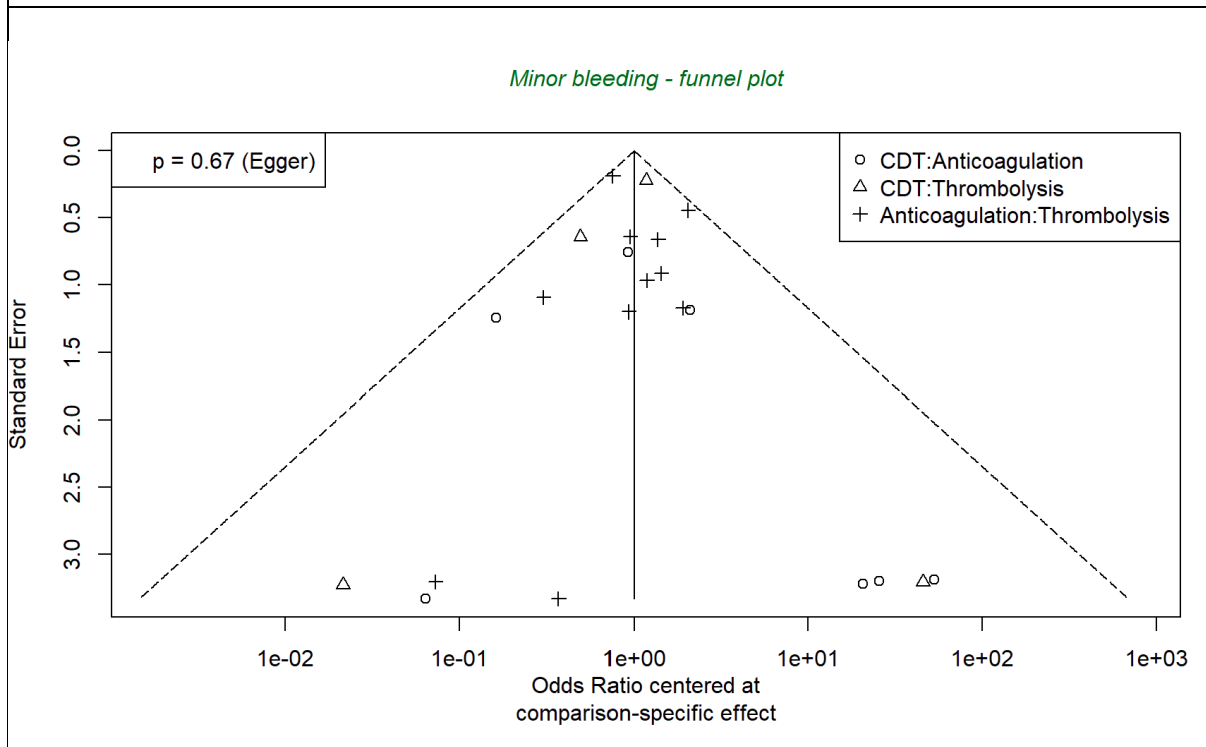

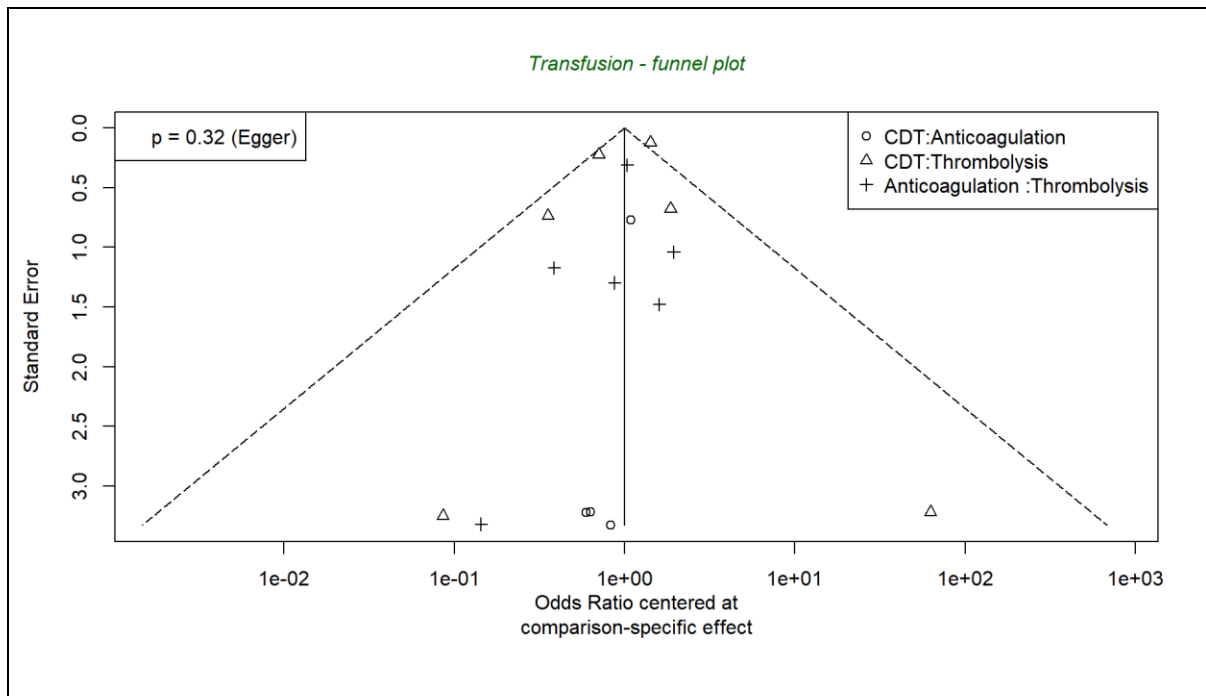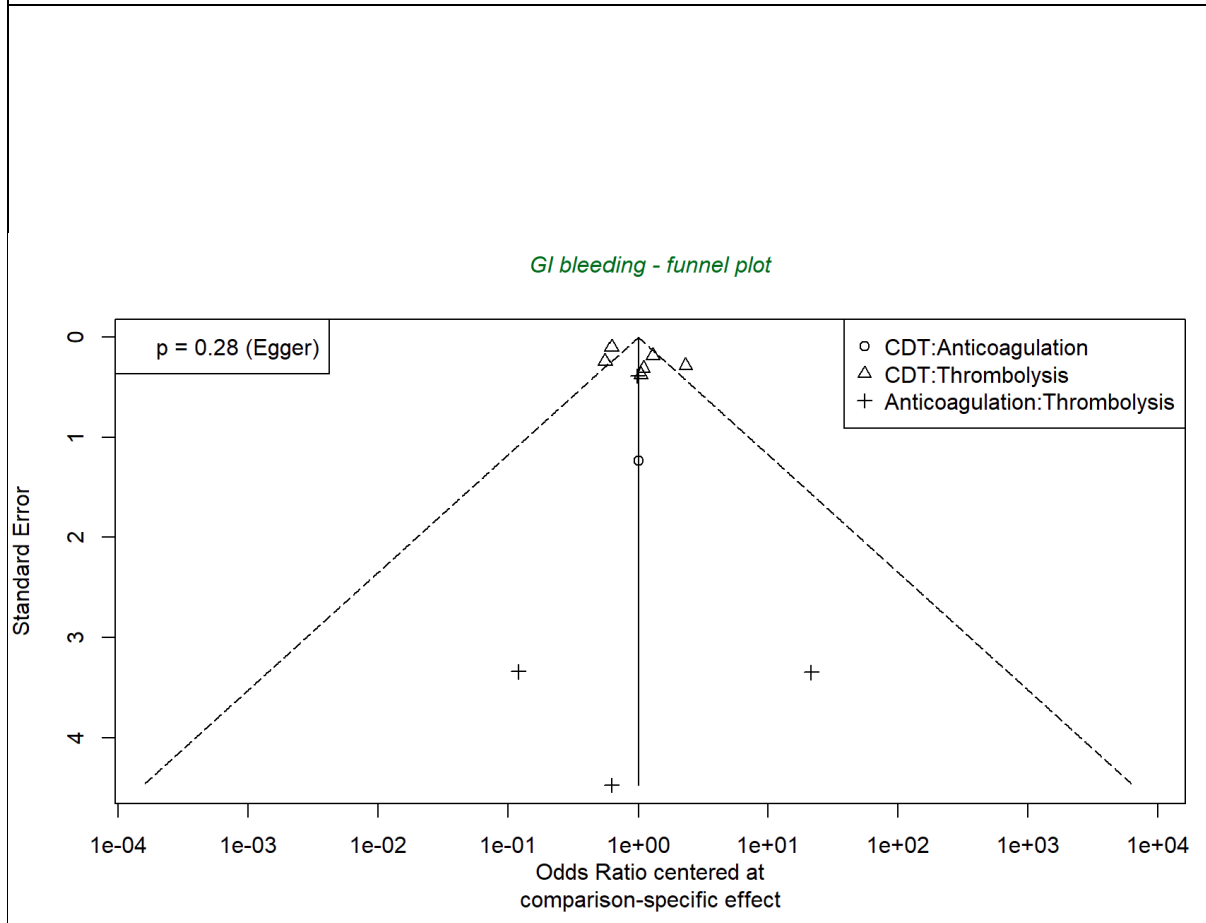

## Figure SI5: Mortality node splitting - direct and indirect evidence in network meta-analysis

Random effects model:

|  | comparison                   | k  | prop | nma    | direct | indir. | RoR    | z     | p-value |
|--|------------------------------|----|------|--------|--------|--------|--------|-------|---------|
|  | CDT:Anticoagulation          | 11 | 0.54 | 0.3563 | 0.4590 | 0.2655 | 1.7284 | 1.43  | 0.1532  |
|  | Thrombolysis:Anticoagulation | 21 | 0.65 | 0.8267 | 0.6851 | 1.1685 | 0.5863 | -1.39 | 0.1652  |
|  | CDT:Thrombolysis             | 11 | 0.84 | 0.4310 | 0.3974 | 0.6554 | 0.6064 | -1.28 | 0.2004  |

Legend:

- comparison - Treatment comparison
- k - Number of studies providing direct evidence
- prop - Direct evidence proportion
- nma - Estimated treatment effect (OR) in network meta-analysis
- direct - Estimated treatment effect (OR) derived from direct evidence
- indir. - Estimated treatment effect (OR) derived from indirect evidence
- RoR - Ratio of Ratios (direct versus indirect)
- z - z-value of test for disagreement (direct versus indirect)
- p-value - p-value of test for disagreement (direct versus indirect)

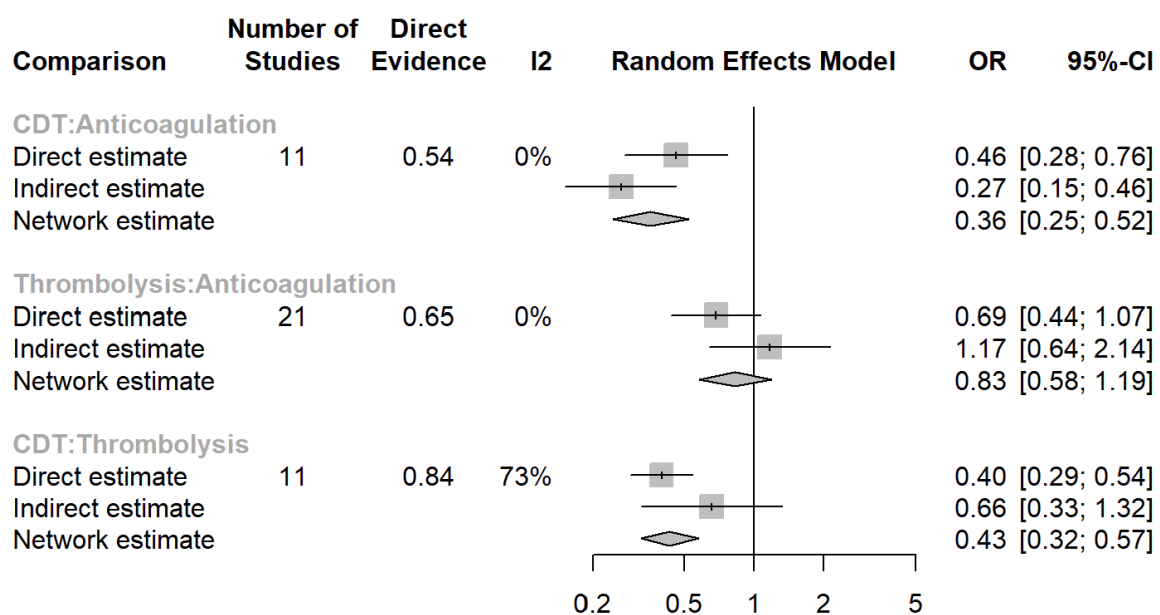

## Figure SI6: Major bleeding node splitting - direct and indirect evidence in network meta-analysis

Random effects model:

| comparison                   | k  | prop | nma    | direct | indir. | RoR    | z     | p-value |
|------------------------------|----|------|--------|--------|--------|--------|-------|---------|
| CDT:Anticoagulation          | 6  | 0.08 | 1.2442 | 1.0855 | 1.2590 | 0.8621 | -0.23 | 0.8174  |
| Thrombolysis:Anticoagulation | 20 | 0.94 | 2.0559 | 2.0759 | 1.7670 | 1.1748 | 0.24  | 0.8113  |
| CDT:Thrombolysis             | 9  | 0.99 | 0.6052 | 0.6052 | 0.6066 | 0.9976 | -0.00 | 0.9973  |

Legend:

- comparison - Treatment comparison
- k - Number of studies providing direct evidence
- prop - Direct evidence proportion
- nma - Estimated treatment effect (OR) in network meta-analysis
- direct - Estimated treatment effect (OR) derived from direct evidence
- indir. - Estimated treatment effect (OR) derived from indirect evidence
- RoR - Ratio of Ratios (direct versus indirect)
- z - z-value of test for disagreement (direct versus indirect)
- p-value - p-value of test for disagreement (direct versus indirect)

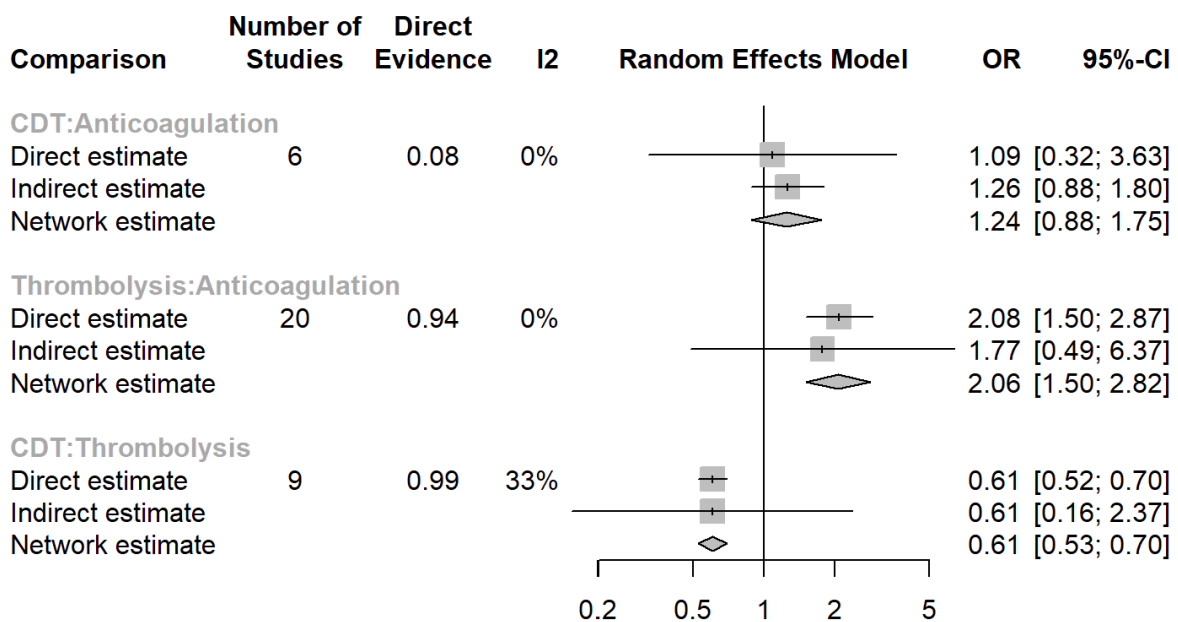



## Figure S17: ICH node splitting - direct and indirect evidence in network meta-analysis

Random effects model:

|  | comparison                   | k  | prop | nma    | direct | indir. | RoR    | z     | p-value |
|--|------------------------------|----|------|--------|--------|--------|--------|-------|---------|
|  | CDT:Anticoagulation          | 3  | 0.09 | 1.3289 | 0.6809 | 1.4184 | 0.4801 | -0.55 | 0.5811  |
|  | Thrombolysis:Anticoagulation | 11 | 0.93 | 3.0527 | 3.2039 | 1.5382 | 2.0829 | 0.55  | 0.5811  |
|  | CDT:Thrombolysis             | 8  | 0.98 | 0.4353 | 0.4427 | 0.2125 | 2.0829 | 0.55  | 0.5811  |

Legend:

- comparison - Treatment comparison
- k - Number of studies providing direct evidence
- prop - Direct evidence proportion
- nma - Estimated treatment effect (OR) in network meta-analysis
- direct - Estimated treatment effect (OR) derived from direct evidence
- indir. - Estimated treatment effect (OR) derived from indirect evidence
- RoR - Ratio of Ratios (direct versus indirect)
- z - z-value of test for disagreement (direct versus indirect)
- p-value - p-value of test for disagreement (direct versus indirect)

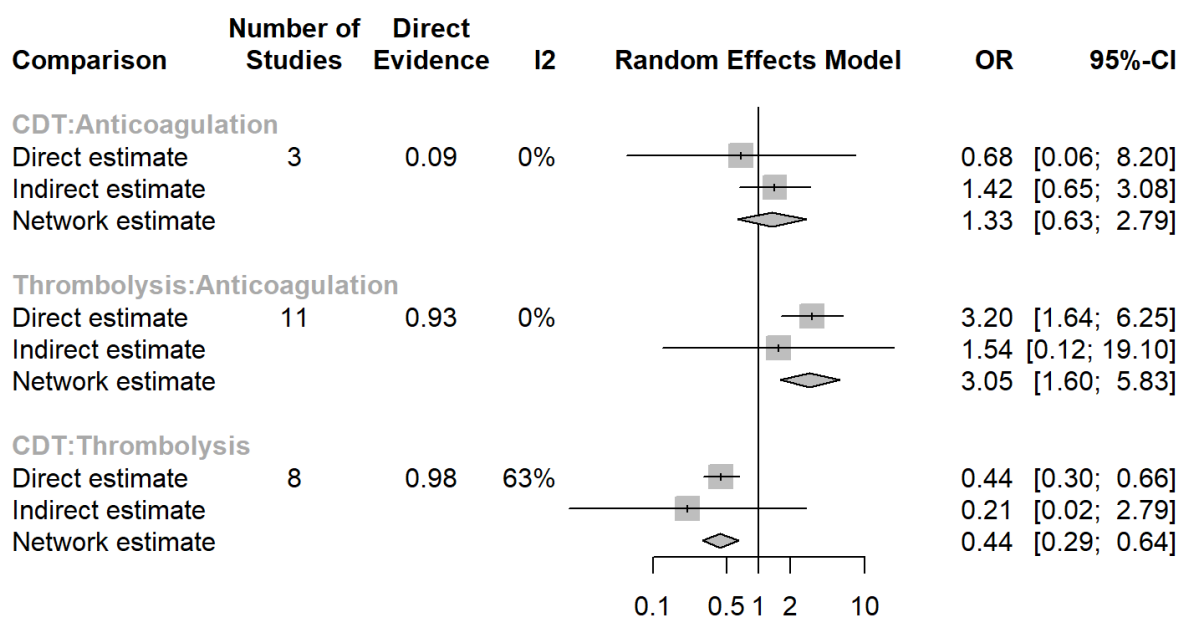

## Figure SI8: Minor bleeding node splitting - direct and indirect evidence in network meta-analysis

Separate indirect from direct evidence (SIDE) using back-calculation method

Common effects model:

| comparison                   | k  | prop | nma    | direct | indir. | RoR    | z     | p-value |
|------------------------------|----|------|--------|--------|--------|--------|-------|---------|
| CDT:Anticoagulation          | 7  | 0.19 | 3.9660 | 1.4752 | 4.9901 | 0.2956 | -2.05 | 0.0404  |
| Thrombolysis:Anticoagulation | 11 | 0.94 | 3.1747 | 3.4202 | 1.0743 | 3.1835 | 1.93  | 0.0538  |
| CDT:Thrombolysis             | 4  | 0.88 | 1.2492 | 1.4286 | 0.4641 | 3.0784 | 1.87  | 0.0613  |

Random effects model:

| comparison                   | k  | prop | nma    | direct | indir. | RoR    | z     | p-value |
|------------------------------|----|------|--------|--------|--------|--------|-------|---------|
| CDT:Anticoagulation          | 7  | 0.30 | 3.1365 | 1.4880 | 4.3125 | 0.3450 | -1.61 | 0.1073  |
| Thrombolysis:Anticoagulation | 11 | 0.90 | 2.8229 | 3.1070 | 1.1571 | 2.6851 | 1.48  | 0.1385  |
| CDT:Thrombolysis             | 4  | 0.81 | 1.1111 | 1.3343 | 0.5189 | 2.5712 | 1.42  | 0.1567  |

Legend:

- comparison - Treatment comparison
- k - Number of studies providing direct evidence
- prop - Direct evidence proportion
- nma - Estimated treatment effect (OR) in network meta-analysis
- direct - Estimated treatment effect (OR) derived from direct evidence
- indir. - Estimated treatment effect (OR) derived from indirect evidence
- RoR - Ratio of Ratios (direct versus indirect)
- z - z-value of test for disagreement (direct versus indirect)
- p-value - p-value of test for disagreement (direct versus indirect)

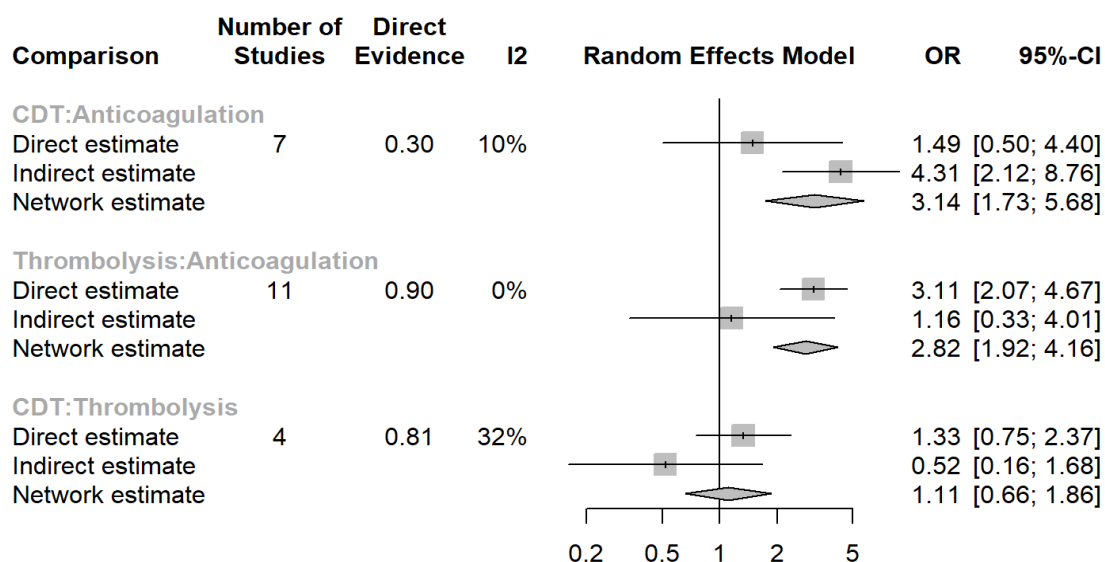

## Figure SI9: Transfusion node splitting - direct and indirect evidence in network meta-analysis

Separate indirect from direct evidence (SIDE) using back-calculation method

Common effects model:

|  | comparison                   | k | prop | nma    | direct | indir. | RoR    | z     | p-value |
|--|------------------------------|---|------|--------|--------|--------|--------|-------|---------|
|  | CDT:Anticoagulation          | 4 | 0.15 | 0.6808 | 0.1169 | 0.9229 | 0.1267 | -2.68 | 0.0074  |
|  | Thrombolysis:Anticoagulation | 6 | 0.87 | 1.0920 | 1.4251 | 0.1805 | 7.8957 | 2.68  | 0.0074  |
|  | CDT:Thrombolysis             | 6 | 0.98 | 0.6234 | 0.6476 | 0.0820 | 7.8957 | 2.68  | 0.0074  |

Random effects model:

|  | comparison                   | k | prop | nma    | direct | indir. | RoR    | z     | p-value |
|--|------------------------------|---|------|--------|--------|--------|--------|-------|---------|
|  | CDT:Anticoagulation          | 4 | 0.27 | 0.4684 | 0.1152 | 0.7891 | 0.1460 | -2.08 | 0.0379  |
|  | Thrombolysis:Anticoagulation | 6 | 0.82 | 1.0185 | 1.4522 | 0.2120 | 6.8500 | 2.08  | 0.0379  |
|  | CDT:Thrombolysis             | 6 | 0.91 | 0.4599 | 0.5433 | 0.0793 | 6.8500 | 2.08  | 0.0379  |

Legend:

- comparison - Treatment comparison
- k - Number of studies providing direct evidence
- prop - Direct evidence proportion
- nma - Estimated treatment effect (OR) in network meta-analysis
- direct - Estimated treatment effect (OR) derived from direct evidence
- indir. - Estimated treatment effect (OR) derived from indirect evidence
- RoR - Ratio of Ratios (direct versus indirect)
- z - z-value of test for disagreement (direct versus indirect)
- p-value - p-value of test for disagreement (direct versus indirect)

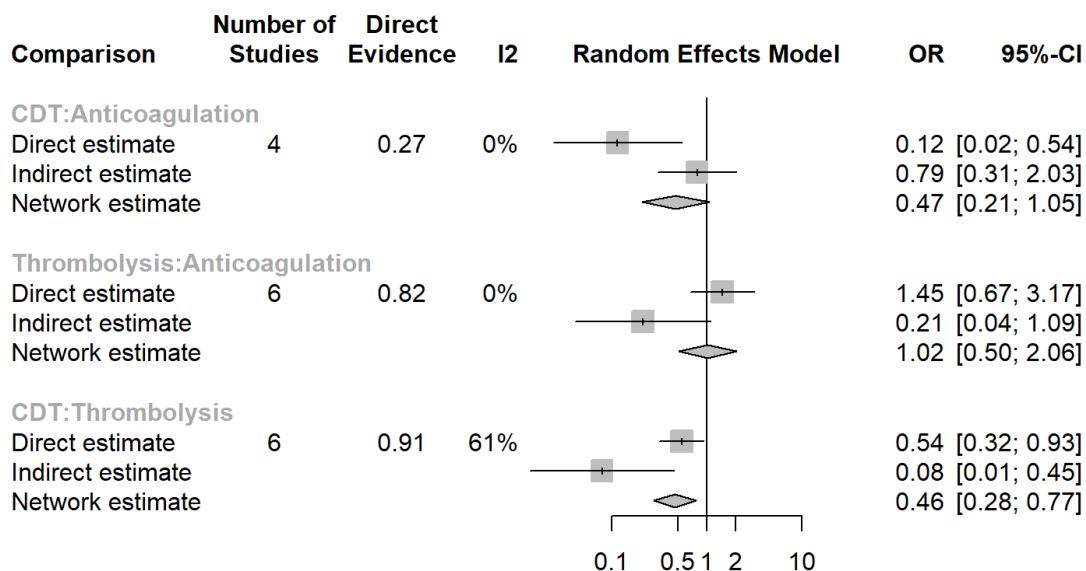

## Figure S20: GI node splitting - direct and indirect evidence in network meta-analysis

Separate indirect from direct evidence (SIDE) using back-calculation method

Random effects model:

| comparison                   | k | prop | nma    | direct | indir. | RoR    | z     | p-value |
|------------------------------|---|------|--------|--------|--------|--------|-------|---------|
| CDT:Anticoagulation          | 1 | 0.18 | 0.8502 | 0.4949 | 0.9545 | 0.5185 | -0.45 | 0.6496  |
| Thrombolysis:Anticoagulation | 4 | 0.85 | 0.9114 | 1.0091 | 0.5232 | 1.9287 | 0.45  | 0.6496  |
| CDT:Thrombolysis             | 6 | 0.98 | 0.9329 | 0.9459 | 0.4904 | 1.9287 | 0.45  | 0.6496  |

Legend:

- comparison - Treatment comparison
- k - Number of studies providing direct evidence
- prop - Direct evidence proportion
- nma - Estimated treatment effect (OR) in network meta-analysis
- direct - Estimated treatment effect (OR) derived from direct evidence
- indir. - Estimated treatment effect (OR) derived from indirect evidence
- RoR - Ratio of Ratios (direct versus indirect)
- z - z-value of test for disagreement (direct versus indirect)
- p-value - p-value of test for disagreement (direct versus indirect)

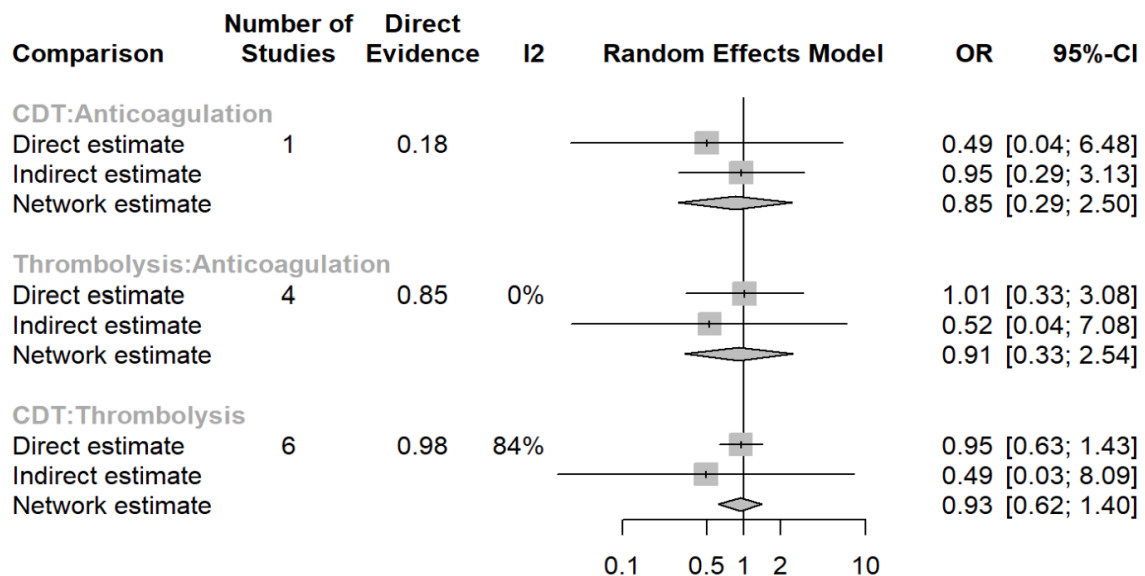

Figure S2I: Mortality pairwise forest plot

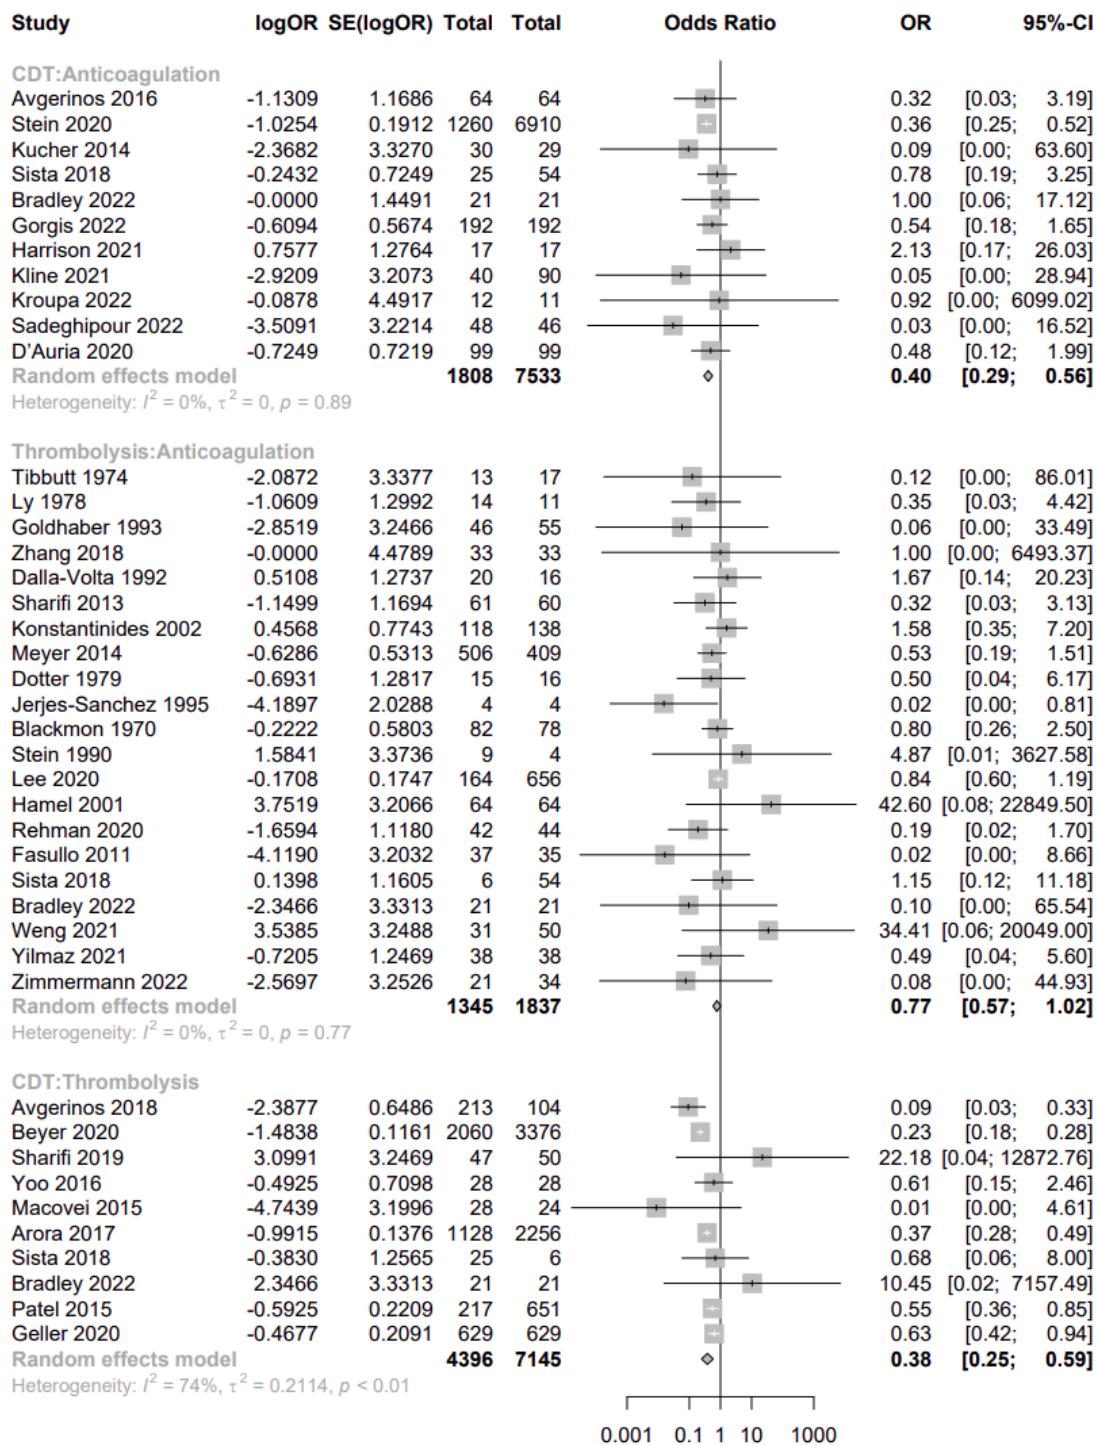

Figure S22: Major bleeding pairwise forest plot

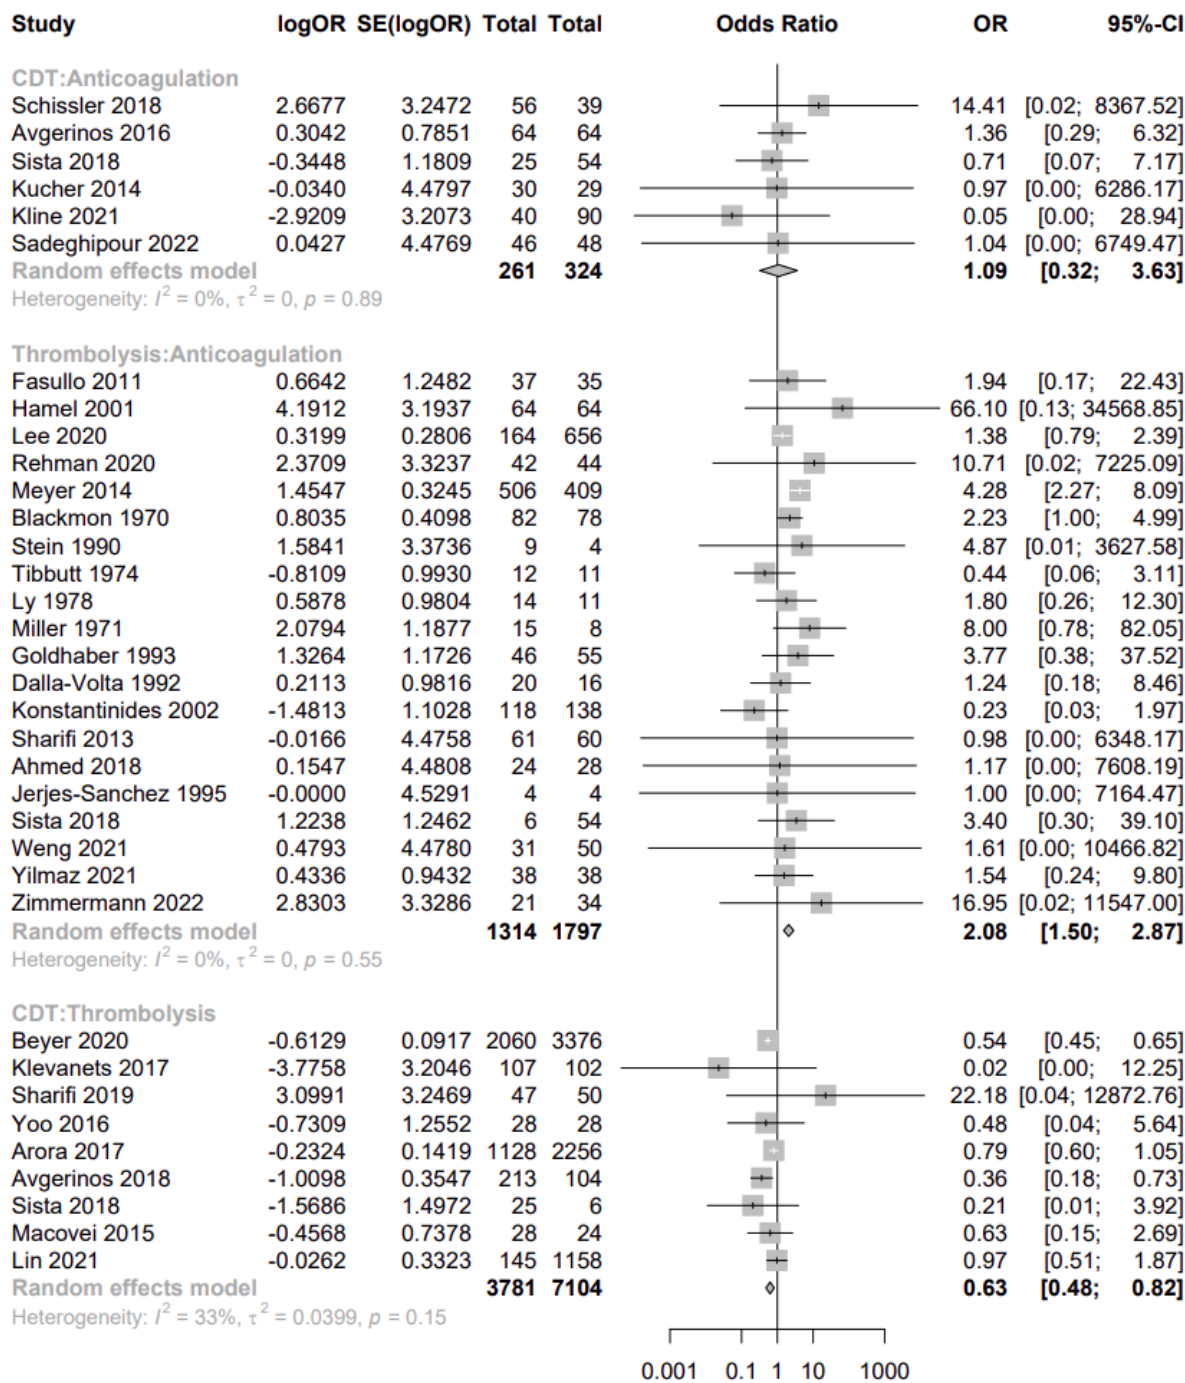

Figure S23: ICH pairwise forest plot

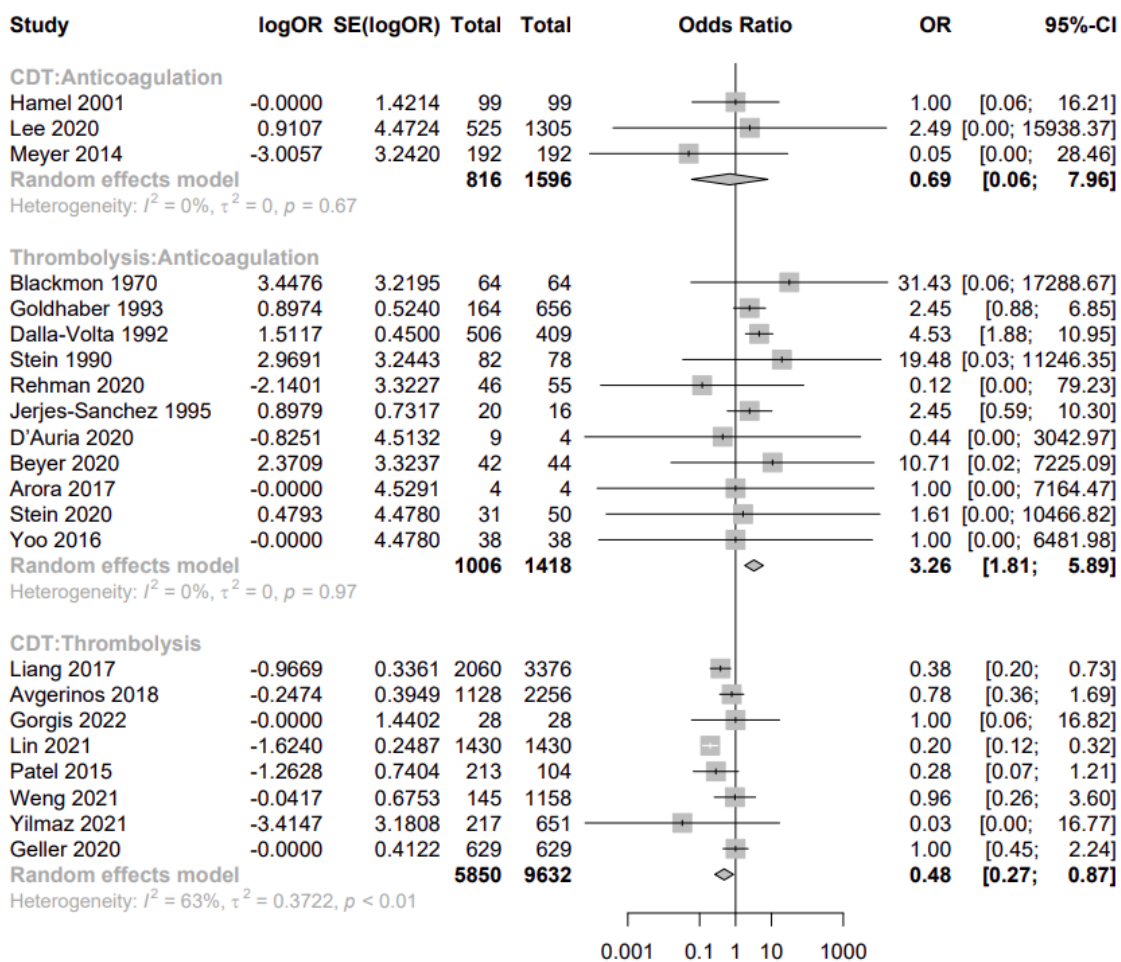

Figure S24: Minor bleeding pairwise forest plot

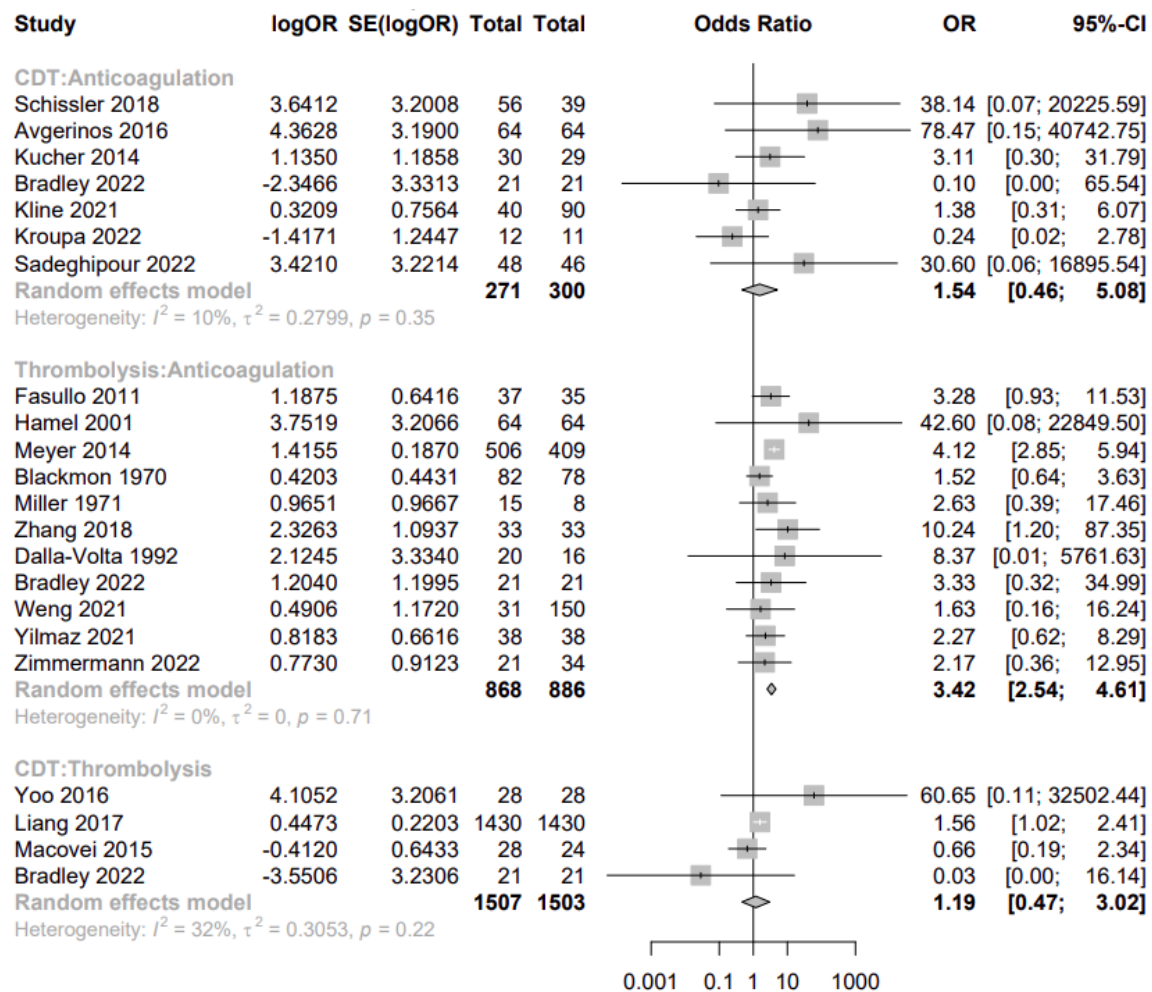



Figure S25: Transfusion pairwise forest plot

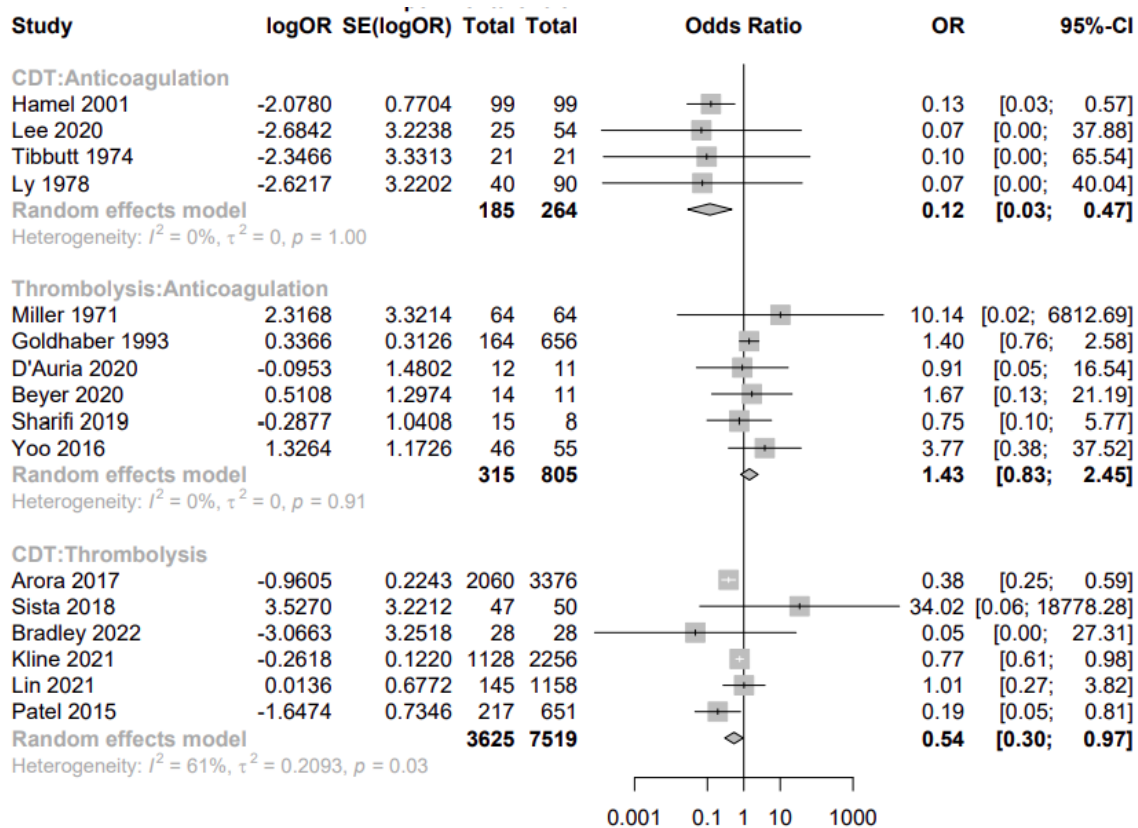

Figure S26: GI pairwise forest plot

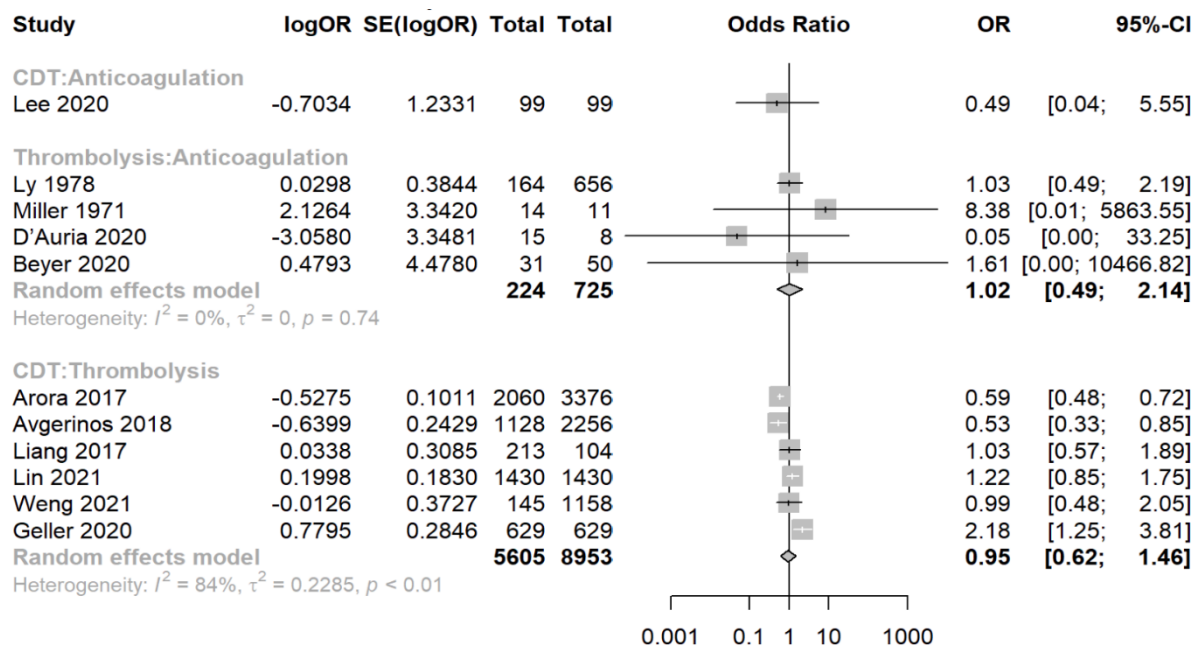

**Table S2: summary key characteristics of treatment comparisons**

| Key characteristic                   | Thrombolysis vs Anticoagulation | CDT vs Anticoagulation | CDT vs Thrombolysis  |
|--------------------------------------|---------------------------------|------------------------|----------------------|
| <b>All studies</b>                   |                                 |                        |                      |
| Number of studies <sup>1</sup>       | 23                              | 12                     | 13                   |
| n                                    | 3,347                           | 3,105                  | 15,929               |
| Mean age                             | 59.6                            | 61.3                   | 58.8                 |
| Mean male (%)                        | 48.3                            | 52.8                   | 49.62                |
| Mean O <sub>2</sub> saturation (%)   | 89.3                            | 94.7                   | 90.03                |
| Mean heart rate mean (beats per min) | 101.7                           | 99.8                   | 100.3                |
| Mean systolic blood pressure (mm Hg) | 124.7                           | 130.3                  | Data is insufficient |
| Cancer                               | 16%                             | 7%                     | 8%                   |
| History of VTE\PE                    | 18%                             | 24%                    | 20%                  |
| Immobilization                       | 16%                             | 22%                    | Data is              |
| Hypercoagulable condition            | 13%                             | Data is insufficient   | 15%                  |
| Recent surgery                       | 8%                              | 10%                    | 10%                  |
| <b>RCTs</b>                          |                                 |                        |                      |
| Number of trails                     | 15                              | 3                      | 1                    |
| n                                    | 1,999                           | 176                    | 52                   |
| <b>Observational studies</b>         |                                 |                        |                      |
| Number of studies                    | 8                               | 9                      | 12                   |
| n                                    | 1,394                           | 2,956                  | 15,952               |
| <b>Intermediate-High</b>             |                                 |                        |                      |
| Number of studies                    | 7                               | 6                      | 2                    |
| Total n                              | 1,414                           | 726                    | 160                  |
| Number of RCTs                       | 3                               | 2                      | 0                    |
| RCT n                                | 1,129                           | 117                    | 0                    |
| Number of cohorts                    | 4                               | 4                      | 2                    |
| Cohort n                             | 285                             | 609                    | 160                  |

<sup>1</sup> There are two studies with three arms (Sista 2018 and Bradley 2022)

Figure S27: P-score ranking for main and secondary outcomes.

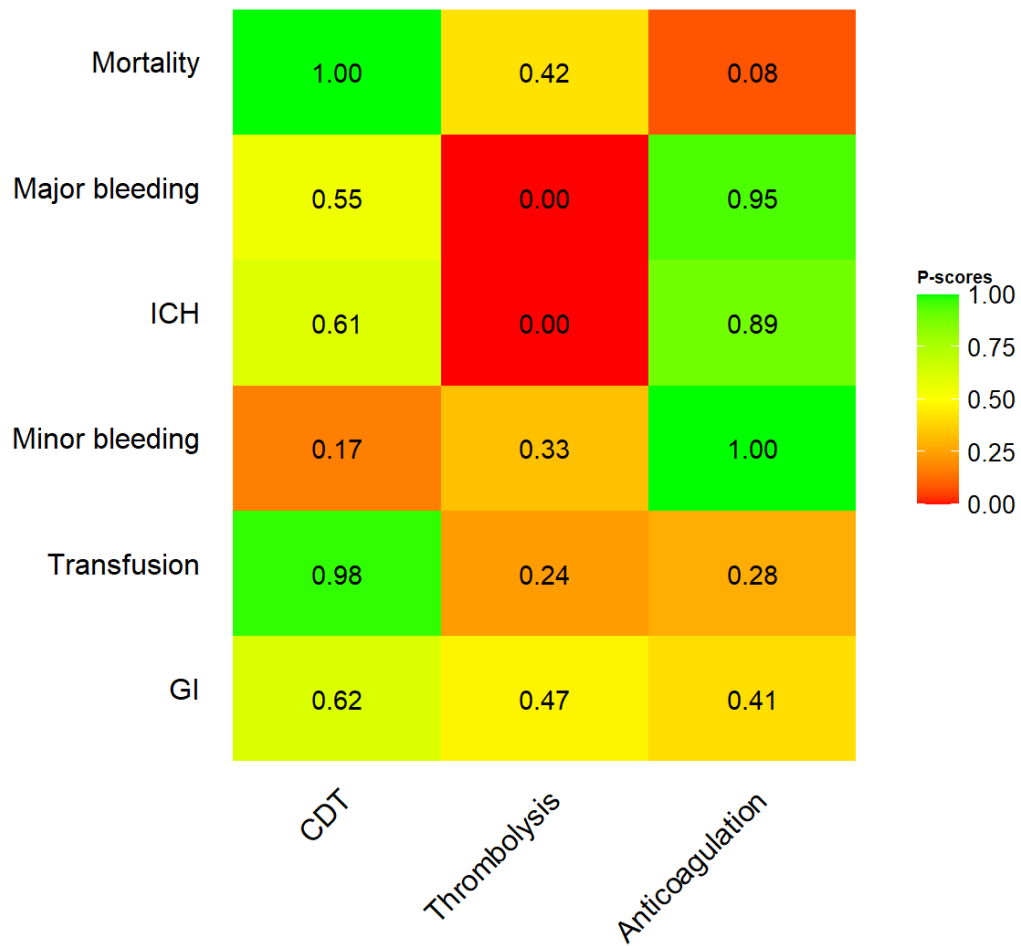

Figure S28: Risk of bias assessment for randomized control studies, evaluated by the Cochrane Collaboration's Risk of Bias Tool

|                     | Random sequence generation (selection bias) | Allocation concealment (selection bias) | Blinding of participants and personnel (performance bias) | Blinding of outcome assessment (detection bias) | Incomplete outcome data (attrition bias) | Selective reporting (reporting bias) | Other bias |
|---------------------|---------------------------------------------|-----------------------------------------|-----------------------------------------------------------|-------------------------------------------------|------------------------------------------|--------------------------------------|------------|
| Ahmed 2018          | +                                           | +                                       | -                                                         | -                                               | +                                        | +                                    | ?          |
| Blackmon 1970       | +                                           | +                                       | +                                                         | +                                               | +                                        | +                                    | +          |
| Dalla-Volta 1992    | +                                           | +                                       | ?                                                         | ?                                               | +                                        | +                                    | ?          |
| Dotter 1979         | +                                           | +                                       | ?                                                         | +                                               | +                                        | +                                    | ?          |
| Fasullo 2011        | +                                           | +                                       | +                                                         | +                                               | +                                        | +                                    | ?          |
| Goldhaber 1993      | +                                           | +                                       | ?                                                         | +                                               | +                                        | +                                    | +          |
| Jerjes-Sanchez 1995 | +                                           | +                                       | -                                                         | +                                               | +                                        | +                                    | ?          |
| Konstantinides 2002 | ?                                           | ?                                       | +                                                         | +                                               | +                                        | +                                    | ?          |
| Kroupa 2022         | +                                           | +                                       | -                                                         | -                                               | +                                        | ?                                    | ?          |
| Kucher 2014         | +                                           | +                                       | -                                                         | ?                                               | +                                        | +                                    | ?          |
| Ly 1978             | +                                           | +                                       | +                                                         | ?                                               | -                                        | +                                    | ?          |
| Macovei 2015        | +                                           | +                                       | ?                                                         | +                                               | +                                        | +                                    | ?          |
| Meyer 2014          | +                                           | +                                       | +                                                         | +                                               | +                                        | +                                    | +          |
| Miller 1971         | -                                           | -                                       | ?                                                         | ?                                               | +                                        | +                                    | ?          |
| Sadeghipour 2022    | +                                           | +                                       | -                                                         | -                                               | +                                        | ?                                    | ?          |
| Sharifi 2013        | +                                           | +                                       | +                                                         | ?                                               | +                                        | +                                    | +          |
| Stein 1990          | +                                           | +                                       | +                                                         | +                                               | +                                        | +                                    | ?          |
| Tibbutt 1974        | ?                                           | ?                                       | +                                                         | +                                               | +                                        | +                                    | ?          |
| Zhang 2018          | +                                           | +                                       | +                                                         | +                                               | +                                        | +                                    | ?          |

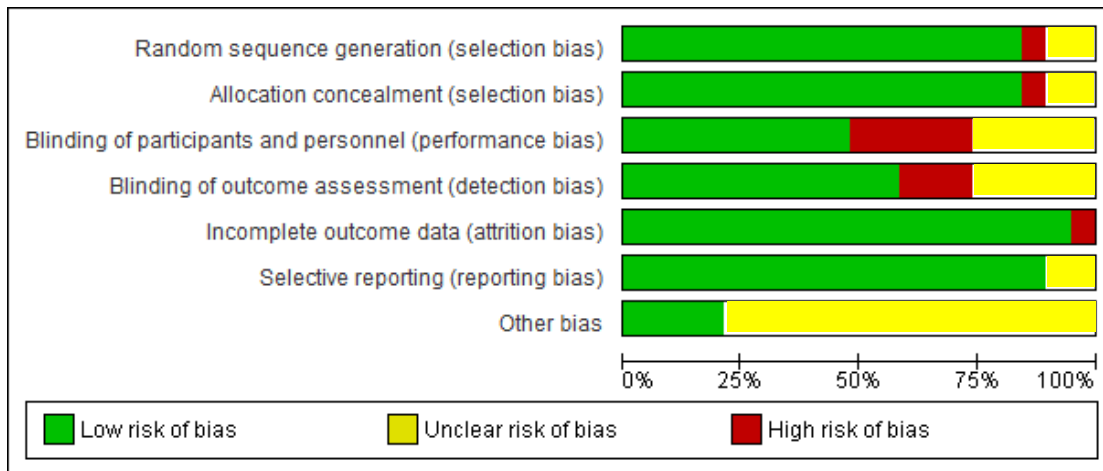

Table S3: Risk of bias and quality of nonrandomized studies,  
evaluated by the Newcastle-Ottawa Scale (NOS)

| Cohort studies       | Representativeness of the exposed cohort | Selection of the non-exposed cohort | Ascertainment of exposure | Demonstration that outcome of interest was not present at the start of the study | Study controls for severity of PE | Study controls for an additional factor | Assessment of outcome     | Was follow-up long enough for outcomes to occur (≥30 days) | Adequacy of follow up of cohorts (loss-to-follow-up <20%) | Total score |
|----------------------|------------------------------------------|-------------------------------------|---------------------------|----------------------------------------------------------------------------------|-----------------------------------|-----------------------------------------|---------------------------|------------------------------------------------------------|-----------------------------------------------------------|-------------|
| S.D'Auria 2020       | *                                        | *                                   | *                         | *                                                                                | *                                 | *                                       | *                         | *                                                          | *                                                         | 9           |
| A.J.Schissler 2018   | *                                        | *                                   | *                         | NA                                                                               | *                                 | *                                       | *                         | *                                                          | *                                                         | 8           |
| S.E. Beyer 2020      | *                                        | *                                   | *                         | *                                                                                | NA                                | NA                                      | *                         | *                                                          | *                                                         | 7           |
| J.W.Yoo 2016         | *                                        | *                                   | *                         | *                                                                                | *                                 | *                                       | *                         | NA                                                         | *                                                         | 8           |
| E.Hamel 2001         | *                                        | *                                   | *                         | *                                                                                | *                                 | *                                       | *                         | *                                                          | *                                                         | 9           |
| N.L.Liang 2017       | *                                        | *                                   | *                         | *                                                                                | *                                 | NA                                      | *                         | NA                                                         | *                                                         | 7           |
| S.Arora 2017         | *                                        | *                                   | *                         | *                                                                                | NA                                | *                                       | *                         | *                                                          | *                                                         | 8           |
| E.D.Avgerinos 2016   | *                                        | *                                   | *                         | *                                                                                | *                                 | NA                                      | *                         | *                                                          | *                                                         | 8           |
| A.K.Sista 2018       | *                                        | *                                   | *                         | *                                                                                | *                                 | *                                       | *                         | NA                                                         | *                                                         | 8           |
| P.D.Stein 2020       | *                                        | *                                   | *                         | NA                                                                               | *                                 | *                                       | *                         | *                                                          | *                                                         | 8           |
| J.K.Lee 2020         | *                                        | *                                   | *                         | *                                                                                | *                                 | *                                       | *                         | *                                                          | *                                                         | 9           |
| Klevanets, J 2017    | *                                        | *                                   | *                         | *                                                                                | *                                 | *                                       | *                         | *                                                          | *                                                         | 9           |
| M.Sharifi 2019       | *                                        | NA                                  | *                         | *                                                                                | *                                 | NA                                      | *                         | *                                                          | *                                                         | 7           |
| E.D.Avgerinos 2016   | *                                        | *                                   | *                         | *                                                                                | *                                 | NA                                      | *                         | NA                                                         | *                                                         | 7           |
| E. Harrison 2021     | NA                                       | *                                   | *                         | *                                                                                | *                                 | *                                       | *                         | NA                                                         | *                                                         | 7           |
| M. Bradley 2022      | *                                        | *                                   | *                         | *                                                                                | NA                                | *                                       | *                         | NA                                                         | *                                                         | 7           |
| S. Gorgis 2022       | *                                        | *                                   | *                         | *                                                                                | *                                 | NA                                      | *                         | *                                                          | *                                                         | 8           |
| T.M Kline 2021       | *                                        | *                                   | *                         | *                                                                                | *                                 | NA                                      | *                         | NA                                                         | *                                                         | 7           |
| N. Patel 2022        | *                                        | *                                   | *                         | *                                                                                | *                                 | *                                       | *                         | NA                                                         | *                                                         | 8           |
| D.S.H Lin 2021       | *                                        | *                                   | *                         | *                                                                                | *                                 | *                                       | *                         | *                                                          | *                                                         | 9           |
| E.S Yilmaz 2021      | *                                        | *                                   | *                         | *                                                                                | *                                 | *                                       | *                         | NA                                                         | *                                                         | 8           |
| C. Weng 2021         | *                                        | *                                   | *                         | *                                                                                | NA                                | *                                       | *                         | *                                                          | *                                                         | 8           |
| L. Zimmermann 2021   | *                                        | *                                   | *                         | *                                                                                | *                                 | *                                       | *                         | *                                                          | *                                                         | 9           |
| Geller 2020          | *                                        | *                                   | *                         | *                                                                                | *                                 | *                                       | *                         | *                                                          | *                                                         | 9           |
| Case-control studies | Adequate case definition                 | Representativeness of the cases     | Selection of Controls     | Definition of Controls                                                           | Study controls for severity of PE | Study controls for an additional factor | Ascertainment of exposure | The same method of ascertainment for cases and controls    | the same non-response rate for both groups                | Total score |
| N.U. Rehman 2020     | *                                        | *                                   | *                         | *                                                                                | *                                 | NA                                      | *                         | *                                                          | *                                                         | 8           |



## Figure S28: GRADE assessment:

For the rating of the quality of the indirect evidence, Puhan (2019, BMJ) says this: The lower confidence rating of the two direct comparisons constitutes the confidence rating of the indirect comparison“ .

In the GRADE table in this NMA for all-cause mortality, direct estimates for ST vs AC and CDT vs AC are rated as low quality evidence. Any comparison including these should also be rated as low. In particular, the indirect comparison for CDT vs AC involves direct effects for CDT vs ST (moderate) and ST vs AC (low), so should be graded as low. There is no upgrading of indirect evidence in the GRADE framework (only single estimates from observational studies). The consequence is that the CDT vs AC NMA estimate should also be low quality, as both the indirect and direct evidence are low quality.

### A) All-cause mortality

| Comparison       | Direct evidence   |                                 | Indirect evidence |                          | Network meta-analysis |                     |
|------------------|-------------------|---------------------------------|-------------------|--------------------------|-----------------------|---------------------|
|                  | Odd ratio (95%CI) | Quality of evidence             | Odd ratio (95%CI) | Quality of evidence      | Odd ratio (95%CI)     | Quality of evidence |
| <b>ST vs AC</b>  | 0.69 (0.44-1.07)  | MODERATE<br>⊕⊕⊕○                | 1.17(0.64-2.14)   | LOW <sup>1</sup><br>⊕⊕○○ | 0.83 (0.58-1.19)      | MODERATE<br>⊕⊕⊕○    |
| <b>CDT vs ST</b> | 0.40 (0.29-0.54)  | MODERATE <sup>2,3</sup><br>⊕⊕⊕○ | 0.66 (0.33-1.32)  | LOW <sup>1</sup><br>⊕⊕○○ | 0.43 (0.32-0.57)      | MODERATE<br>⊕⊕⊕○    |
| <b>CDT vs AC</b> | 0.46 (0.28-0.76)  | MODERATE<br>⊕⊕⊕○                | 0.27 (0.15-0.46)  | MODERATE<br>⊕⊕⊕○         | 0.36 (0.25-0.52)      | MODERATE<br>⊕⊕⊕○    |

For ICH, indirect evidence for ST vs AC has to be the lower of the quality ratings of the two involved direct comparisons (moderate and very low, so the result is “very low”). That results in the ST vs AC NMA rating being low (the rating of the direct estimate).

We grade the indirect comparison for ST vs AC as very low-quality evidence, the results in the ST vs AC NMA were also rate as low:

## B) ICH

| Comparison       | Direct evidence   |                                 | Indirect evidence |                                 | Network meta-analysis |                     |
|------------------|-------------------|---------------------------------|-------------------|---------------------------------|-----------------------|---------------------|
|                  | Odd ratio (95%CI) | Quality of evidence             | Odd ratio (95%CI) | Quality of evidence             | Odd ratio (95%CI)     | Quality of evidence |
| <b>ST vs AC</b>  | 3.20 (1.64-6.25)  | LOW <sup>2,3</sup><br>⊕⊕○○      | 1.54 (0.12-19.10) | VERY LOW <sup>1,2</sup><br>⊕○○○ | 3.05 (1.60-5.83)      | LOW<br>⊕⊕○○         |
| <b>CDT vs ST</b> | 0.44 (0.30-0.66)  | MODERATE <sup>2,3</sup><br>⊕⊕⊕○ | 0.21 (0.02-2.79)  | LOW <sup>1,2,3</sup><br>⊕⊕○○    | 0.44 (0.29-0.64)      | MODERATE<br>⊕⊕⊕○    |
| <b>CDT vs AC</b> | 0.68 (0.06-8.20)  | VERY LOW <sup>1,2</sup><br>⊕○○○ | 1.42 (0.65-3.08)  | LOW <sup>1</sup><br>⊕⊕○○        | 1.33 (0.63-2.79)      | LOW<br>⊕⊕○○         |

<sup>1</sup> Imprecision was downgraded by 1 level because the 95% of the relative risk (RR) was wide.

<sup>2</sup> <30% of the included studies are RCT evidence rated down by one level.

<sup>3</sup> Evidence rated up by one level because of very large magnitude of effect.

**The quality of indirect evidence for major bleeding should be low for all three comparisons (as all there involve a low rating), so only AC vs ST has a high quality NMA estimate. The other two are low.**

The quality of indirect evidence for major bleeding were changed to low for all three comparisons. The quality of NMA for CDT vs ST and CDT vs AC were also changed to low.

## C) Major bleeding:

| Comparison       | Direct evidence   |                           | Indirect evidence |                          | Network meta-analysis |                     |
|------------------|-------------------|---------------------------|-------------------|--------------------------|-----------------------|---------------------|
|                  | Odd ratio (95%CI) | Quality of evidence       | Odd ratio (95%CI) | Quality of evidence      | Odd ratio (95%CI)     | Quality of evidence |
| <b>ST vs AC</b>  | 2.08 (1.50-2.87)  | HIGH <sup>3</sup><br>⊕⊕⊕⊕ | 1.77 (0.49-6.37)  | LOW <sup>2</sup><br>⊕⊕○○ | 2.06 (1.50-2.82)      | HIGH<br>⊕⊕⊕⊕        |
| <b>CDT vs ST</b> | 0.61 (0.52-0.70)  | LOW <sup>2</sup><br>⊕⊕○○  | 0.61 (0.16-2.37)  | LOW <sup>2</sup><br>⊕⊕○○ | 0.61 (0.53-0.70)      | LOW<br>⊕⊕○○         |
| <b>CDT vs AC</b> | 1.09 (0.32-3.63)  | LOW <sup>1</sup><br>⊕⊕○○  | 1.26 (0.88-1.80)  | LOW <sup>1</sup><br>⊕⊕○○ | 1.24 (0.88-1.75)      | LOW<br>⊕⊕○○         |

<sup>1</sup> Imprecision was downgraded by 1 level because the 95% of the relative risk (RR) was wide.

<sup>2</sup> <30% of the included studies are RCT evidence rated down by one level.

<sup>3</sup> Evidence rated up by one level because of very large magnitude of effect.

**These points are important, not only because they refer to proper application of GRADE, but because they highlight the uncertainty from NMA, especially when there are observational studies of potentially low quality involved in the comparisons of interest involving CDT.**

**Table S4: Reasons for studies exclusion**

| Study                     | Reasons for exclusion                                                                                                                                                                                                                                                                                                                                                                                            |
|---------------------------|------------------------------------------------------------------------------------------------------------------------------------------------------------------------------------------------------------------------------------------------------------------------------------------------------------------------------------------------------------------------------------------------------------------|
| Hobohm 2021 (5)           | <ul style="list-style-type: none"> <li>• High risk of bias due to Significant differences between Baseline characteristics (Hypoxia above 10% difference, RV dysfunction above 5% difference, shock above 5% difference, need for cardiac pulmonary resuscitation above 20%)</li> <li>• No adjusting was made to relevant outcomes.</li> </ul>                                                                   |
| Iskandar 2022 (6)         | <ul style="list-style-type: none"> <li>• There is no information available regarding the characteristics of the different groups that may affect the results.</li> <li>• No adjusting was made to rural relevant outcomes (in form of events).</li> </ul>                                                                                                                                                        |
| Krishnan 2022 (7)         | <ul style="list-style-type: none"> <li>• High risk of bias due to Significant differences between Baseline characteristics (differences in age- above 4 years in patients over 60 years old).</li> <li>• No adjusting was made to rural relevant outcomes (in form of events).</li> <li>• No data on important covariance such as RV dysfunction, troponin, hemodynamic status, risk for bleeding.</li> </ul>    |
| Barrett 2010 (8)          | <ul style="list-style-type: none"> <li>• Eighteen patients received no definitive therapy from total of 51 patients.</li> <li>• High risk for selection bias due to Significant differences between Baseline characteristics (differences in age- above 7 years, differences in intracranial pathology- above 40%).</li> <li>• No adjusting was made to rural relevant outcomes (in form of events).</li> </ul>  |
| Konstantinides 1998 (9)   | <ul style="list-style-type: none"> <li>• Continuous variables outcomes - not suitable for NMA using Package 'netmeta' in R.</li> </ul>                                                                                                                                                                                                                                                                           |
| Nakamura 2005 (10)        | <ul style="list-style-type: none"> <li>• No data on important covariance such as RV dysfunction, troponin, hemodynamic status, risk for bleeding in the presentation.</li> <li>• Table 1 Significant differences between the groups such as differences in shock above 15% and RV afterload stress, and it is not clear whether this data is characteristics or outcomes.</li> </ul>                             |
| A. Riera-Mestre 2012 (11) | <ul style="list-style-type: none"> <li>• No standardization of the “no thrombolysis” group.</li> <li>• Mortality outcomes were presented in form of OR.</li> </ul>                                                                                                                                                                                                                                               |
| Sekulic 2020 (12)         | <ul style="list-style-type: none"> <li>• High risk of bias due to Significant differences between Baseline characteristics (differences in age- above 7 years, differences in PESI score, clinical differences in hypoxia and saturation (above 5%), differences in right ventricular systolic pressure (above 15%).</li> <li>• No adjusting was made to rural relevant outcomes (in form of events).</li> </ul> |
| Zulty 2021 (13)           | <ul style="list-style-type: none"> <li>• High risk of bias due to Significant differences between Baseline characteristics (differences in</li> </ul>                                                                                                                                                                                                                                                            |

|                    |                                                                                                                                                                                                                                                                                                                                                |
|--------------------|------------------------------------------------------------------------------------------------------------------------------------------------------------------------------------------------------------------------------------------------------------------------------------------------------------------------------------------------|
|                    | <p>Elevated troponin (above 25%), differences in RV strain on CT scan (above 25%).</p> <ul style="list-style-type: none"> <li>• No adjusting was made to rural relevant outcomes (in form of events).</li> <li>• The comparison to CDT was “standard treatment” (included both anticoagulation and possibly systemic thrombolysis).</li> </ul> |
| Omaygenc 2021 (14) | <ul style="list-style-type: none"> <li>• High risk of bias due to Significant differences between Baseline characteristics (differences in age-above 10 years, saturation (3%), Systolic pulmonary artery pressure (12%).</li> <li>• No adjusting was made to rural relevant outcomes (in form of events).</li> </ul>                          |

**Table S5: Bleeding definitions**

| First author and year | Bleeding definitions                                                                                                                                                                                                                                                                                                                                                      |
|-----------------------|---------------------------------------------------------------------------------------------------------------------------------------------------------------------------------------------------------------------------------------------------------------------------------------------------------------------------------------------------------------------------|
| Fasullo 2011          | Major: fatal, intracranial, required transfusions or intervention for hemodynamic deterioration.<br>Minor bleeding: episodes not fulfilling major bleeding criteria                                                                                                                                                                                                       |
| D'Auria 2020          | ICD 9 and ICD 10 codes, internal billing codes                                                                                                                                                                                                                                                                                                                            |
| Schissler 2018        | GUSTO criteria.(11)                                                                                                                                                                                                                                                                                                                                                       |
| Meyer 2014            | Major bleeding: ICH, life threatening, fatal, need for transfusion<br>Moderate bleeding: requiring blood transfusion(s), not life-threatening, not requiring emergency fluid replacement, inotropic support, or interventional treatment. Bleeding events were also reported using the criteria proposed by the International Society on Thrombosis and Haemostasis. (12) |
| Beyer 2020            | Diagnostic and Procedure Billing Codes. (ICD-10 CM/PCS Code)                                                                                                                                                                                                                                                                                                              |
| Dotter 1979           | Not prespecified                                                                                                                                                                                                                                                                                                                                                          |
| Avgerinos 2016        | Not prespecified                                                                                                                                                                                                                                                                                                                                                          |
| Klevanets 2017        | Not prespecified                                                                                                                                                                                                                                                                                                                                                          |
| Macovei 2015          | Major bleeding: brain bleeding or gastro- intestinal, massive hematoma on the puncture site or acute post-hemorrhagic anemia<br>Minor bleeding: hematoma on the puncture site, transient ischemic attack                                                                                                                                                                  |
| Sharifi 2019          | GUSTO criteria.(11)                                                                                                                                                                                                                                                                                                                                                       |
| Jerjes-Sanchez 1995   | Not prespecified                                                                                                                                                                                                                                                                                                                                                          |
| Blackmon 1970         | Major bleeding: Hematocrit drop >10 points, 2 or more units packed RBC.                                                                                                                                                                                                                                                                                                   |
| Stein 1990            | Not prespecified                                                                                                                                                                                                                                                                                                                                                          |
| Yoo 2016              | Major bleeding: fatal bleeding, hemorrhagic stroke, Hgb drop >2 g/dl, with or without the need for packed red cell transfusion.                                                                                                                                                                                                                                           |
| Hamel 2001            | Severe bleeding: intracranial hemorrhage, decrease in hemoglobin level (at least 4 g/100 ml), bleeding that required surgery or blood transfusion of 2 or more units.                                                                                                                                                                                                     |
| Liang 2017            | GUSTO criteria.(11)                                                                                                                                                                                                                                                                                                                                                       |
| Tibbutt 1974          | Not prespecified                                                                                                                                                                                                                                                                                                                                                          |
| Ahmed 2018            | Not prespecified                                                                                                                                                                                                                                                                                                                                                          |
| Ly 1978               | Not prespecified                                                                                                                                                                                                                                                                                                                                                          |
| Miller 1971           | Not prespecified                                                                                                                                                                                                                                                                                                                                                          |
| Kucher 2014           | Major bleeding: overt bleeding with Hgb drop >2 g/dl, transfusion of $\geq 2$ U of RBC, involvement of a critical site (intracranial, intraspinal, intraocular, retroperitoneal, intra-articular or pericardial, or intramuscular with compartment syndrome).<br>Minor bleeding: Clinically overt bleeding not fulfilling the criteria of major bleeding.                 |
| Arora 2017            | Identified using appropriate ICD-9 diagnosis and procedural code in secondary fields                                                                                                                                                                                                                                                                                      |
| Avgerinos 2018        | GUSTO criteria.(11)                                                                                                                                                                                                                                                                                                                                                       |
| Goldhaber 1993        | Major bleeding: required surgery (e.g., laparotomy for Retroperitoneal bleeding) or any intracranial bleeding.                                                                                                                                                                                                                                                            |
| Zhang 2018            | Not prespecified                                                                                                                                                                                                                                                                                                                                                          |

|                     |                                                                                                                                                                                                                                                                                                                                                                                                                                                                                                                                                              |
|---------------------|--------------------------------------------------------------------------------------------------------------------------------------------------------------------------------------------------------------------------------------------------------------------------------------------------------------------------------------------------------------------------------------------------------------------------------------------------------------------------------------------------------------------------------------------------------------|
| Sista 2018          | Major bleeding: requiring transfusion, major hemoptysis requiring intubation, intracranial hemorrhage, or operation                                                                                                                                                                                                                                                                                                                                                                                                                                          |
| Dalla-Volta 1992    | Major bleeding was defined as an ICH or bleeding requiring transfusion of one or more units of blood                                                                                                                                                                                                                                                                                                                                                                                                                                                         |
| Sharifi 2013        | Not prespecified                                                                                                                                                                                                                                                                                                                                                                                                                                                                                                                                             |
| Konstantinides 2002 | Major bleeding: fatal bleeding, hemorrhagic stroke, or a drop in the hemoglobin concentration by at least 4 g per deciliter, with or without the need for red-cell transfusion.                                                                                                                                                                                                                                                                                                                                                                              |
| Lee 2020            | ICD-9-CM codes                                                                                                                                                                                                                                                                                                                                                                                                                                                                                                                                               |
| Stein 2020          | Not prespecified                                                                                                                                                                                                                                                                                                                                                                                                                                                                                                                                             |
| Rehman 2020         | Not prespecified                                                                                                                                                                                                                                                                                                                                                                                                                                                                                                                                             |
| Bradley 2022        | GUSTO criteria.(11)                                                                                                                                                                                                                                                                                                                                                                                                                                                                                                                                          |
| Gorgis 2022         | GUSTO criteria.(11)                                                                                                                                                                                                                                                                                                                                                                                                                                                                                                                                          |
| Sadeghipour 2022    | Bleeding Academic Research Consortium (BARC). (13)                                                                                                                                                                                                                                                                                                                                                                                                                                                                                                           |
| Kline 2021          | TIMI bleeding (Thrombolysis in Myocardial Infarction) criteria for secondary analysis. (13)                                                                                                                                                                                                                                                                                                                                                                                                                                                                  |
| Kroupa 2022         | Bleeding Academic Research Consortium (BARC). (13)                                                                                                                                                                                                                                                                                                                                                                                                                                                                                                           |
| Lin 2021            | ICD-9 CM diagnostic codes.<br>Major bleeding 3361, 3636, 37272, 37632, 37742, 37923, 4230, 430, 431, 4320, 4321, 4329, 531, 5312, 5314, 5316, 532, 5322, 5324, 5326, 5307, 533, 5332, 5334, 5336, 534, 5342, 5344, 5346, 5693, 53501, 53511, 53521, 53531, 53541, 53551, 53561, 53571, 53783, 53784, 56202, 56203, 56212, 56213, 56985, 578, 59381, 7191, 72992, 7725, 8520, 8522, 8524, 8530, 86601, 86602, 86611, 86612<br>Gastrointestinal bleeding 530.21, 530.7, 530.82, 531.xx-535.xx, 537.83, 537.84, 578.xx<br>Intracranial hemorrhage 430.xx-432.xx |
| Patel 2015          | ICD-9-CM codes                                                                                                                                                                                                                                                                                                                                                                                                                                                                                                                                               |
| Weng 2021           | Major bleeding was defined as fatal bleeding, hemorrhagic stroke, or a drop in the hemoglobin concentration by at least 4 g/dL                                                                                                                                                                                                                                                                                                                                                                                                                               |
| Yilmaz 2021         | according to the International Society on Thrombosis and Haemostasis definition. (14)                                                                                                                                                                                                                                                                                                                                                                                                                                                                        |
| Zimmermann 2022     | Bleeding complications were defined according to The International Society on Thrombosis and Haemostasis criteria. (14)                                                                                                                                                                                                                                                                                                                                                                                                                                      |
| Geller 2020         | ICD-9-CM codes                                                                                                                                                                                                                                                                                                                                                                                                                                                                                                                                               |

**Table S6: Mortality Outcomes in each study**

| <b>Study</b>        | <b>Mortality Outcome</b> | <b>Comments</b>                                                                                                                                                |
|---------------------|--------------------------|----------------------------------------------------------------------------------------------------------------------------------------------------------------|
| Arora 2017          | In-hospital mortality    |                                                                                                                                                                |
| Avgerinos 2016      | In-hospital mortality    |                                                                                                                                                                |
| Avgerinos 2018      | In-hospital mortality    |                                                                                                                                                                |
| Beyer 2020          | In-hospital mortality    |                                                                                                                                                                |
| Blackmon 1970       | 14 days                  |                                                                                                                                                                |
| Bradley 2022        | In-hospital mortality    |                                                                                                                                                                |
| D'Auria 2020        | 30 days                  |                                                                                                                                                                |
| Dalla-Volta 1992    | 30 days                  | Alteplase group: day 6, day 19. Heparin group: day 2                                                                                                           |
| Dotter 1979         | In-hospital mortality    | One patient treated with streptokinase died 4 days after the completion of therapy. Two heparin-treated patients died before the 72-hour therapy was completed |
| Fasullo 2011        | In-hospital mortality    |                                                                                                                                                                |
| Geller 2020         | In-hospital mortality    |                                                                                                                                                                |
| Goldhaber 1993      | In-hospital mortality    |                                                                                                                                                                |
| Gorgis 2022         | In-hospital mortality    |                                                                                                                                                                |
| Hamel 2001          | In-hospital mortality    |                                                                                                                                                                |
| Harrison 2021       | In-hospital mortality    |                                                                                                                                                                |
| Jerjes-Sanchez 1995 | In-hospital mortality    |                                                                                                                                                                |
| Kline 2021          | In-hospital mortality    |                                                                                                                                                                |
| Konstantinides 2002 | In-hospital mortality    |                                                                                                                                                                |
| Kroupa 2022         | 30 days                  |                                                                                                                                                                |
| Kucher 2014         | 30 days                  | 1 death in the heparin group 20 days after randomization                                                                                                       |
| Lee 2020            | In-hospital mortality    |                                                                                                                                                                |
| Lin 2021            | In-hospital mortality    |                                                                                                                                                                |

|                  |                       |                                                                                                                                                                                                                                                          |
|------------------|-----------------------|----------------------------------------------------------------------------------------------------------------------------------------------------------------------------------------------------------------------------------------------------------|
| Ly 1978          | 30 days               | Heparin group: 15 hours, day 30. Streptokinase group: day 22                                                                                                                                                                                             |
| Macovei 2015     | In-hospital mortality |                                                                                                                                                                                                                                                          |
| Meyer 2014       | In-hospital mortality |                                                                                                                                                                                                                                                          |
| Patel 2015       | In-hospital mortality |                                                                                                                                                                                                                                                          |
| Rehman 2020      | In-hospital mortality |                                                                                                                                                                                                                                                          |
| Sadeghipour 2022 | 90 days               |                                                                                                                                                                                                                                                          |
| Sharifi 2013     | Unclear               | Considering that there is no information regarding the four individuals who died, it is likely that they died not long after their hospitalization since PE is an acute cardiovascular disorder associated with a high mortality rate at an early stage. |
| Sharifi 2019     | 30 days               |                                                                                                                                                                                                                                                          |
| Sista 2018       | In-hospital mortality |                                                                                                                                                                                                                                                          |
| Stein 1990       | In-hospital mortality | Died of an arrhythmia 19 days after treatment with rt-PA.                                                                                                                                                                                                |
| Stein 2020       | In-hospital mortality | We combined data from non-saddle PE group and saddle PE group                                                                                                                                                                                            |
| Tibbutt 1974     | In-hospital mortality |                                                                                                                                                                                                                                                          |
| Weng 2021        | In-hospital mortality |                                                                                                                                                                                                                                                          |
| Yilmaz 2021      | In-hospital mortality |                                                                                                                                                                                                                                                          |
| Yoo 2016         | In-hospital mortality |                                                                                                                                                                                                                                                          |
| Zhang 2018       | In-hospital mortality | No deaths in the 3-month follow up                                                                                                                                                                                                                       |
| Zimmermann 2022  | In-hospital mortality |                                                                                                                                                                                                                                                          |



## Reference:

1. Hobohm L, Schmidt FP, Gori T, Schmidtman I, Barco S, Münzel T, et al. In-hospital outcomes of catheter-directed thrombolysis in patients with pulmonary embolism. *Eur Hear Journal Acute Cardiovasc Care*. 2021;10(3):258–64.
2. Iskandar JP, Hariri E, Kanaan C, Kassis N, Kamran H, Sese D, et al. The safety and efficacy of systemic versus catheter-based therapies: application of a prognostic model by a pulmonary embolism response team. *J Thromb Thrombolysis*. 2022;53(3):616–25.
3. Krishnan AM, Gadela NV, Ramanathan R, Jha A, Perkins ME, Metersky ML. A Comparative Analysis of Catheter Directed Thrombolysis with Anticoagulation Alone or Systemic tPA in Acute Pulmonary Embolism with Cor Pulmonale. *J Intensive Care Med*. 2022;37(10):1336–43.
4. Nicholas A Barrett, Anthony Byrne ADMH and NR. Management of massive pulmonary embolism: a retrospective single-centre cohort study. *Crit Care Study Guid Text Rev Second Ed*. 2010;(December):305–19.
5. Konstantinides S, Tiede N, Geibel A, Olschewski M, Just H, Kasper W. Comparison of alteplase versus heparin for resolution of major pulmonary embolism. *Am J Cardiol*. 1998;82(8):966–70.
6. Nakamura M, Nakanishi N, Yamada N, Sakuma M, Miyahara Y, Okada O, et al. Effectiveness and safety of the thrombolytic therapy for acute pulmonary thromboembolism: Results of a multicenter registry in the Japanese Society of Pulmonary Embolism Research. *Int J Cardiol*. 2005;99(1):83–9.
7. Riera-Mestre A, Jiménez D, Muriel A, Lobo JL, Moores L, Yusen RD, et al. Thrombolytic therapy and outcome of patients with an acute symptomatic pulmonary embolism. *J Thromb Haemost*. 2012;10(5):751–9.
8. Sekulic I, Dzudovic B, Matijasevic J, Batranovic U, Rusovic S, Mihajlovic M, et al. Ultrasound assisted thrombolysis in intermediate-risk patients with pulmonary thromboembolism. *Acta Cardiol*. 2020;75(7):623–30.
9. Zulty M, Saleh N, Hernandez J, Kalaria A, Camire L, Weisman DS. Catheter-Directed Therapy: Outcomes Versus Standard of Care and Evaluation of Current Practice. *Am J Med*. 2021;134(3):400–4.
10. Omaygenc DO, Omaygenc MO. thrombolysis and anticoagulation embolism : A retrospective analysis. 2021;
11. Investigators TG. An International Randomized Trial Comparing Four Thrombolytic Strategies for Acute Myocardial Infarction. *N Engl J Med*. 1993 Jan 15;329(10):673–82.
12. Schulman S, Kearon C. Definition of major bleeding in clinical investigations of antihemostatic medicinal products in non-surgical patients. Vol. 3, *Journal of Thrombosis and Haemostasis*. J Thromb Haemost; 2005. p. 692–4.
13. Mehran R, Rao S V., Bhatt DL, Gibson CM, Caixeta A, Eikelboom J, et al. Standardized bleeding definitions for cardiovascular clinical trials: A consensus report from the bleeding academic research consortium. *Circulation*. 2011;123(23):2736–47.
14. Schulman S, Anger SU, Bergqvist D, Eriksson B, Lassen MR, Fisher W. Definition of major bleeding in clinical investigations of antihemostatic medicinal products in surgical patients. *J Thromb Haemost*. 2010;8(1):202–4.
